# Supplementary material
Source: Royal Society of Chemistry journal article supplement (doi:10.1039/d6ob00575f)
Supplement: d6ob00575f1.pdf [file d6ob00575f1.pdf]

## Supporting Information

### Anti-adipogenic Cyathane Diterpenoids from *Onychium japonicum*

Zhen-Yu Yang,<sup>a,b</sup> Wen-Na Fan,<sup>b</sup> Xiu-Qing Song,<sup>\*,b,c</sup> Yao-Yue Fan<sup>\*,a,b,c</sup>

<sup>a</sup>*School of Pharmacy, Anhui University of Chinese Medicine, Hefei 230012, People's Republic of China*

<sup>b</sup>*Shandong Laboratory of Yantai Drug Discovery, Bohai Rim Advanced Research Institute for Drug Discovery, Yantai 264117, People's Republic of China*

<sup>c</sup>*State Key Laboratory of Chemical Biology, Shanghai Institute of Materia Medica, Chinese Academy of Sciences, Shanghai 201203, People's Republic of China*

## Table of Contents

|                                                                                                                   |    |
|-------------------------------------------------------------------------------------------------------------------|----|
| <b>Figure S1.</b> Key $^1\text{H}$ - $^1\text{H}$ COSY and HMBC correlations for compounds <b>2–10</b> .....      | 6  |
| <b>Figure S2.</b> Key NOESY correlations for compounds <b>2–10</b> .....                                          | 6  |
| <b>Figure S3.</b> Experimental ECD spectra of compounds <b>2, 3, 5</b> and <b>7–10</b> . ....                     | 7  |
| <b>Figure S4.</b> Anti-adipogenic effect of crude extract of <i>Onychium japonicum</i> on 3T3-L1 adipocytes. .... | 7  |
| <b>Figure S5.</b> Anti-adipogenic effect of compounds <b>1–15</b> on 3T3-L1 adipocytes.....                       | 7  |
| <b>Figure S6.</b> The $^1\text{H}$ NMR spectrum of <b>1</b> in $\text{CD}_3\text{OD}$ .....                       | 9  |
| <b>Figure S7.</b> The $^{13}\text{C}$ NMR and DEPT spectrum of <b>1</b> in $\text{CD}_3\text{OD}$ .....           | 9  |
| <b>Figure S8.</b> The $^1\text{H}$ - $^1\text{H}$ COSY spectrum of <b>1</b> in $\text{CD}_3\text{OD}$ .....       | 10 |
| <b>Figure S9.</b> The HSQC spectrum of <b>1</b> in $\text{CD}_3\text{OD}$ . ....                                  | 10 |
| <b>Figure S10.</b> The HMBC spectrum of <b>1</b> in $\text{CD}_3\text{OD}$ . ....                                 | 11 |
| <b>Figure S11.</b> The NOESY spectrum of <b>1</b> in $\text{CD}_3\text{OD}$ .....                                 | 11 |
| <b>Figure S12.</b> The (+)-HRESIMS spectrum of <b>1</b> . ....                                                    | 12 |
| <b>Figure S13.</b> The IR spectrum of <b>1</b> .....                                                              | 12 |
| <b>Figure S14.</b> The $^1\text{H}$ NMR spectrum of <b>2</b> in $\text{CD}_3\text{OD}$ .....                      | 13 |
| <b>Figure S15.</b> The $^{13}\text{C}$ NMR and DEPT spectrum of <b>2</b> in $\text{CD}_3\text{OD}$ .....          | 13 |
| <b>Figure S16.</b> The $^1\text{H}$ - $^1\text{H}$ COSY spectrum of <b>2</b> in $\text{CD}_3\text{OD}$ .....      | 14 |
| <b>Figure S17.</b> The HSQC spectrum of <b>2</b> in $\text{CD}_3\text{OD}$ . ....                                 | 14 |
| <b>Figure S18.</b> The HMBC spectrum of <b>2</b> in $\text{CD}_3\text{OD}$ . ....                                 | 15 |
| <b>Figure S19.</b> The NOESY spectrum of <b>2</b> in $\text{CD}_3\text{OD}$ .....                                 | 15 |
| <b>Figure S20.</b> The (+)-HRESIMS spectrum of <b>2</b> . ....                                                    | 16 |
| <b>Figure S21.</b> The IR spectrum of <b>2</b> .....                                                              | 16 |
| <b>Figure S22.</b> The $^1\text{H}$ NMR spectrum of <b>3</b> in $\text{CD}_3\text{OD}$ .....                      | 17 |
| <b>Figure S23.</b> The $^{13}\text{C}$ NMR and DEPT spectrum of <b>3</b> in $\text{CD}_3\text{OD}$ .....          | 17 |
| <b>Figure S24.</b> The $^1\text{H}$ - $^1\text{H}$ COSY spectrum of <b>3</b> in $\text{CD}_3\text{OD}$ .....      | 18 |
| <b>Figure S25.</b> The HSQC spectrum of <b>3</b> in $\text{CD}_3\text{OD}$ . ....                                 | 18 |
| <b>Figure S26.</b> The HMBC spectrum of <b>3</b> in $\text{CD}_3\text{OD}$ . ....                                 | 19 |
| <b>Figure S27.</b> The NOESY spectrum of <b>3</b> in $\text{CD}_3\text{OD}$ .....                                 | 19 |
| <b>Figure S28.</b> The (+)-HRESIMS spectrum of <b>3</b> . ....                                                    | 20 |
| <b>Figure S29.</b> The IR spectrum of <b>3</b> .....                                                              | 20 |
| <b>Figure S30.</b> The $^1\text{H}$ NMR spectrum of <b>4</b> in $\text{CD}_3\text{OD}$ .....                      | 21 |

|                                                                                                              |    |
|--------------------------------------------------------------------------------------------------------------|----|
| <b>Figure S31.</b> The $^{13}\text{C}$ NMR and DEPT spectrum of <b>4</b> in $\text{CD}_3\text{OD}$ .....     | 21 |
| <b>Figure S32.</b> The $^1\text{H}$ - $^1\text{H}$ COSY spectrum of <b>4</b> in $\text{CD}_3\text{OD}$ ..... | 22 |
| <b>Figure S33.</b> The HSQC spectrum of <b>4</b> in $\text{CD}_3\text{OD}$ . ....                            | 22 |
| <b>Figure S34.</b> The HMBC spectrum of <b>4</b> in $\text{CD}_3\text{OD}$ . ....                            | 23 |
| <b>Figure S35.</b> The NOESY spectrum of <b>4</b> in $\text{CD}_3\text{OD}$ .....                            | 23 |
| <b>Figure S36.</b> The (+)-HRESIMS spectrum of <b>4</b> . ....                                               | 24 |
| <b>Figure S37.</b> The IR spectrum of <b>4</b> .....                                                         | 24 |
| <b>Figure S38.</b> The $^1\text{H}$ NMR spectrum of <b>5</b> in $\text{CD}_3\text{OD}$ .....                 | 25 |
| <b>Figure S39.</b> The $^{13}\text{C}$ NMR and DEPT spectrum of <b>5</b> in $\text{CD}_3\text{OD}$ .....     | 25 |
| <b>Figure S40.</b> The $^1\text{H}$ - $^1\text{H}$ COSY spectrum of <b>5</b> in $\text{CD}_3\text{OD}$ ..... | 26 |
| <b>Figure S41.</b> The HSQC spectrum of <b>5</b> in $\text{CD}_3\text{OD}$ . ....                            | 26 |
| <b>Figure S42.</b> The HMBC spectrum of <b>5</b> in $\text{CD}_3\text{OD}$ . ....                            | 27 |
| <b>Figure S43.</b> The NOESY spectrum of <b>5</b> in $\text{CD}_3\text{OD}$ .....                            | 27 |
| <b>Figure S44.</b> The (+)-HRESIMS spectrum of <b>5</b> . ....                                               | 28 |
| <b>Figure S45</b> The IR spectrum of <b>5</b> .....                                                          | 28 |
| <b>Figure S46.</b> The $^1\text{H}$ NMR spectrum of <b>6</b> in $\text{CD}_3\text{OD}$ .....                 | 29 |
| <b>Figure S47.</b> The $^{13}\text{C}$ NMR and DEPT spectrum of <b>6</b> in $\text{CD}_3\text{OD}$ .....     | 29 |
| <b>Figure S48.</b> The $^1\text{H}$ - $^1\text{H}$ COSY spectrum of <b>6</b> in $\text{CD}_3\text{OD}$ ..... | 30 |
| <b>Figure S49.</b> The HSQC spectrum of <b>6</b> in $\text{CD}_3\text{OD}$ . ....                            | 30 |
| <b>Figure S50.</b> The HMBC spectrum of <b>6</b> in $\text{CD}_3\text{OD}$ . ....                            | 31 |
| <b>Figure S51.</b> The NOESY spectrum of <b>6</b> in $\text{CD}_3\text{OD}$ .....                            | 31 |
| <b>Figure S52.</b> The (+)-HRESIMS spectrum of <b>6</b> . ....                                               | 32 |
| <b>Figure S53.</b> The IR spectrum of <b>6</b> .....                                                         | 32 |
| <b>Figure S54.</b> The $^1\text{H}$ NMR spectrum of <b>7</b> in $\text{CD}_3\text{OD}$ .....                 | 33 |
| <b>Figure S55.</b> The $^{13}\text{C}$ NMR and DEPT spectrum of <b>7</b> in $\text{CD}_3\text{OD}$ .....     | 33 |
| <b>Figure S56.</b> The $^1\text{H}$ - $^1\text{H}$ COSY spectrum of <b>7</b> in $\text{CD}_3\text{OD}$ ..... | 34 |
| <b>Figure S57.</b> The HSQC spectrum of <b>7</b> in $\text{CD}_3\text{OD}$ . ....                            | 34 |
| <b>Figure S58.</b> The HMBC spectrum of <b>7</b> in $\text{CD}_3\text{OD}$ . ....                            | 35 |
| <b>Figure S59.</b> The NOESY spectrum of <b>7</b> in $\text{CD}_3\text{OD}$ .....                            | 35 |
| <b>Figure S60.</b> The (+)-HRESIMS spectrum of <b>7</b> . ....                                               | 36 |
| <b>Figure S61.</b> The IR spectrum of <b>7</b> .....                                                         | 36 |
| <b>Figure S62.</b> The $^1\text{H}$ NMR spectrum of <b>8</b> in $\text{CD}_3\text{OD}$ .....                 | 37 |
| <b>Figure S63.</b> The $^{13}\text{C}$ NMR and DEPT spectrum of <b>8</b> in $\text{CD}_3\text{OD}$ .....     | 37 |

|                                                                                                               |    |
|---------------------------------------------------------------------------------------------------------------|----|
| <b>Figure S64.</b> The $^1\text{H}$ - $^1\text{H}$ COSY spectrum of <b>8</b> in $\text{CD}_3\text{OD}$ .....  | 38 |
| <b>Figure S65.</b> The HSQC spectrum of <b>8</b> in $\text{CD}_3\text{OD}$ . ....                             | 38 |
| <b>Figure S66.</b> The HMBC spectrum of <b>8</b> in $\text{CD}_3\text{OD}$ . ....                             | 39 |
| <b>Figure S67.</b> The NOESY spectrum of <b>8</b> in $\text{CD}_3\text{OD}$ .....                             | 39 |
| <b>Figure S68.</b> The (+)-HRESIMS spectrum of <b>8</b> . ....                                                | 40 |
| <b>Figure S69.</b> The IR spectrum of <b>8</b> . ....                                                         | 40 |
| <b>Figure S70.</b> The $^1\text{H}$ NMR spectrum of <b>9</b> in $\text{CD}_3\text{OD}$ .....                  | 41 |
| <b>Figure S71.</b> The $^{13}\text{C}$ NMR and DEPT spectrum of <b>9</b> in $\text{CD}_3\text{OD}$ .....      | 41 |
| <b>Figure S72.</b> The $^1\text{H}$ - $^1\text{H}$ COSY spectrum of <b>9</b> in $\text{CD}_3\text{OD}$ .....  | 42 |
| <b>Figure S73.</b> The HSQC spectrum of <b>9</b> in $\text{CD}_3\text{OD}$ . ....                             | 42 |
| <b>Figure S74.</b> The HMBC spectrum of <b>9</b> in $\text{CD}_3\text{OD}$ . ....                             | 43 |
| <b>Figure S75.</b> The NOESY spectrum of <b>9</b> in $\text{CD}_3\text{OD}$ .....                             | 43 |
| <b>Figure S76.</b> The (+)-HRESIMS spectrum of <b>9</b> . ....                                                | 43 |
| <b>Figure S77.</b> The IR spectrum of <b>9</b> . ....                                                         | 43 |
| <b>Figure S78.</b> The $^1\text{H}$ NMR spectrum of <b>10</b> in $\text{CD}_3\text{OD}$ .....                 | 44 |
| <b>Figure S79.</b> The $^{13}\text{C}$ NMR and DEPT spectrum of <b>10</b> in $\text{CD}_3\text{OD}$ .....     | 44 |
| <b>Figure S80.</b> The $^1\text{H}$ - $^1\text{H}$ COSY spectrum of <b>10</b> in $\text{CD}_3\text{OD}$ ..... | 45 |
| <b>Figure S81.</b> The HSQC spectrum of <b>10</b> in $\text{CD}_3\text{OD}$ . ....                            | 45 |
| <b>Figure S82.</b> The HMBC spectrum of <b>10</b> in $\text{CD}_3\text{OD}$ . ....                            | 46 |
| <b>Figure S83.</b> The NOESY spectrum of <b>10</b> in $\text{CD}_3\text{OD}$ .....                            | 46 |
| <b>Figure S84.</b> The (+)-HRESIMS spectrum of <b>10</b> . ....                                               | 47 |
| <b>Figure S85.</b> The IR spectrum of <b>10</b> . ....                                                        | 47 |
| <b>Figure S86.</b> DP4+ detailed results of <b>7</b> . ....                                                   | 48 |
| <b>Figure S87.</b> HPLC spectra and purities of compounds <b>1–15</b> .....                                   | 50 |
| <b>Table S1.</b> Re-optimized conformers, energies and proportions for <b>1</b> .....                         | 55 |
| <b>Table S2.</b> Re-optimized conformers, energies and proportions for <b>2</b> .....                         | 56 |
| <b>Table S3.</b> Re-optimized conformers, energies and proportions for <b>4</b> .....                         | 57 |
| <b>Table S4.</b> Re-optimized conformers, energies and proportions for <b>6</b> .....                         | 58 |
| <b>Table S5.</b> mPW1PW91/6-31+G** reoptimized of <b>12R*-7</b> .....                                         | 59 |
| <b>Table S6.</b> mPW1PW91/6-31+G** reoptimized of <b>12S*-7</b> . ....                                        | 59 |

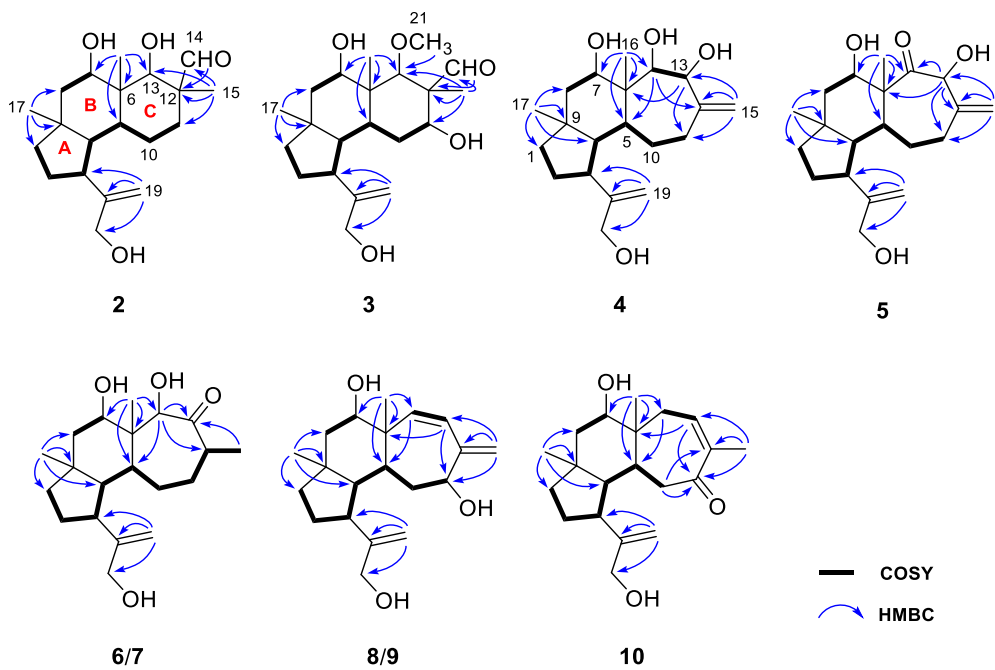

**Figure S1.** Key  $^1\text{H}$ - $^1\text{H}$  COSY and HMBC correlations for compounds 2–10.

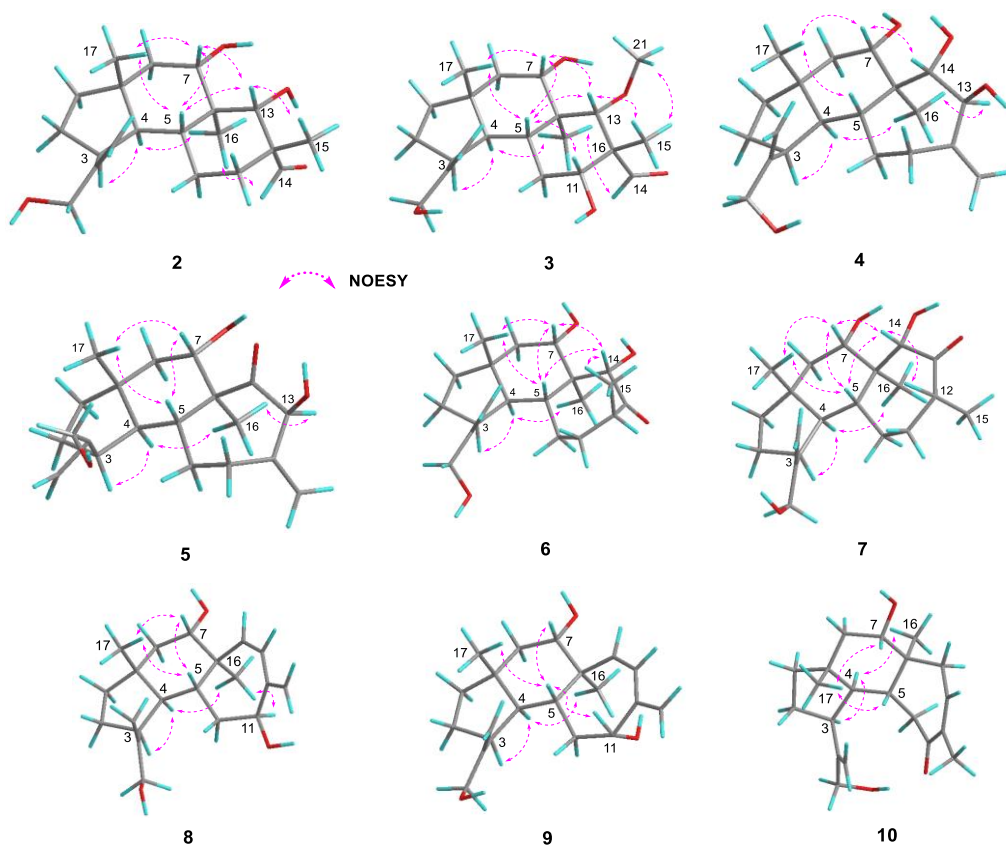

**Figure S2.** Key NOESY correlations for compounds 2–10.

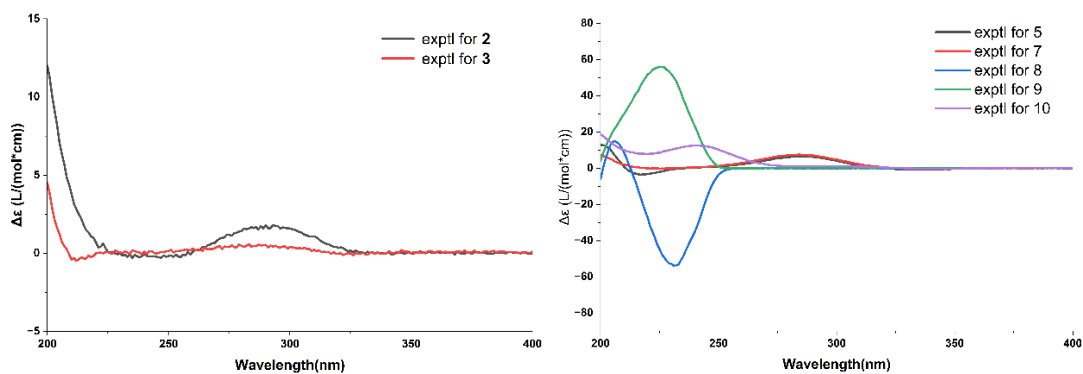

**Figure S3.** Experimental ECD spectra of compounds **2**, **3**, **5** and **7–10**.

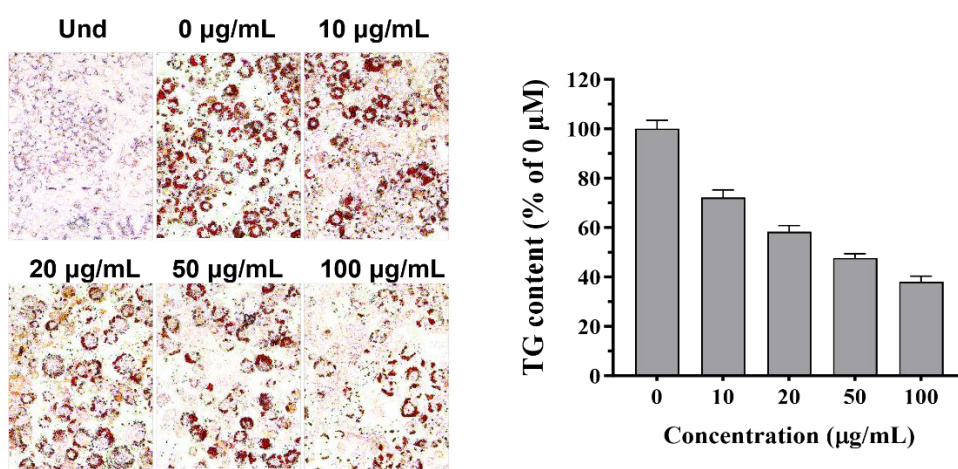

**Figure S4.** Anti-adipogenic effect of crude extract of *Onychium japonicum* on 3T3-L1 adipocytes.

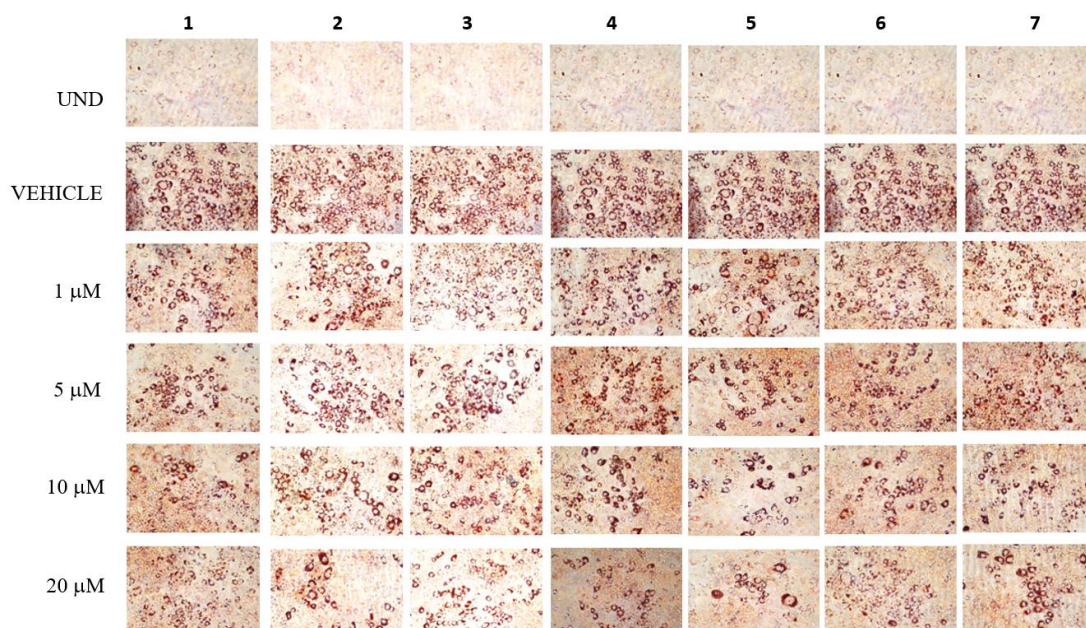

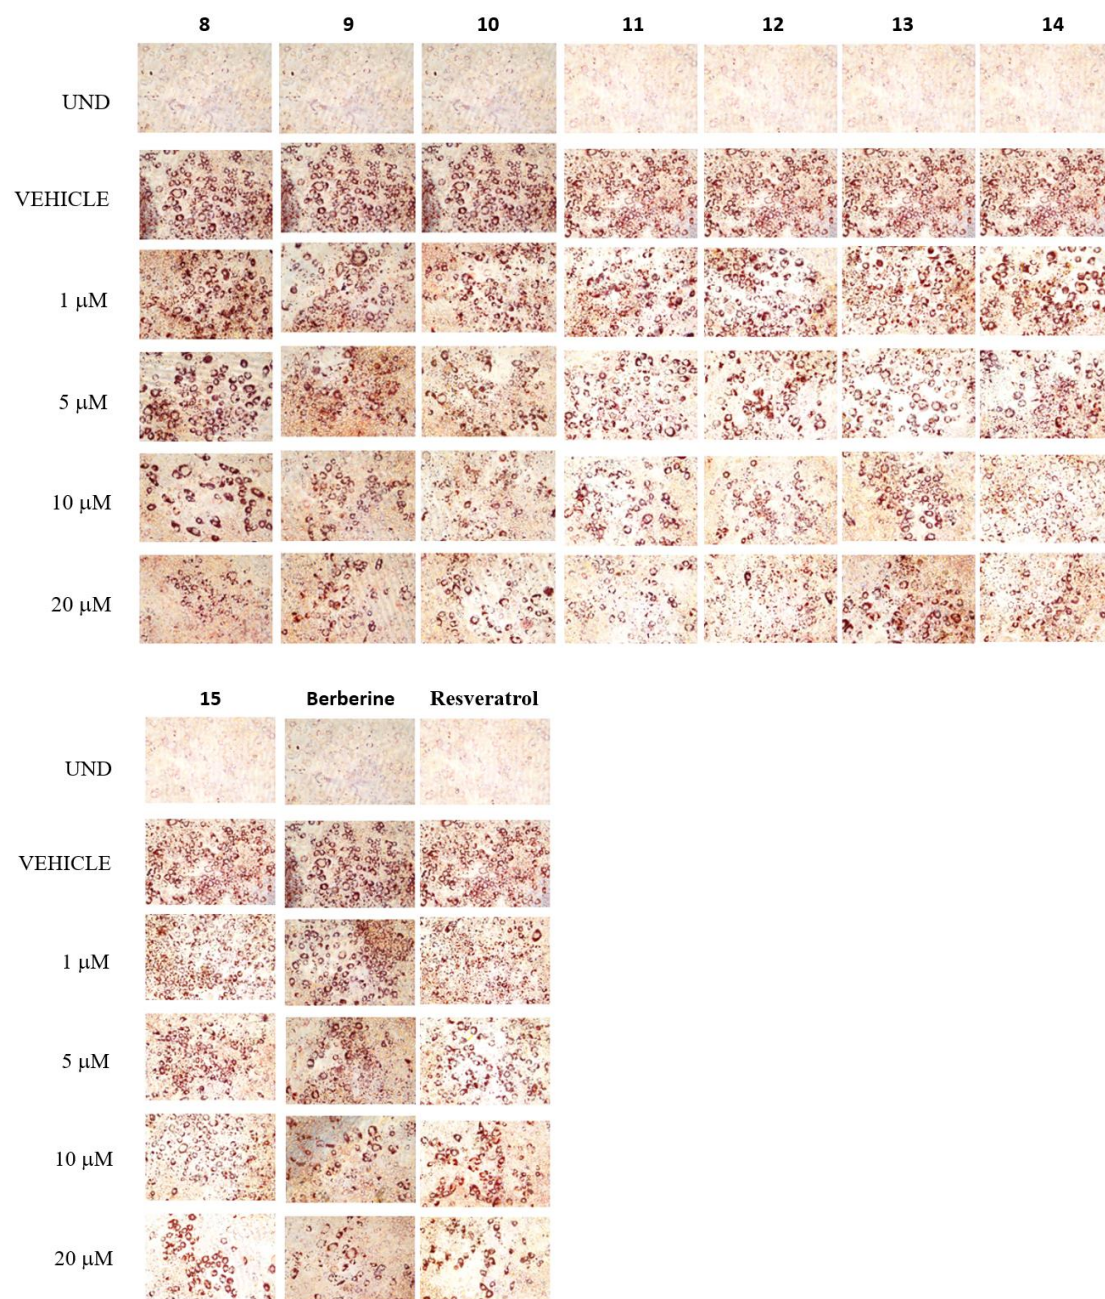

**Figure S5.** Anti-adipogenic effect of compounds **1–15** on 3T3-L1 adipocytes.



**Figure S8.** The  $^1\text{H}$ - $^1\text{H}$  COSY spectrum of **1** in  $\text{CD}_3\text{OD}$ .

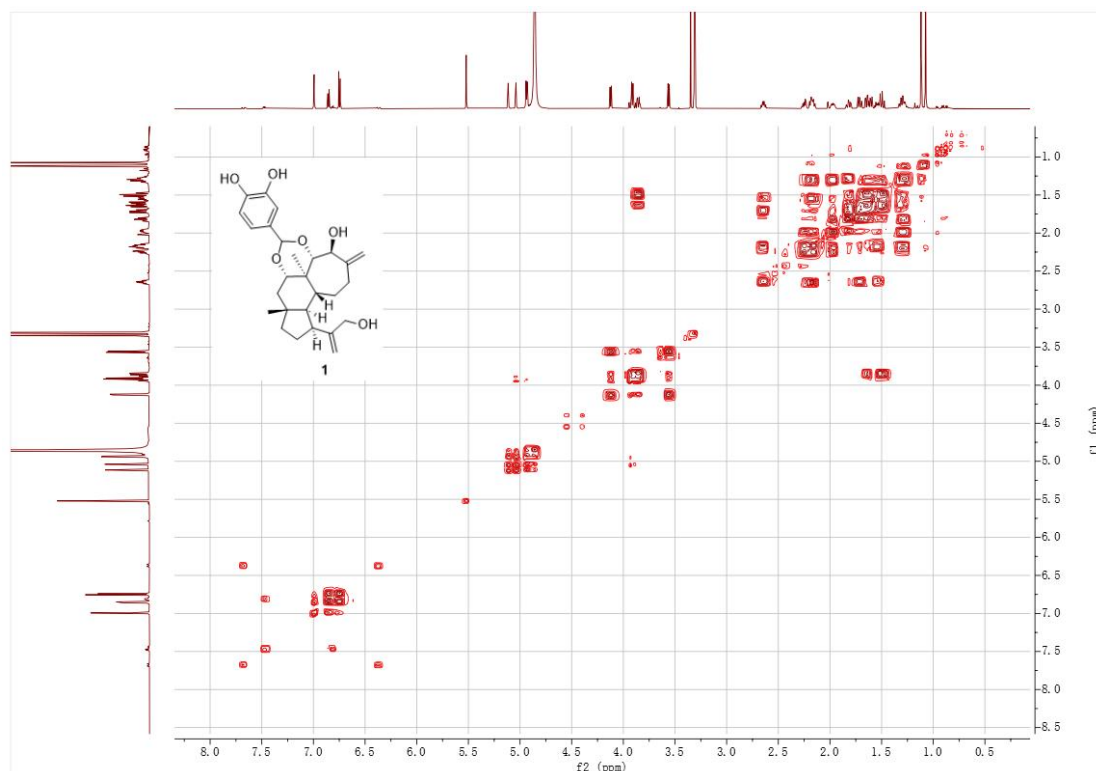

**Figure S9.** The HSQC spectrum of **1** in  $\text{CD}_3\text{OD}$ .

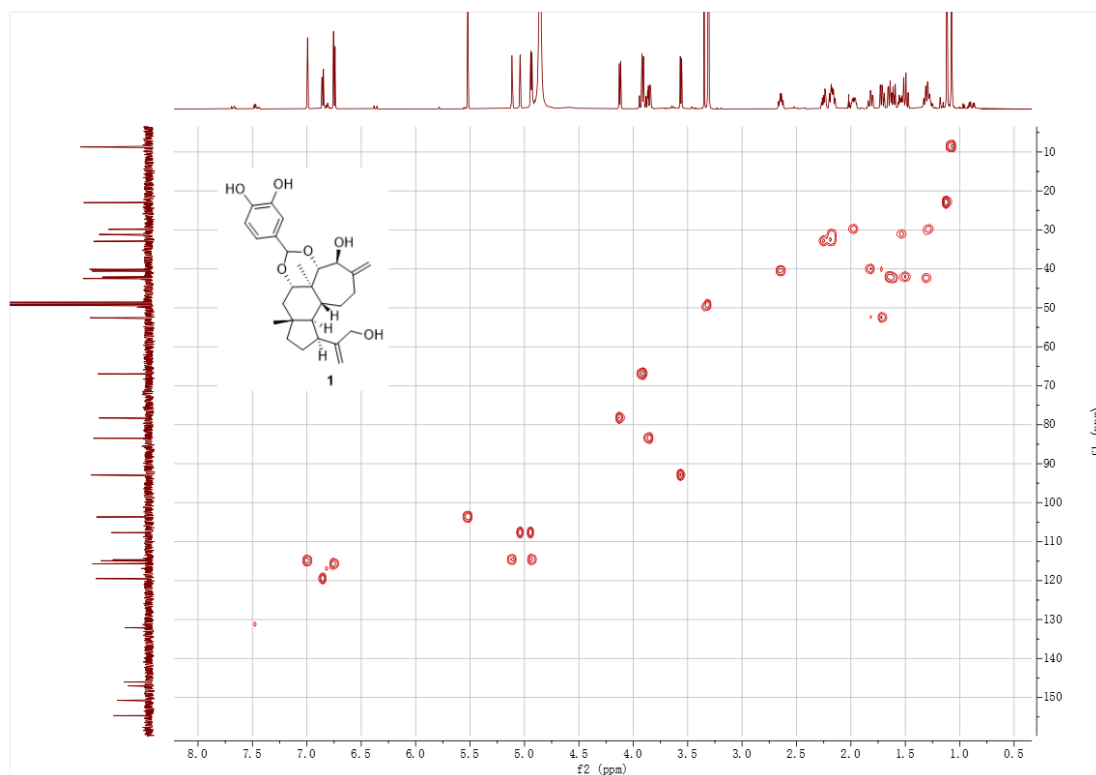

**Figure S10.** The HMBC spectrum of **1** in CD<sub>3</sub>OD.

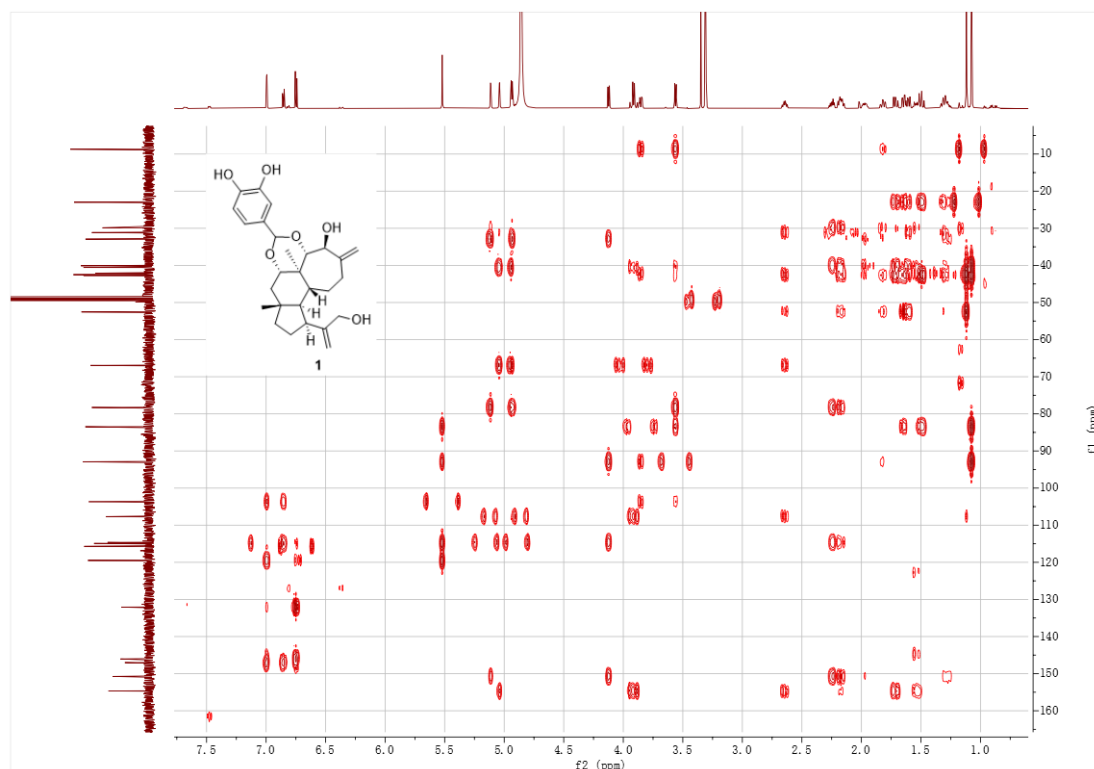

**Figure S11.** The NOESY spectrum of **1** in CD<sub>3</sub>OD.

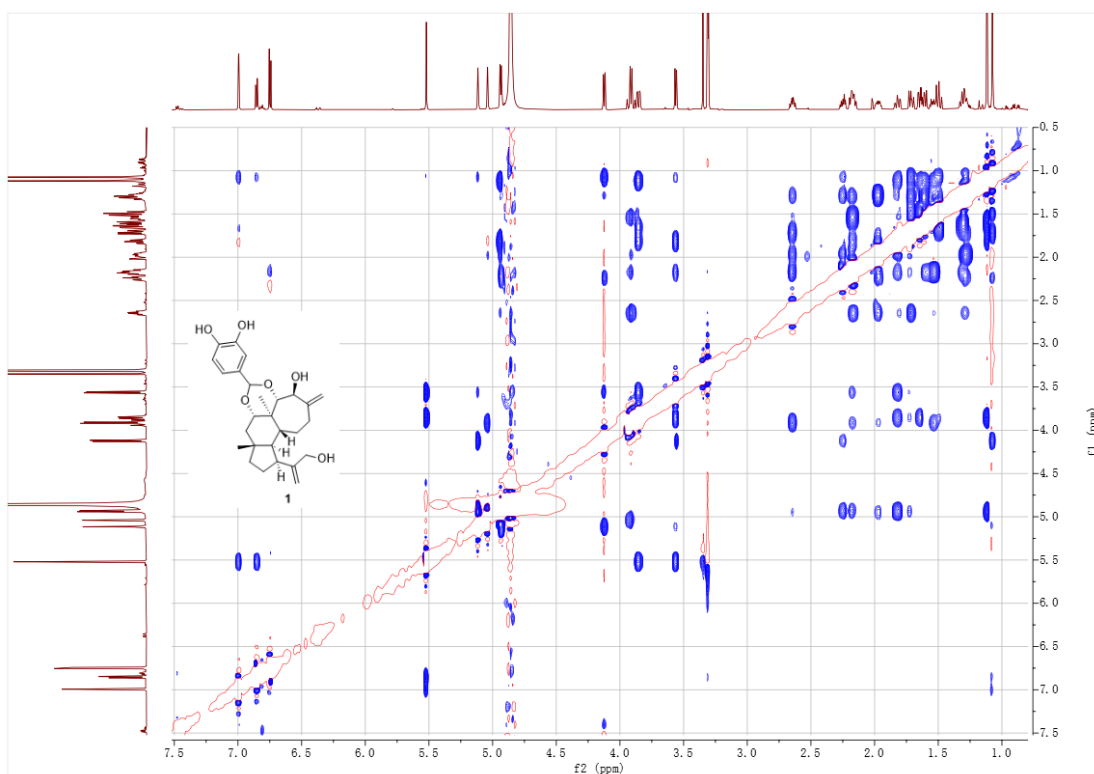

**Figure S12.** The (+)-HRESIMS spectrum of **1**.

Spectrum from XYZW-40.wiff2 (sample 1) - XYZW-40, +TOF MS (100 - 1000) from 1.382 min

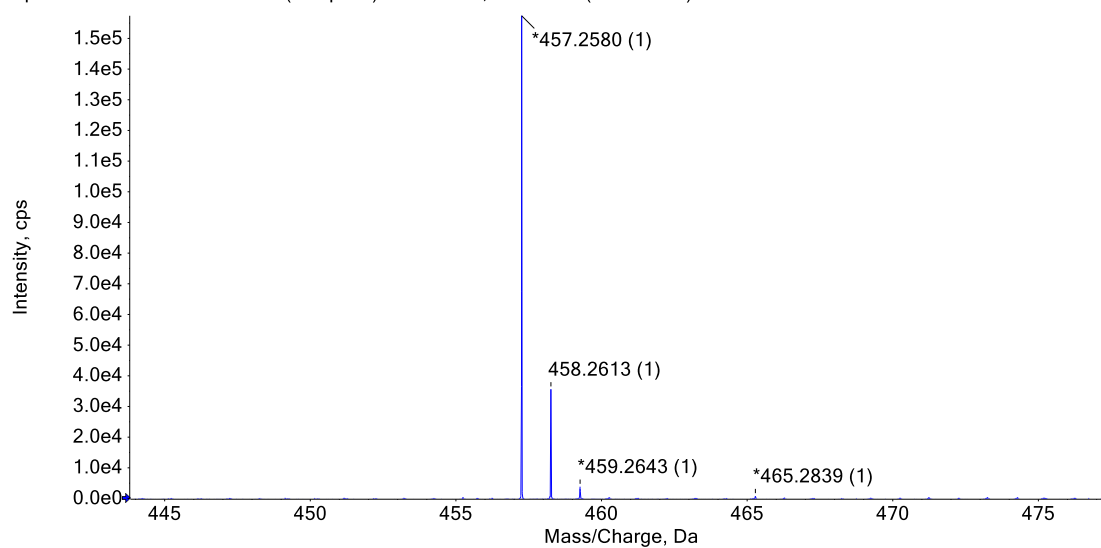

| Measured m/z | Cal m/z  | Error(mmu) | Error(ppm) | Ion Formula                                    | Ion                |
|--------------|----------|------------|------------|------------------------------------------------|--------------------|
| 457.2580     | 457.2580 | -0.5       | -1.1       | C <sub>27</sub> H <sub>37</sub> O <sub>6</sub> | [M+H] <sup>+</sup> |

**Figure S13.** The IR spectrum of **1**.

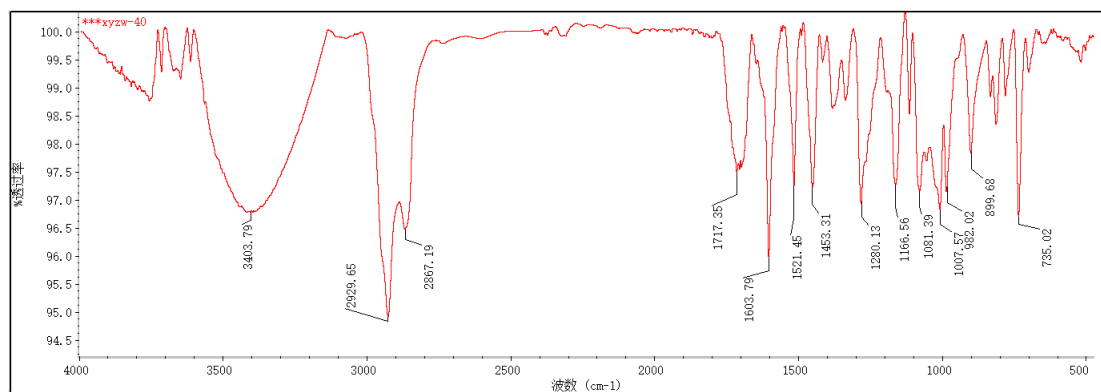



**Figure S16.** The  $^1\text{H}$ - $^1\text{H}$  COSY spectrum of **2** in  $\text{CD}_3\text{OD}$ .

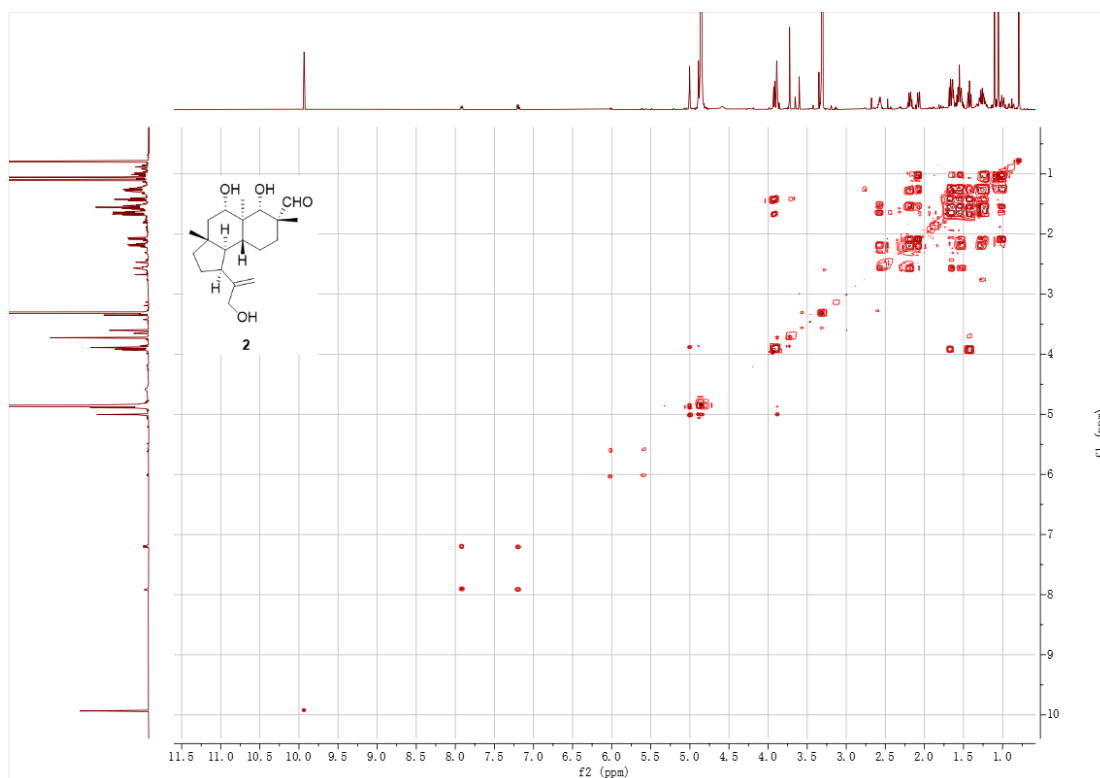

**Figure S17.** The HSQC spectrum of **2** in  $\text{CD}_3\text{OD}$ .

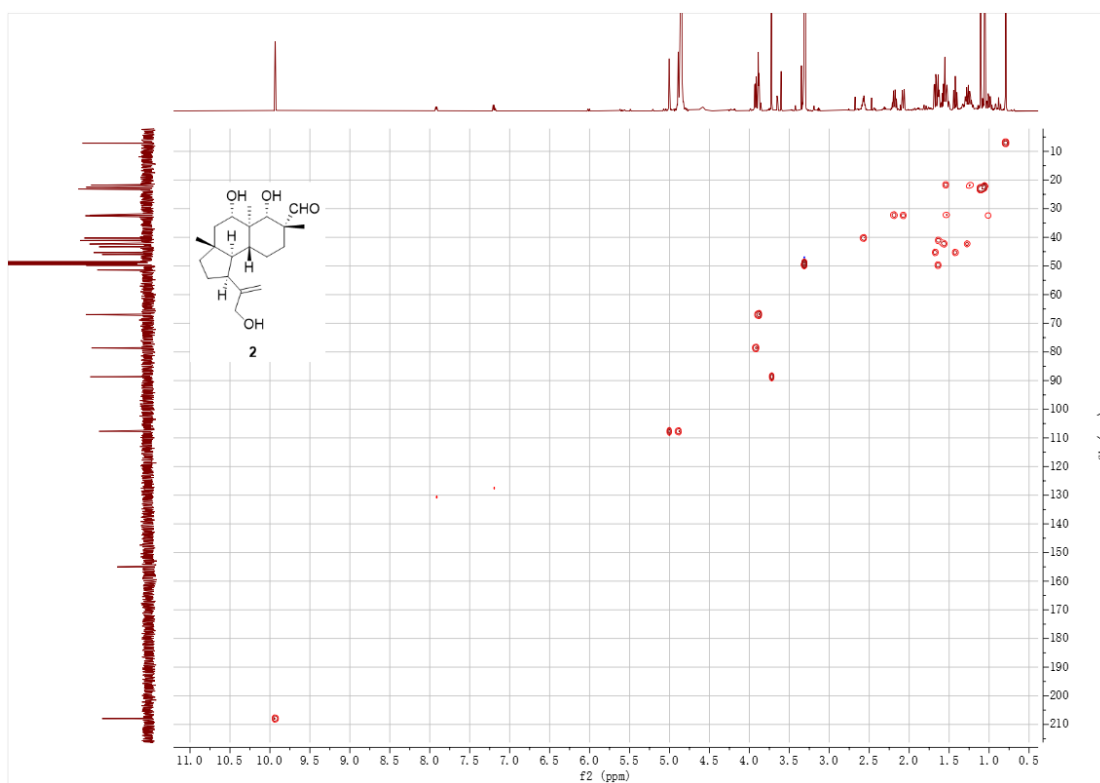

**Figure S18.** The HMBC spectrum of **2** in CD<sub>3</sub>OD.

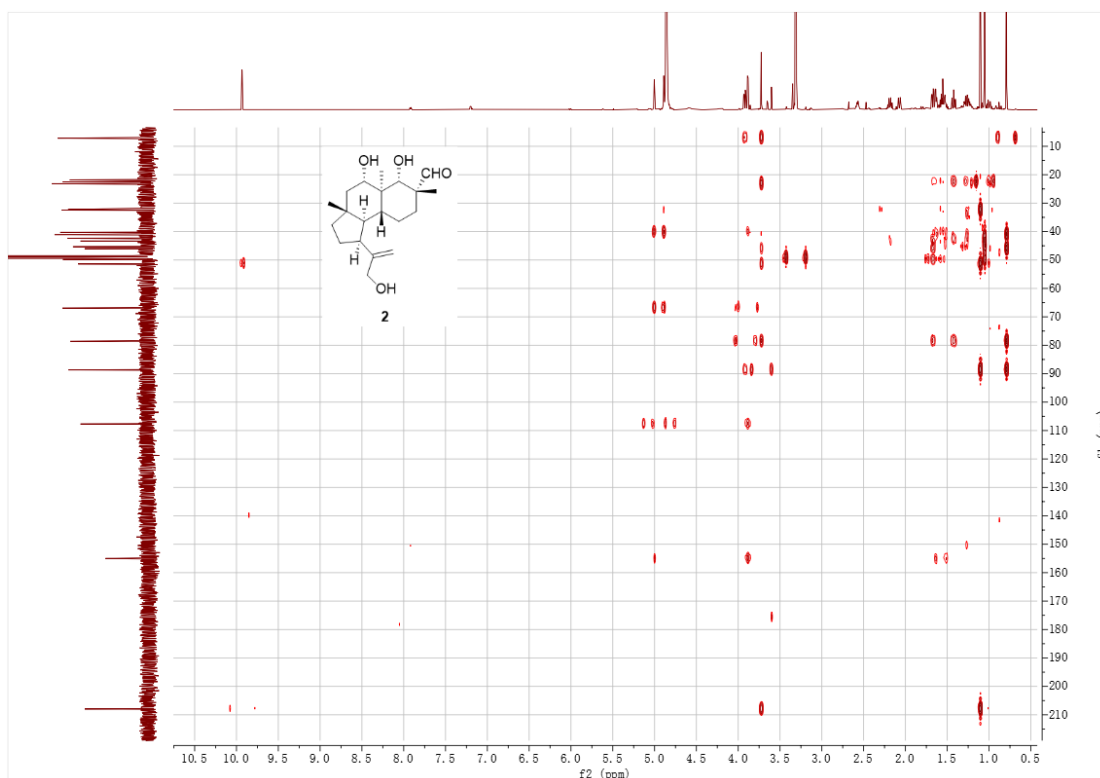

**Figure S19.** The NOESY spectrum of **2** in CD<sub>3</sub>OD.

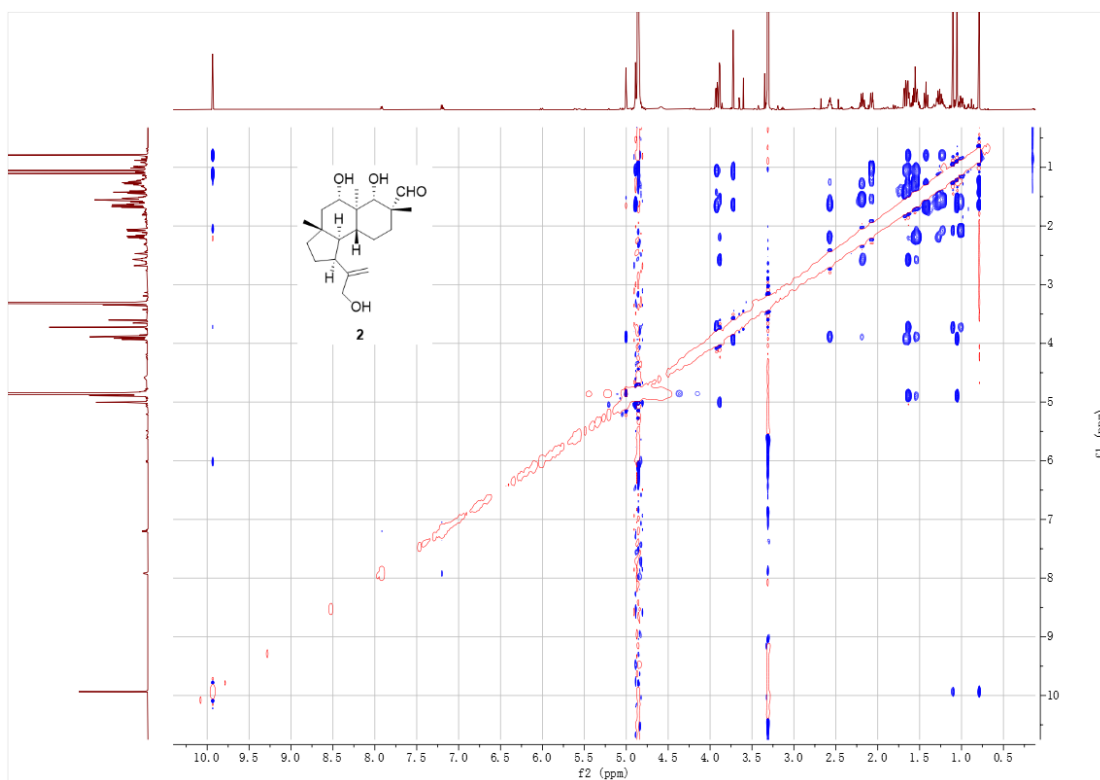

**Figure S20.** The (+)-HRESIMS spectrum of **2**.

Spectrum from XYZW-25.wiff2 (sample 1) - XYZW-25, +TOF MS (100 - 1000) from 1.346 min

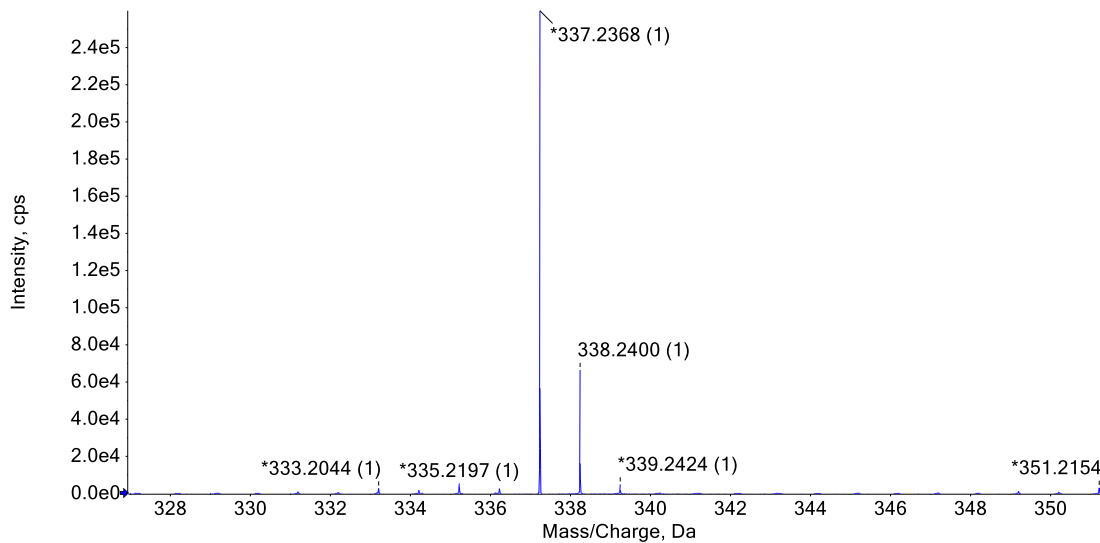

| Measured m/z | Cal m/z  | Error(mmu) | Error(ppm) | Ion Formula                                    | Ion                |
|--------------|----------|------------|------------|------------------------------------------------|--------------------|
| 337.2368     | 337.2373 | -0.5       | -1.5       | C <sub>20</sub> H <sub>33</sub> O <sub>4</sub> | [M+H] <sup>+</sup> |

**Figure S21.** The IR spectrum of **2**.

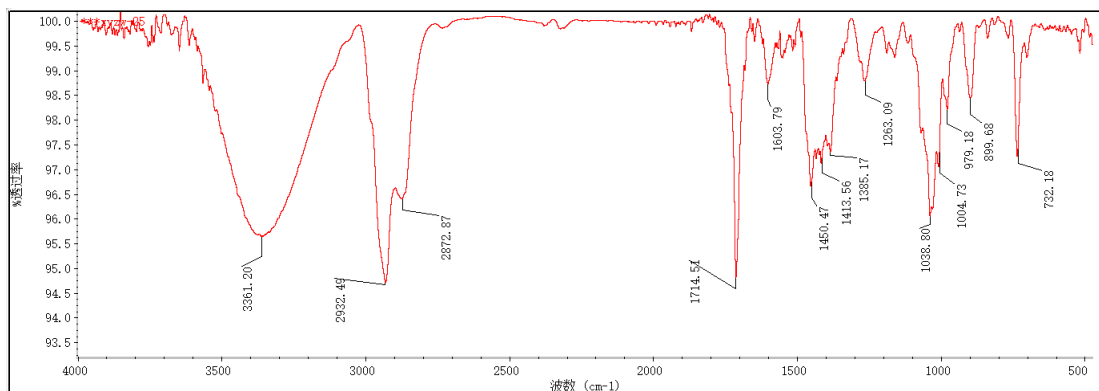

**Figure S22.** The  $^1\text{H}$  NMR spectrum of **3** in  $\text{CD}_3\text{OD}$ .

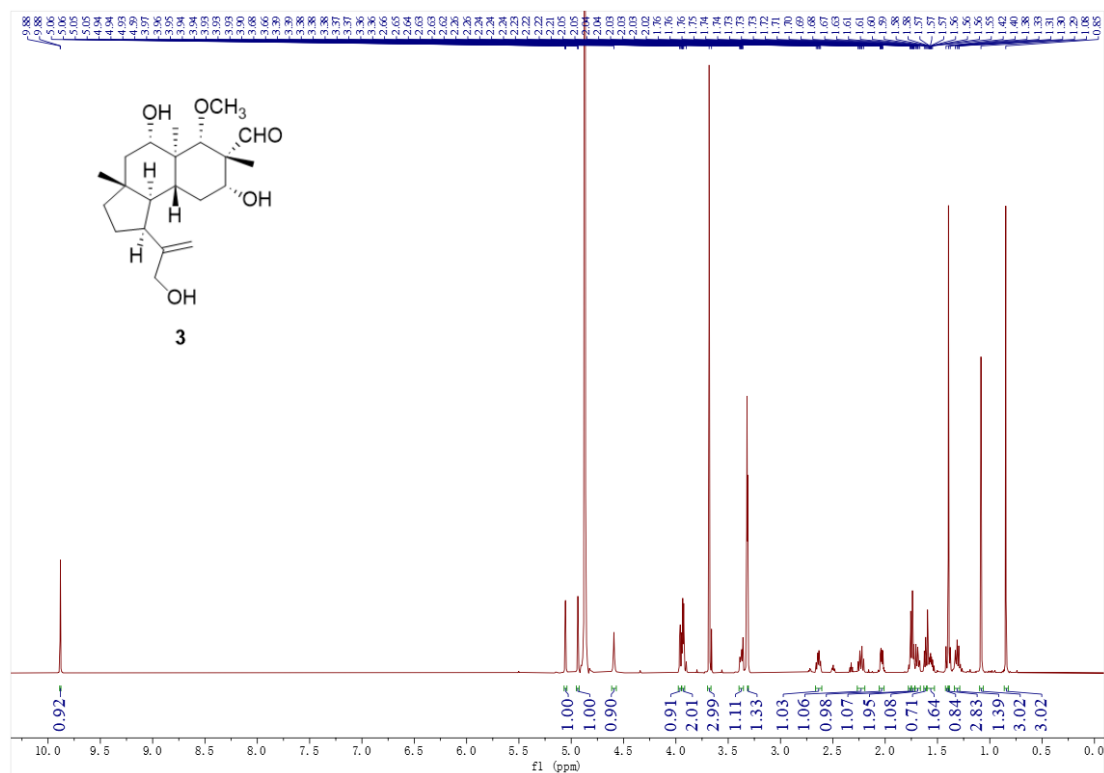

**Figure S23.** The  $^{13}\text{C}$  NMR and DEPT spectrum of **3** in  $\text{CD}_3\text{OD}$ .

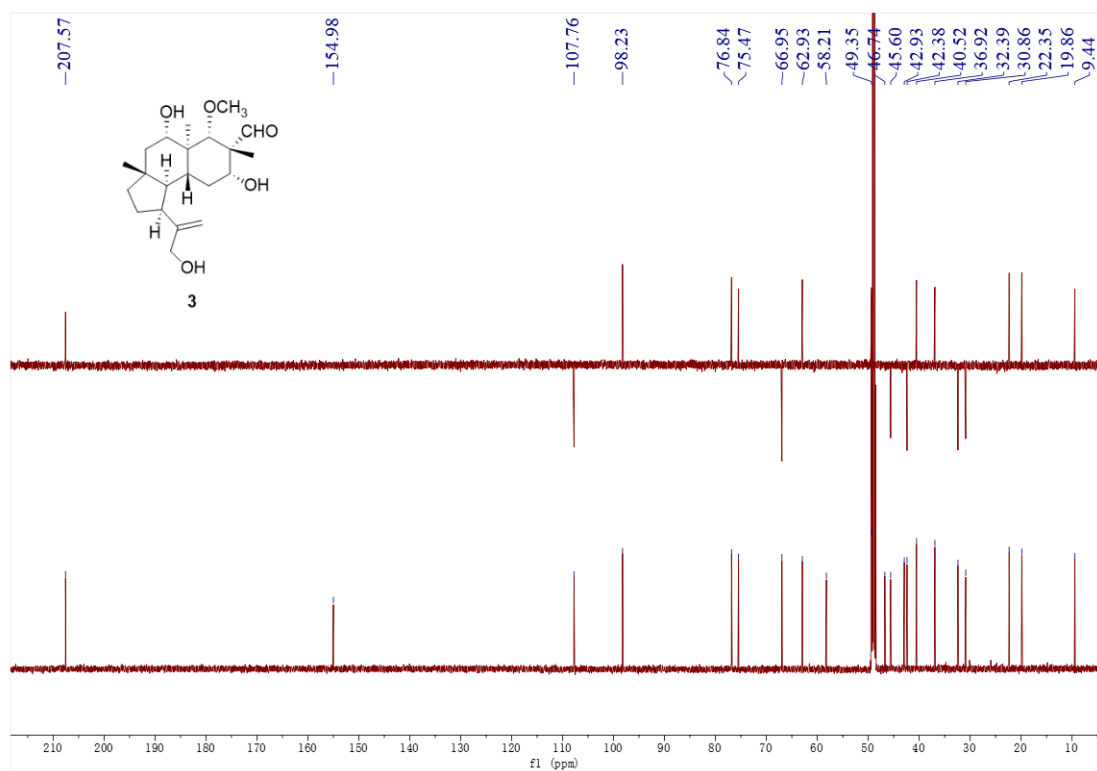

**Figure S24.** The  $^1\text{H}$ - $^1\text{H}$  COSY spectrum of **3** in  $\text{CD}_3\text{OD}$ .

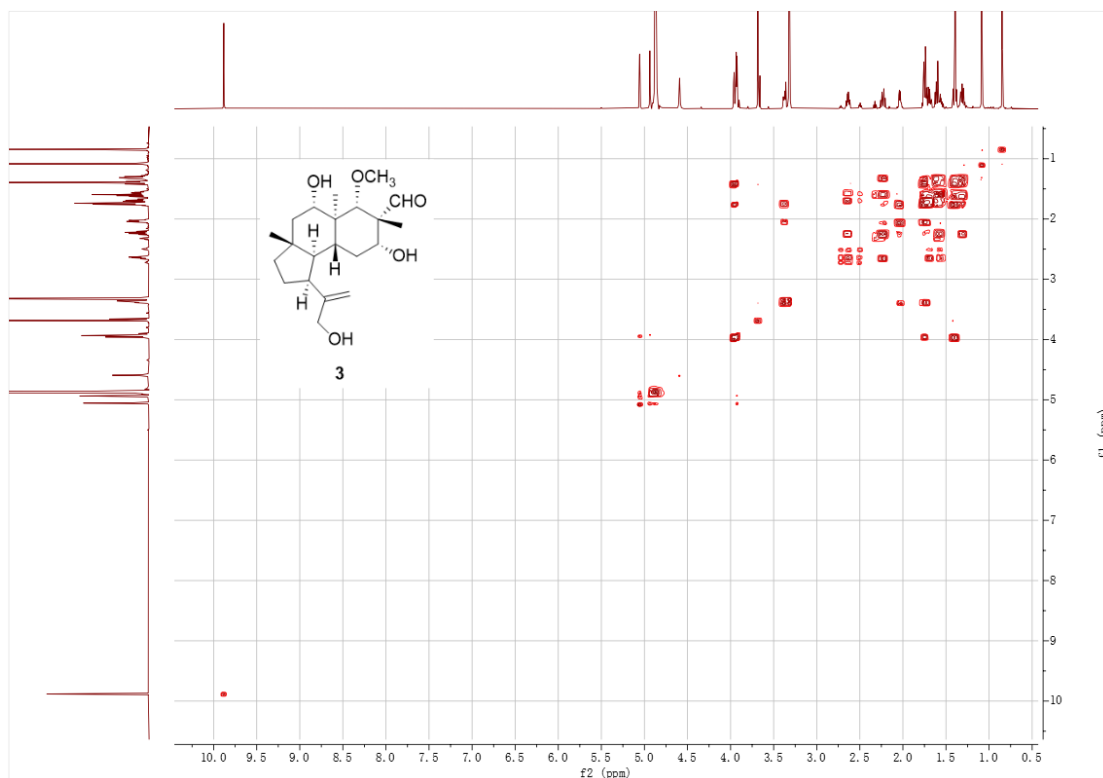

**Figure S25.** The HSQC spectrum of **3** in  $\text{CD}_3\text{OD}$ .

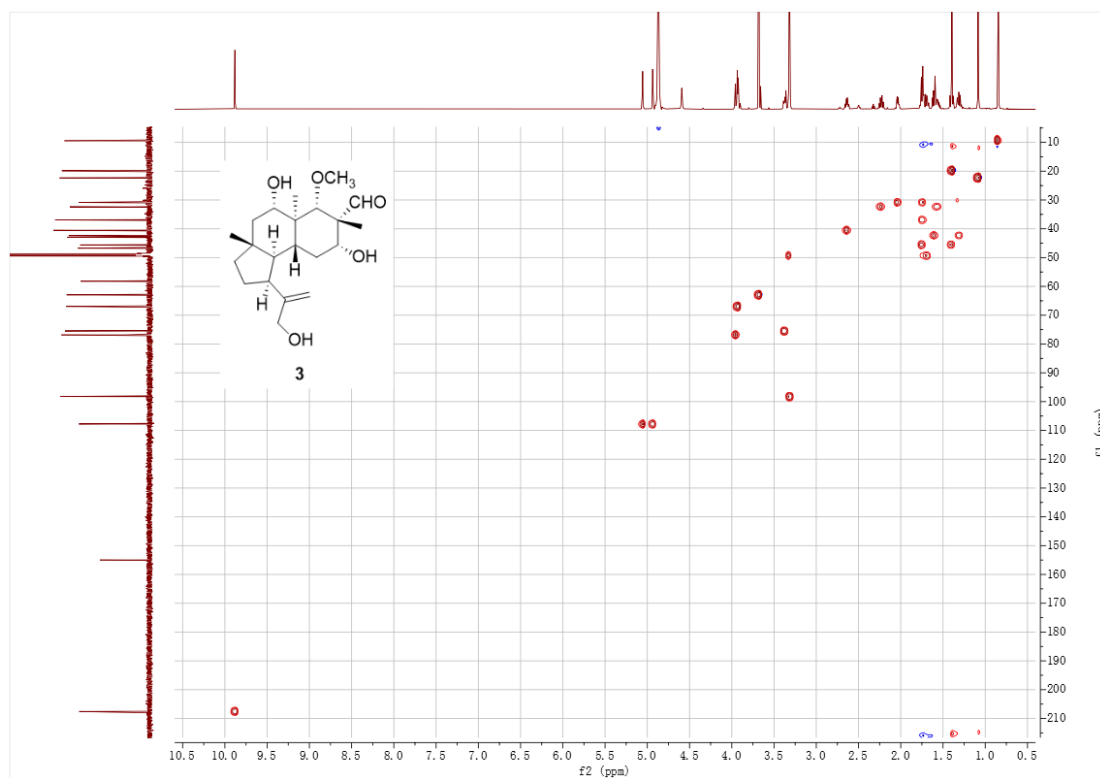

**Figure S26.** The HMBC spectrum of **3** in CD<sub>3</sub>OD.

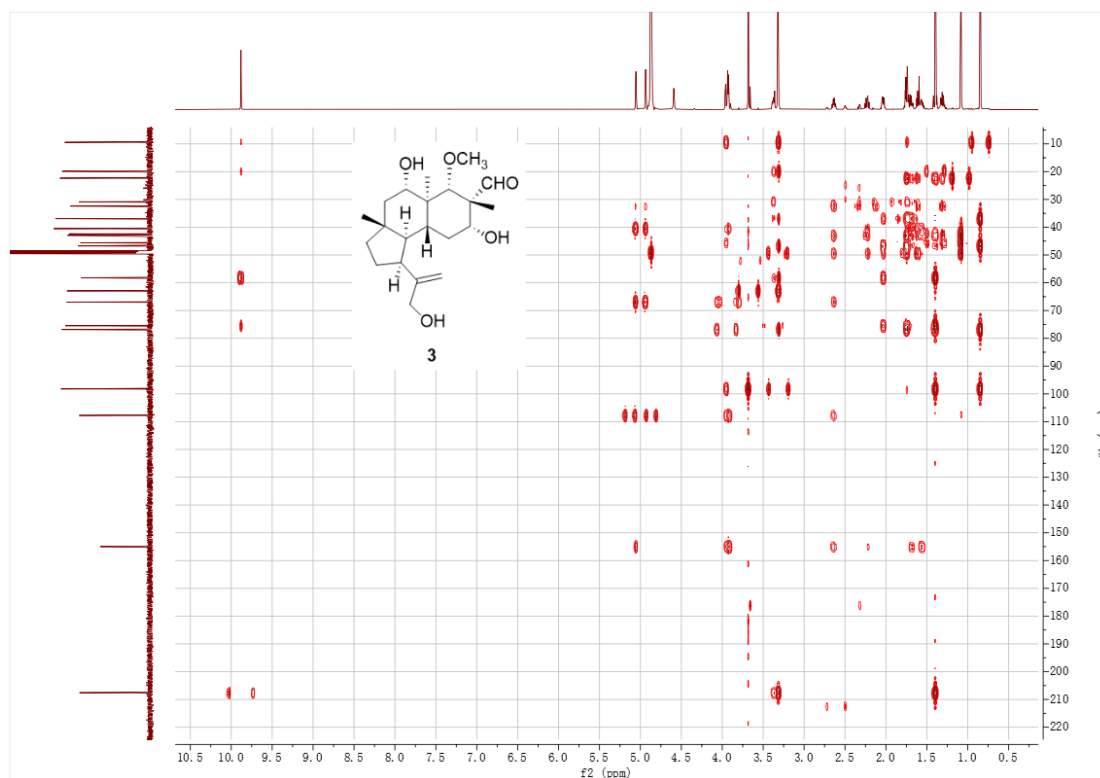

**Figure S27.** The NOESY spectrum of **3** in CD<sub>3</sub>OD.

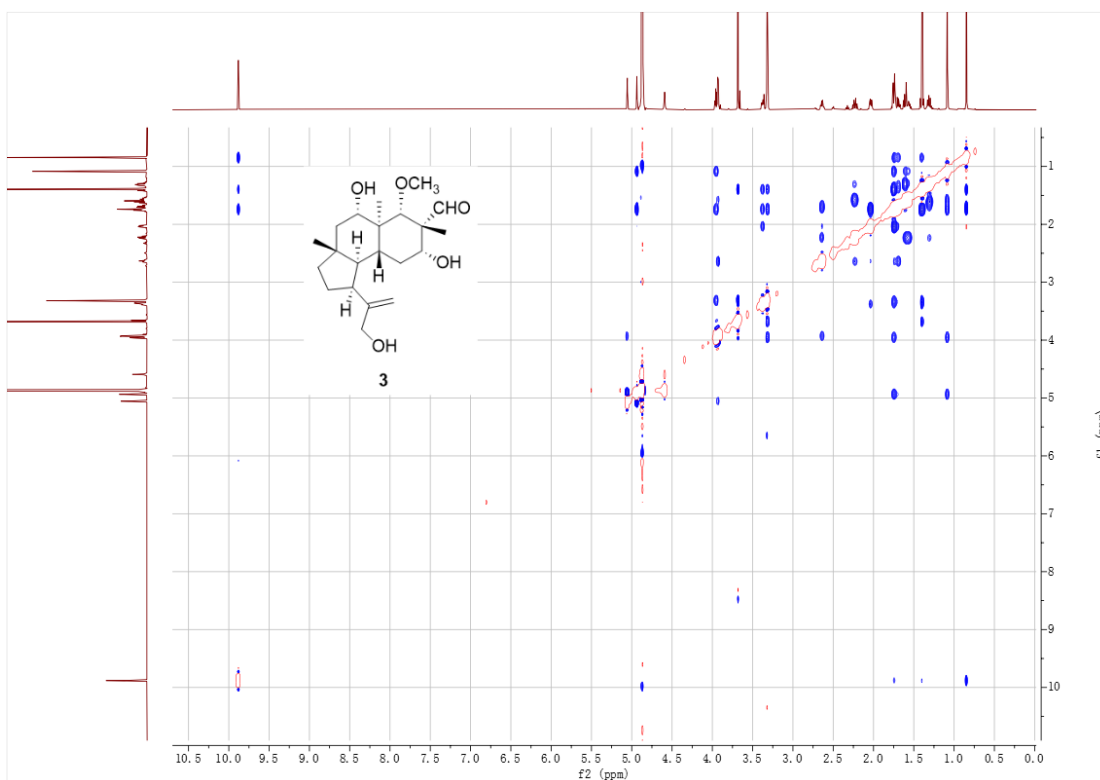

**Figure S28.** The (+)-HRESIMS spectrum of **3**.

Spectrum from XYZW-2.wiff2 (sample 1) - XYZW-2, +TOF MS (100 - 1000) from 1.346 min

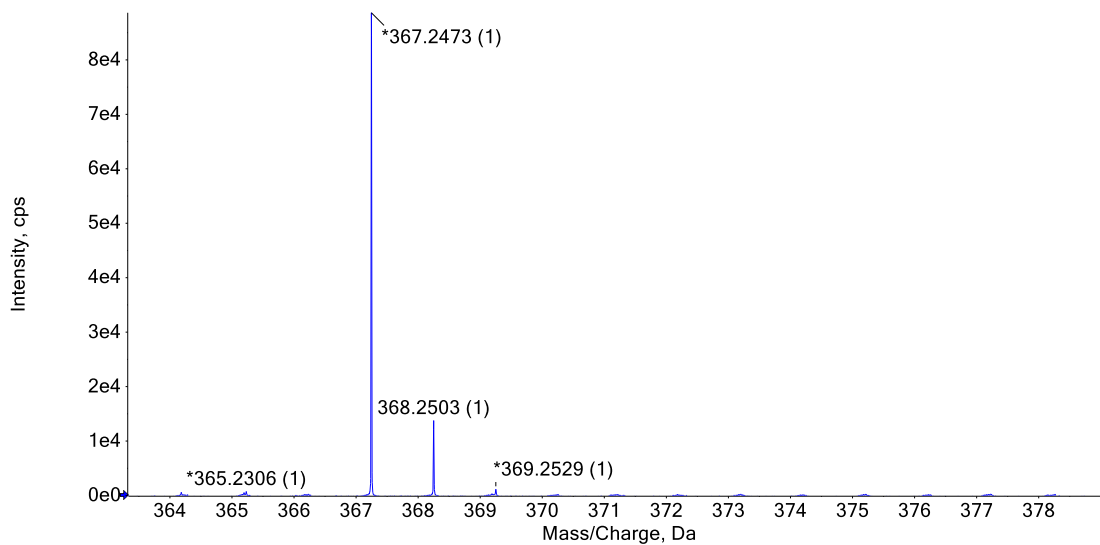

| Measured m/z | Cal m/z  | Error(mmu) | Error(ppm) | Ion Formula                                    | Ion                |
|--------------|----------|------------|------------|------------------------------------------------|--------------------|
| 367.2473     | 367.2479 | -0.6       | -1.5       | C <sub>21</sub> H <sub>35</sub> O <sub>5</sub> | [M+H] <sup>+</sup> |

**Figure S29.** The IR spectrum of **3**.

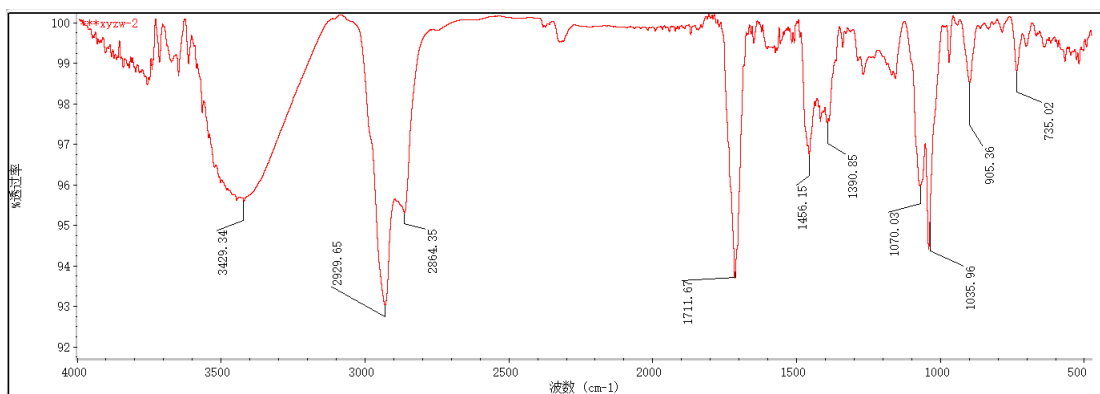

**Figure S30.** The  $^1\text{H}$  NMR spectrum of **4** in  $\text{CD}_3\text{OD}$ .

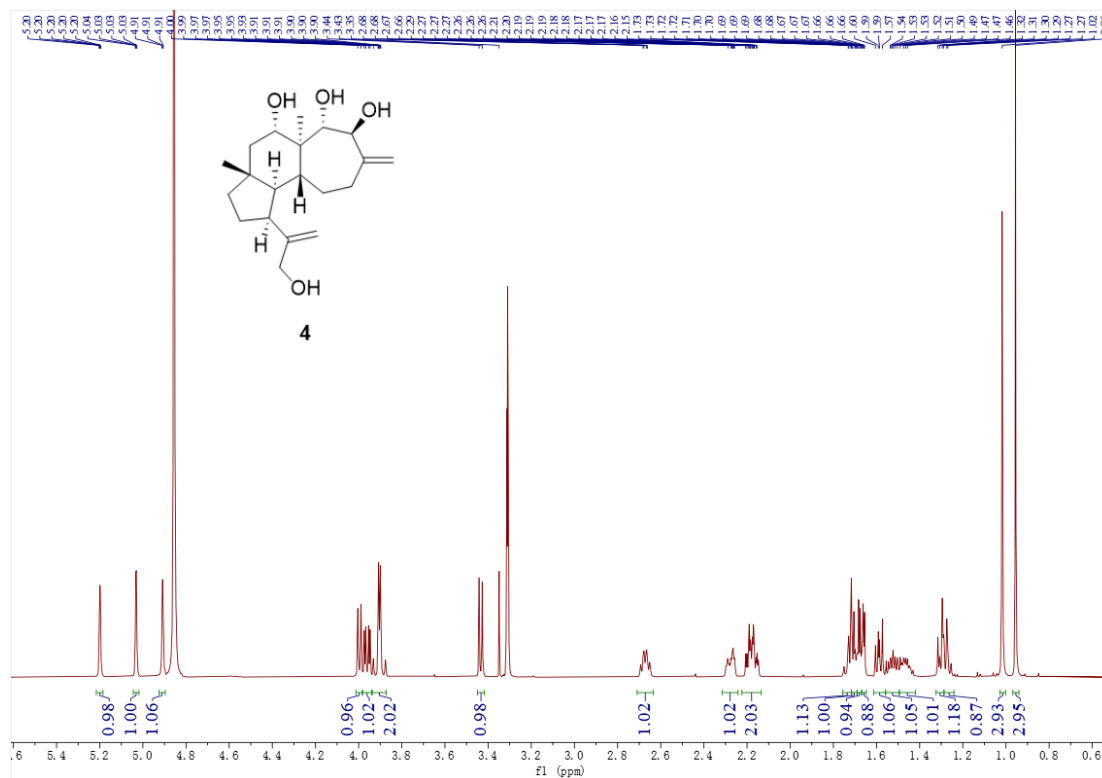

**Figure S31.** The  $^{13}\text{C}$  NMR and DEPT spectrum of **4** in  $\text{CD}_3\text{OD}$ .

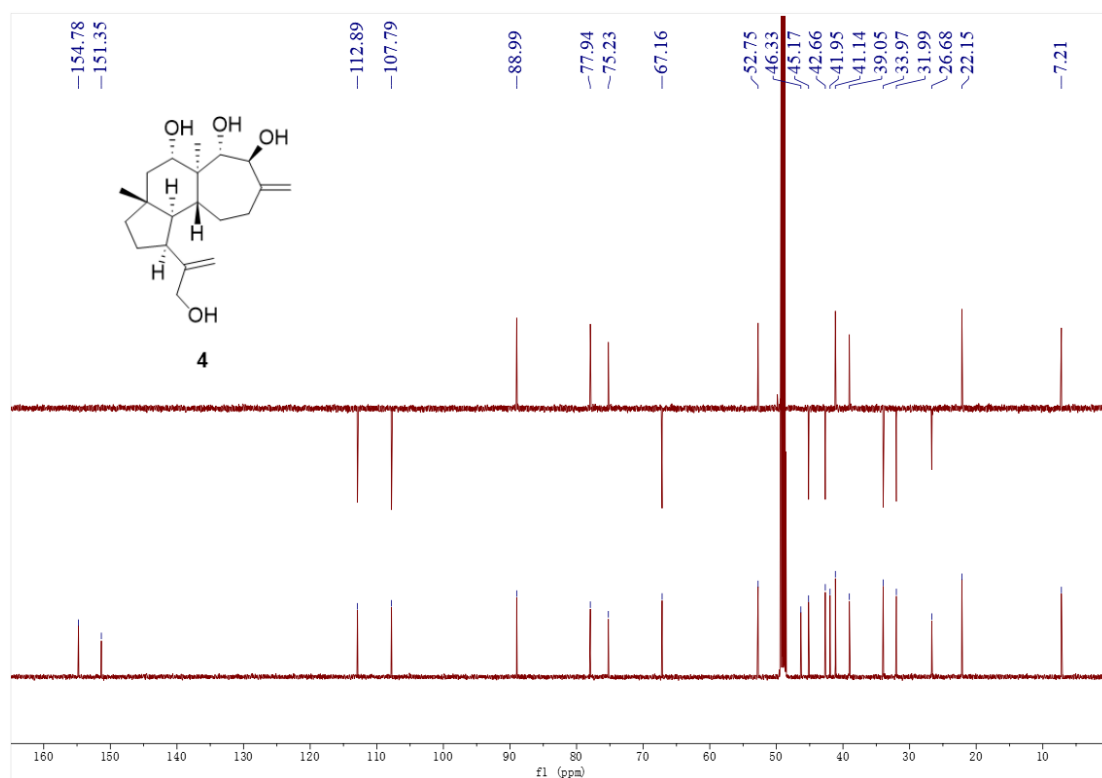

**Figure S32.** The  $^1\text{H}$ - $^1\text{H}$  COSY spectrum of **4** in  $\text{CD}_3\text{OD}$ .

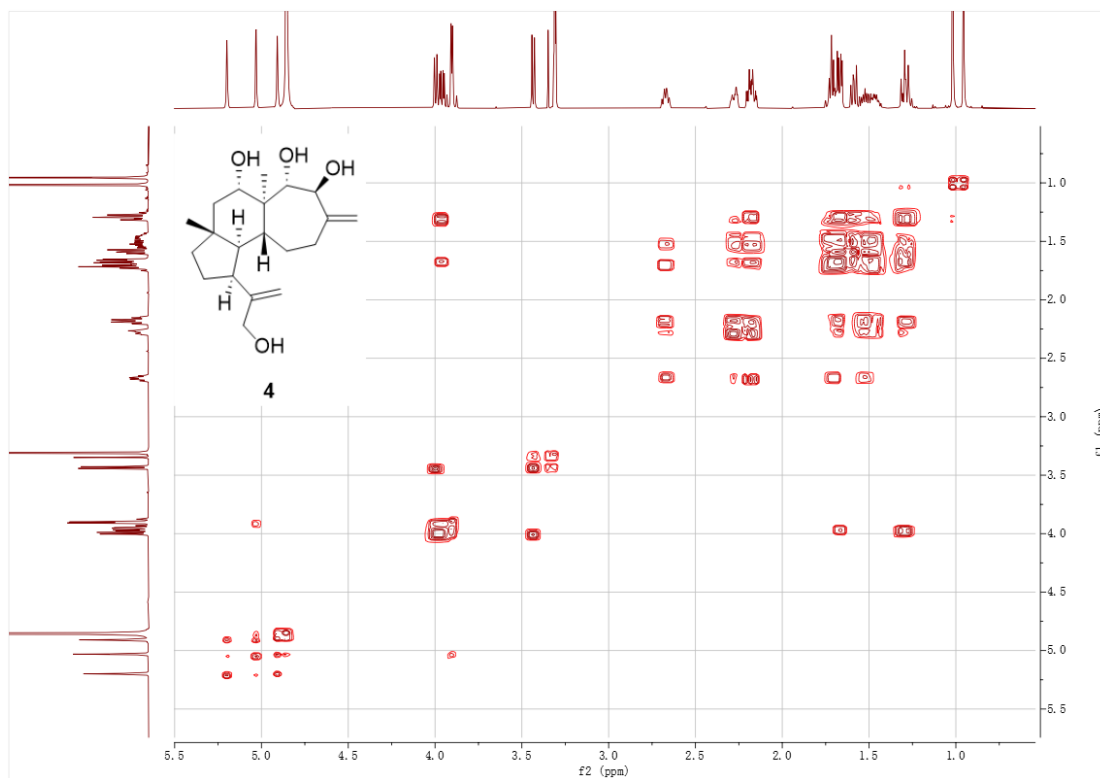

**Figure S33.** The HSQC spectrum of **4** in  $\text{CD}_3\text{OD}$ .

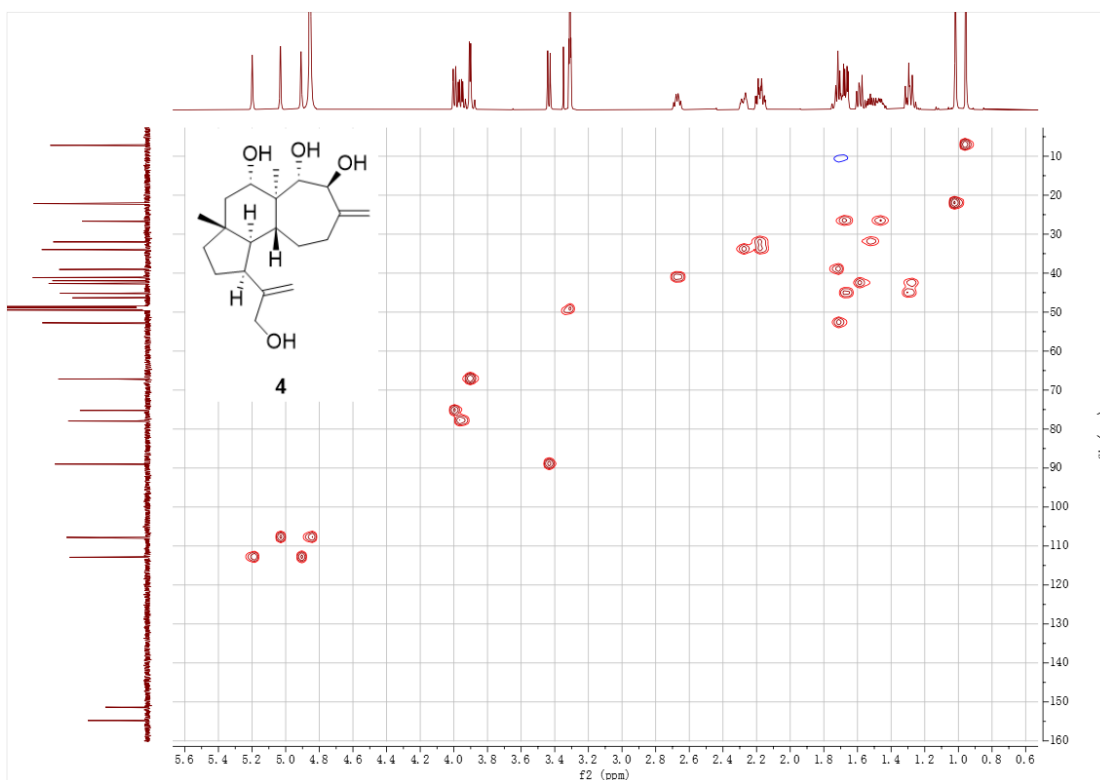

**Figure S34.** The HMBC spectrum of **4** in CD<sub>3</sub>OD.

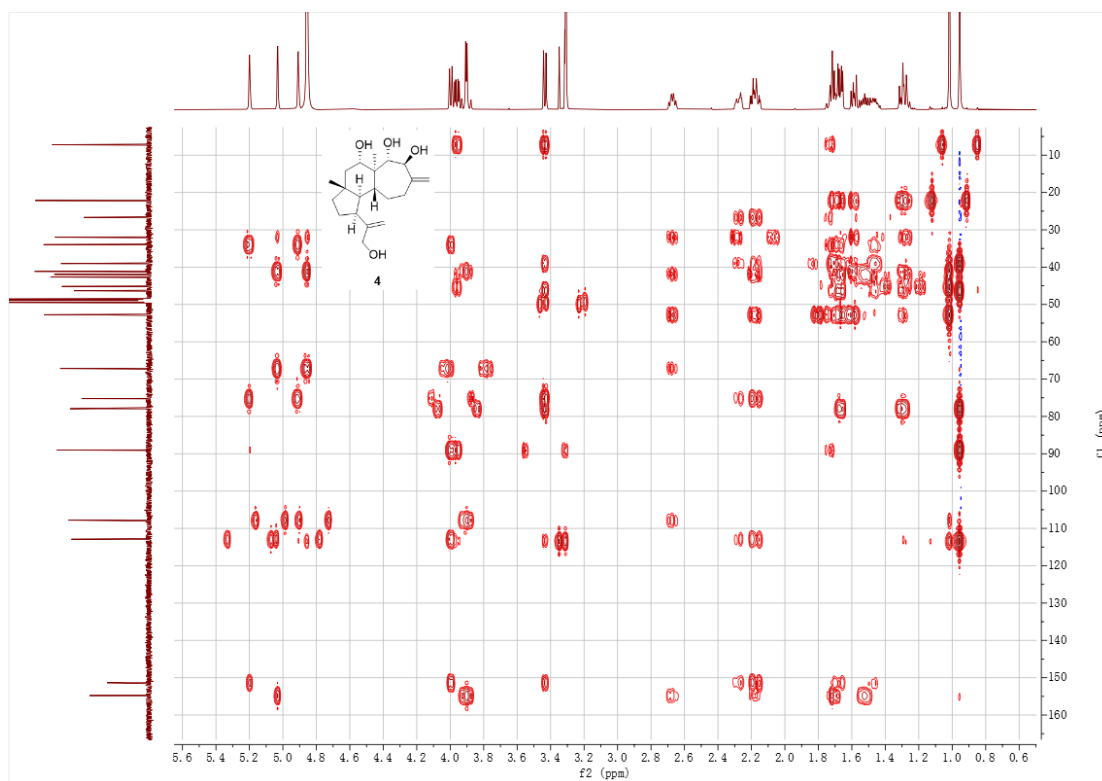

**Figure S35.** The NOESY spectrum of **4** in CD<sub>3</sub>OD.

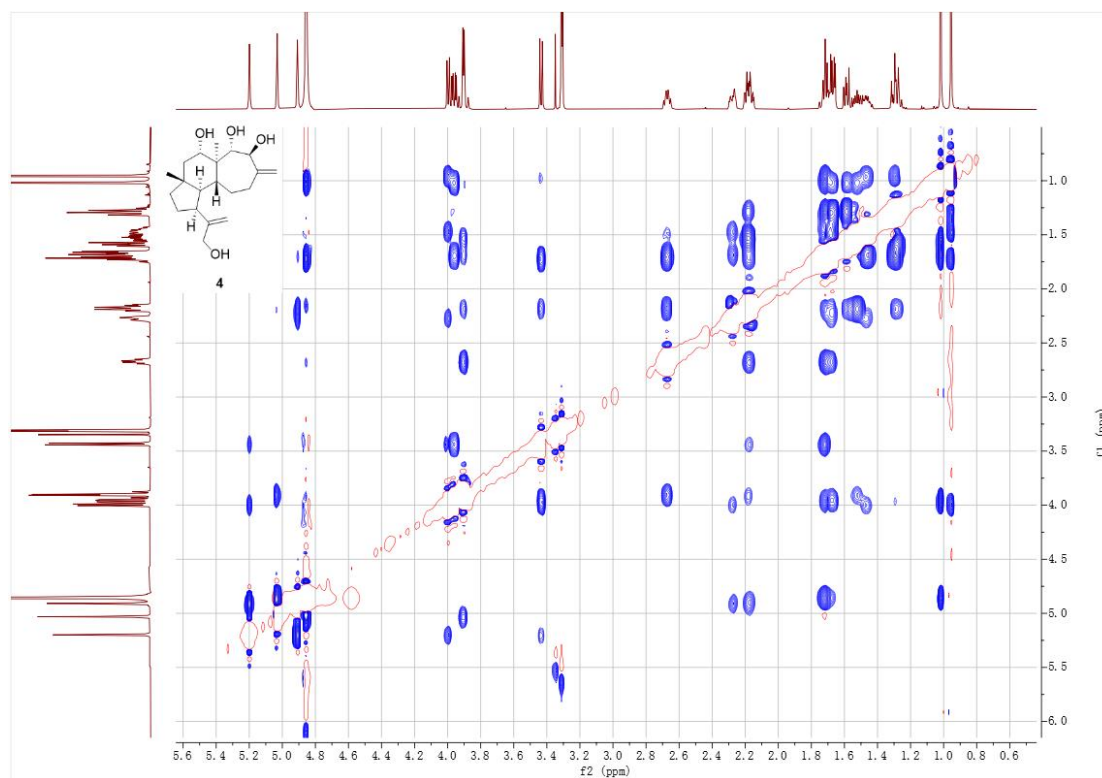

**Figure S36.** The (+)-HRESIMS spectrum of **4**.

Spectrum from XYZW-17.wiff2 (sample 1) - XYZW-17, +TOF MS (100 - 1000) from 1.370 min

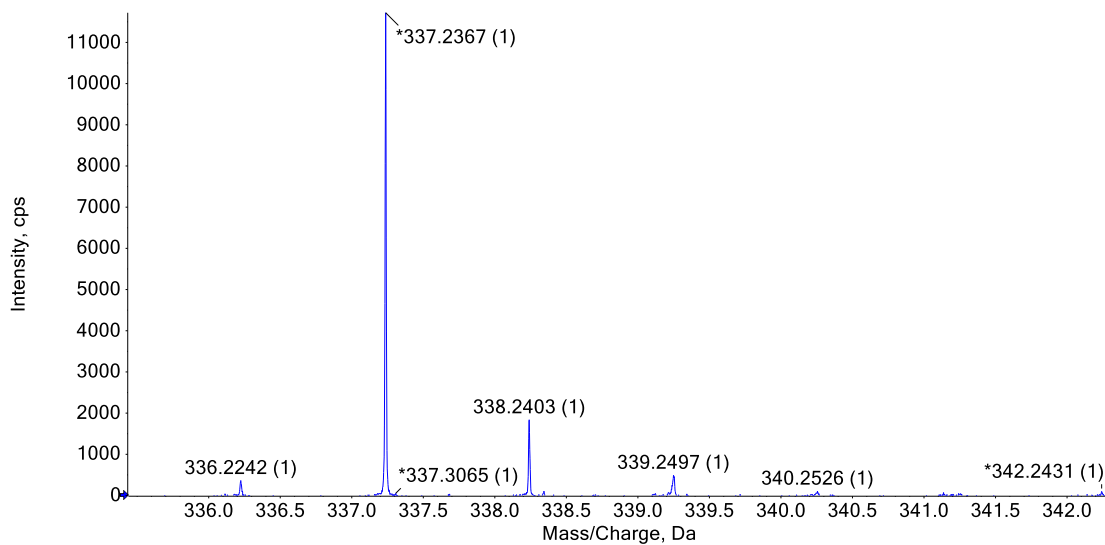

| Measured m/z | Cal m/z  | Error(mmu) | Error(ppm) | Ion Formula                                    | Ion                |
|--------------|----------|------------|------------|------------------------------------------------|--------------------|
| 337.2367     | 337.2373 | -0.6       | -2.0       | C <sub>20</sub> H <sub>33</sub> O <sub>4</sub> | [M+H] <sup>+</sup> |

**Figure S37.** The IR spectrum of **4**.

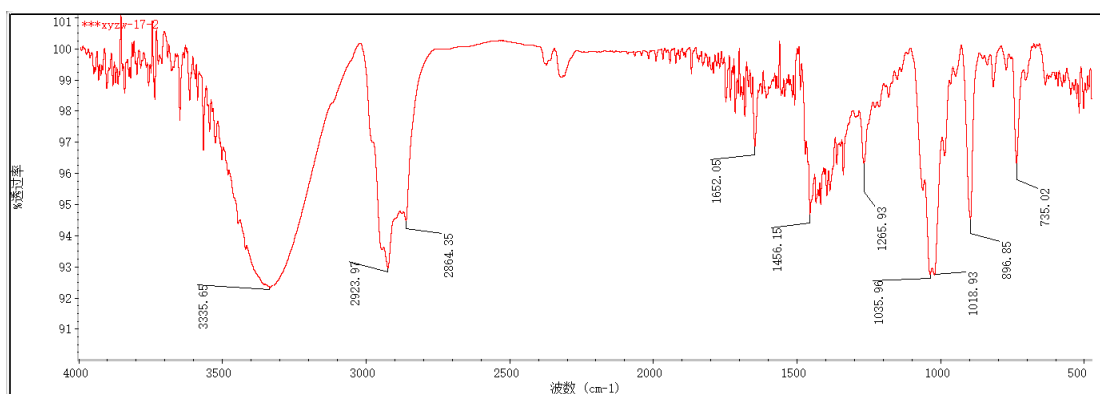

**Figure S38.** The  $^1\text{H}$  NMR spectrum of **5** in  $\text{CD}_3\text{OD}$ .

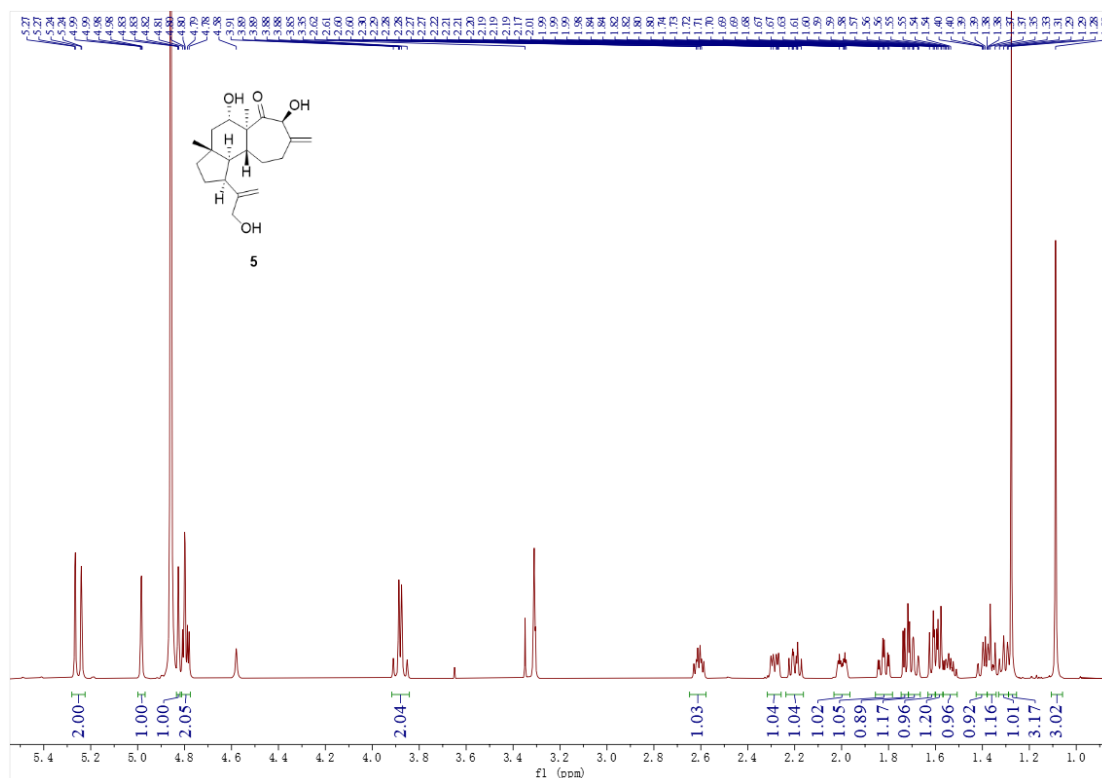

**Figure S39.** The  $^{13}\text{C}$  NMR and DEPT spectrum of **5** in  $\text{CD}_3\text{OD}$ .

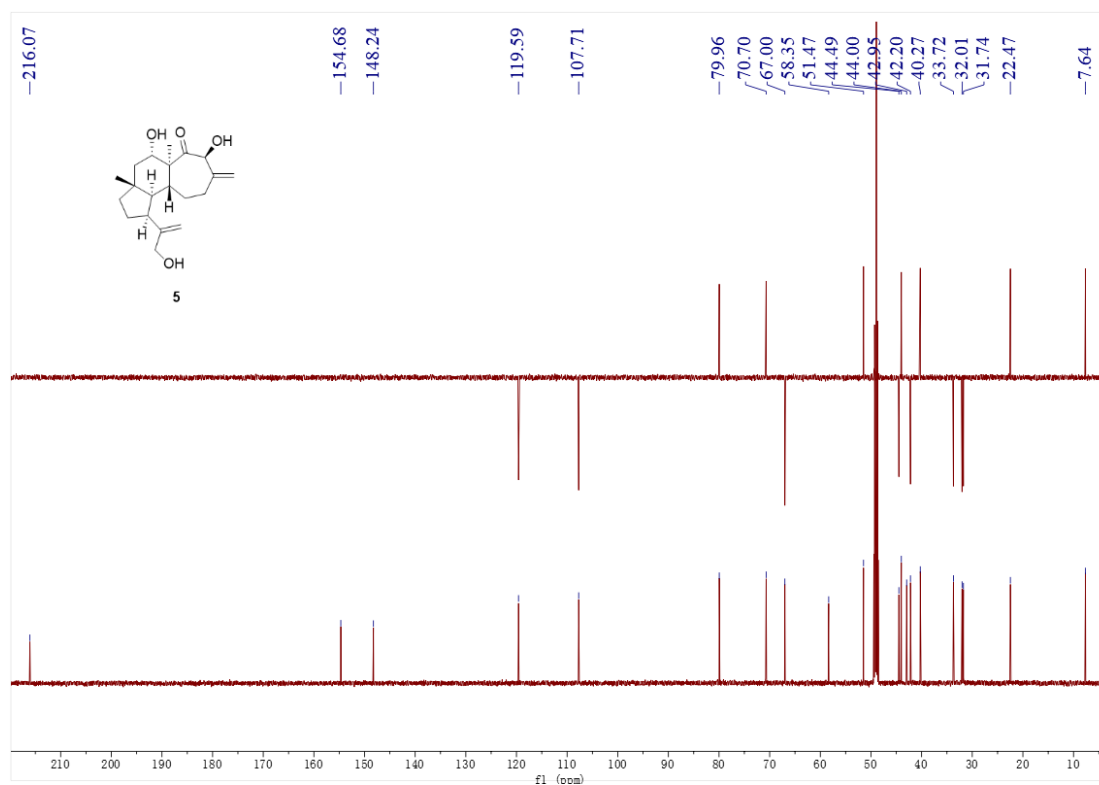

**Figure S40.** The  $^1\text{H}$ - $^1\text{H}$  COSY spectrum of **5** in  $\text{CD}_3\text{OD}$ .

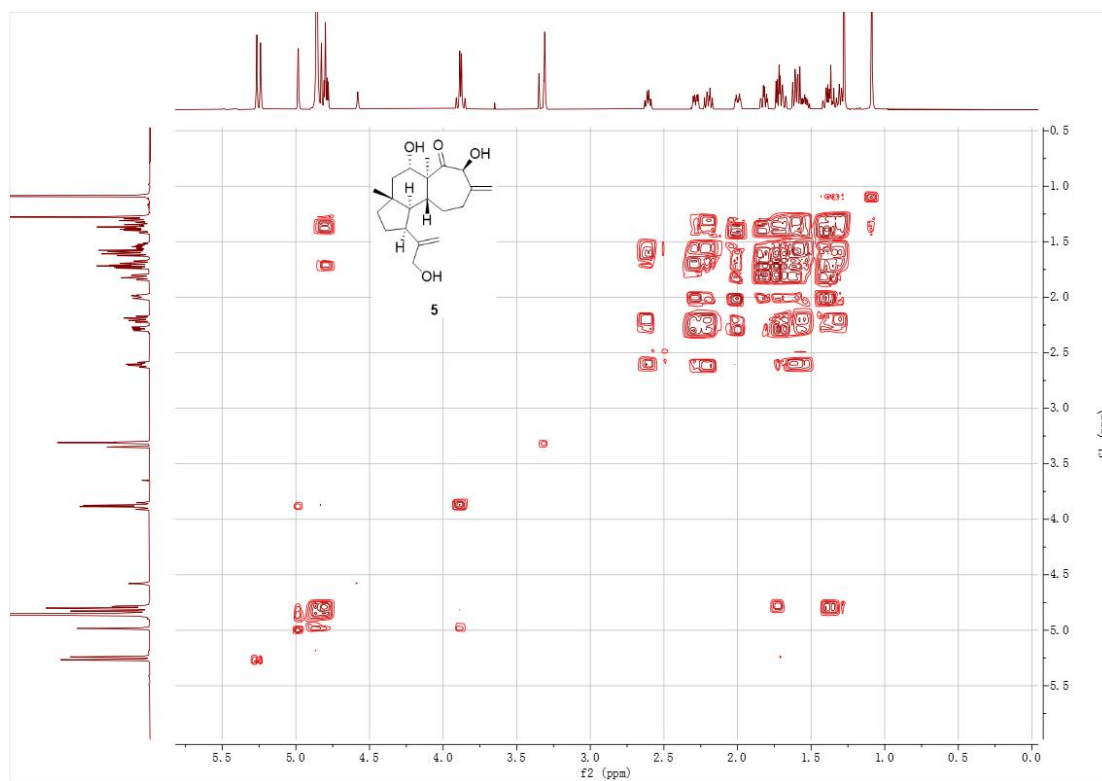

**Figure S41.** The HSQC spectrum of **5** in  $\text{CD}_3\text{OD}$ .

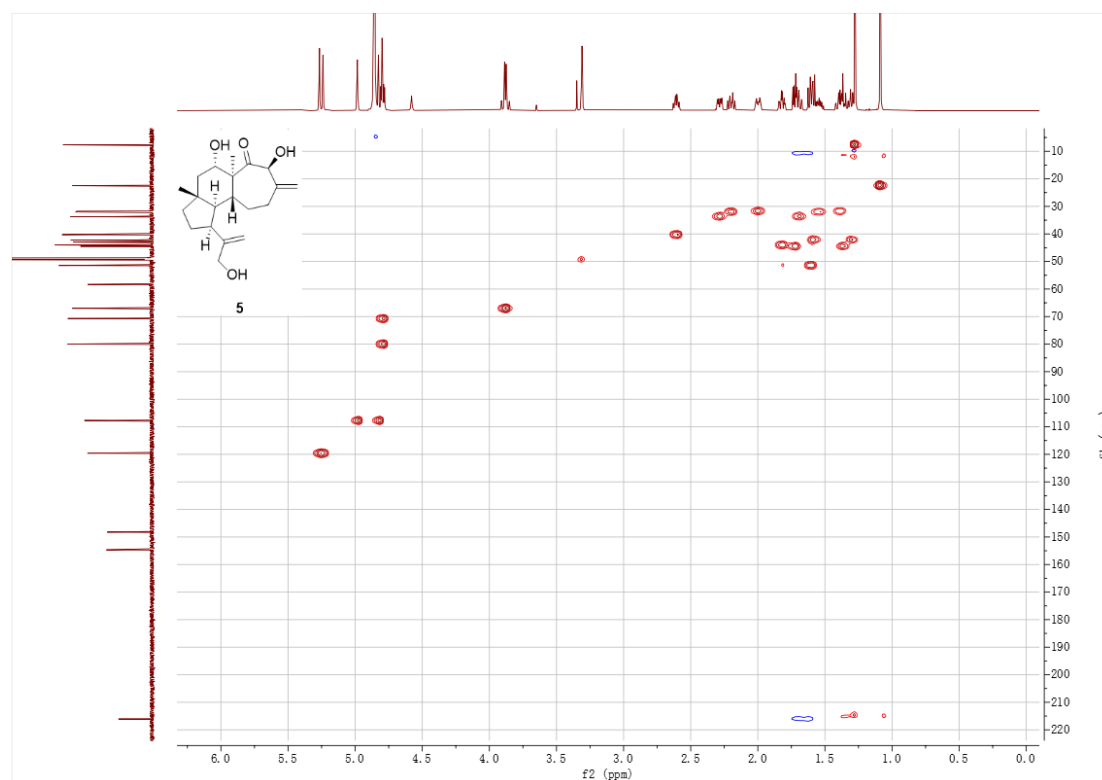

**Figure S42.** The HMBC spectrum of **5** in CD<sub>3</sub>OD.

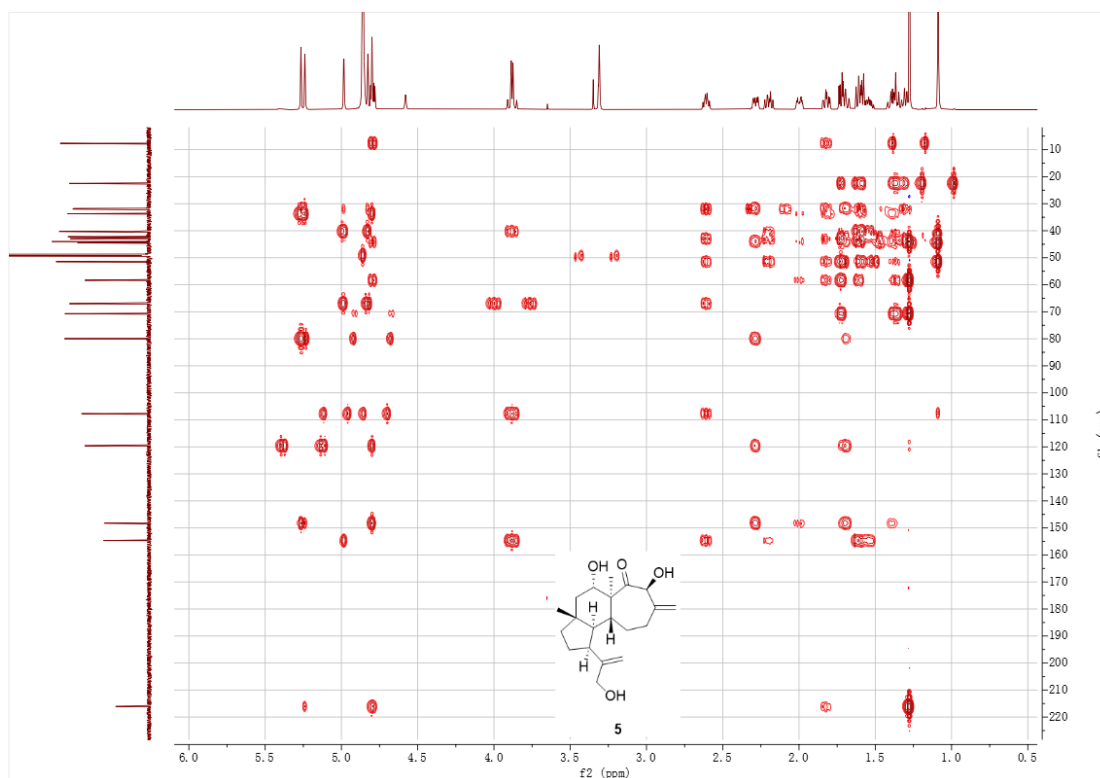

**Figure S43.** The NOESY spectrum of **5** in CD<sub>3</sub>OD.

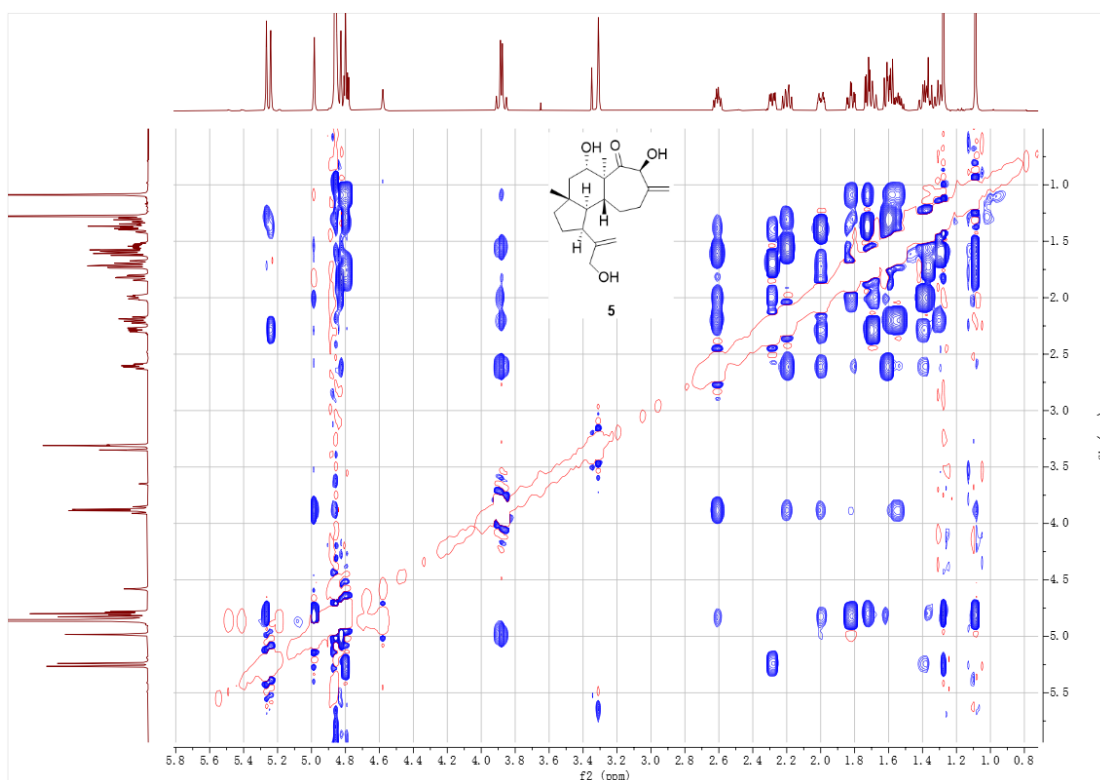

**Figure S44.** The (+)-HRESIMS spectrum of **5**.

Spectrum from XYZW-1.wiff2 (sample 1) - XYZW-1, +TOF MS (100 - 1000) from 1.358 min

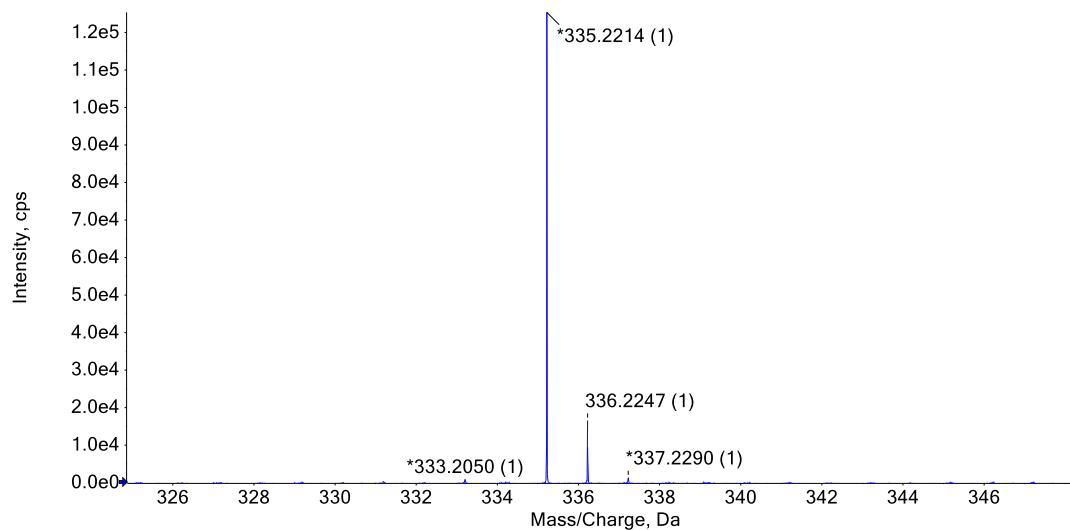

| Measured m/z | Cal m/z  | Error(mmu) | Error(ppm) | Ion Formula                                    | Ion                |
|--------------|----------|------------|------------|------------------------------------------------|--------------------|
| 335.2214     | 335.2217 | -0.3       | -1.0       | C <sub>20</sub> H <sub>31</sub> O <sub>4</sub> | [M+H] <sup>+</sup> |

**Figure S45.** The IR spectrum of **5**.

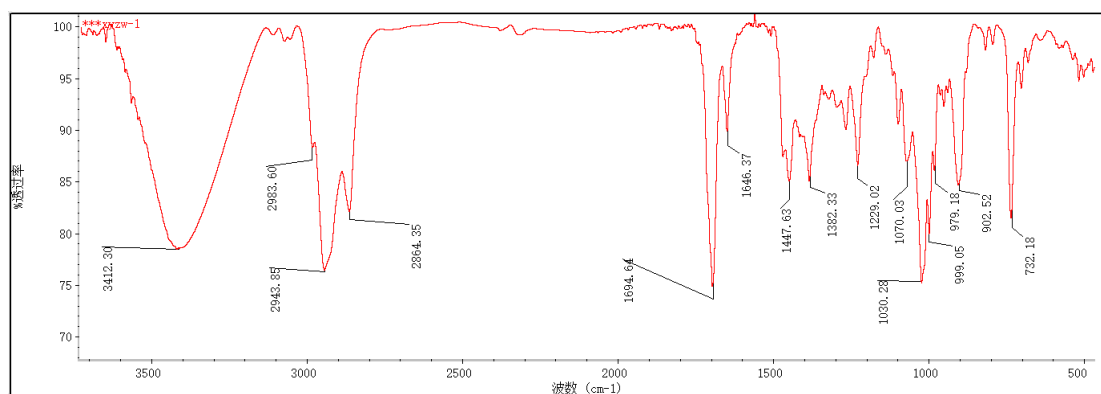

**Figure S46.** The  $^1\text{H}$  NMR spectrum of **6** in  $\text{CD}_3\text{OD}$ .

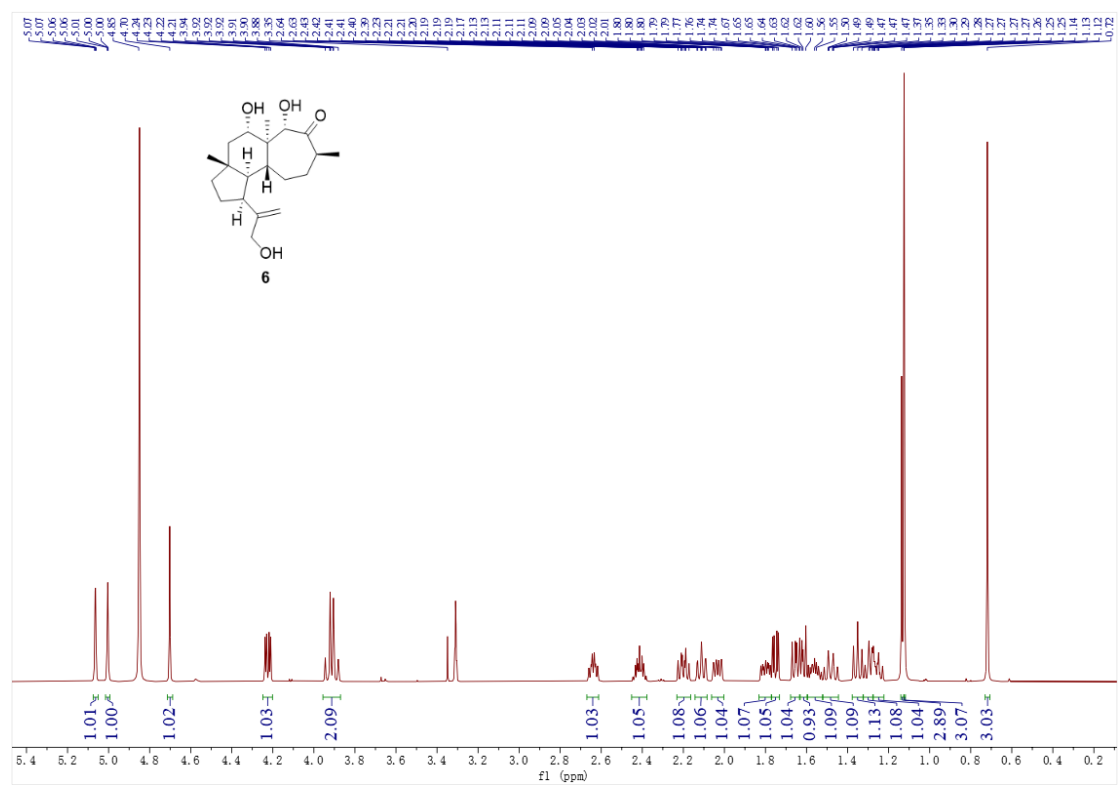

**Figure S47.** The  $^{13}\text{C}$  NMR and DEPT spectrum of **6** in  $\text{CD}_3\text{OD}$ .

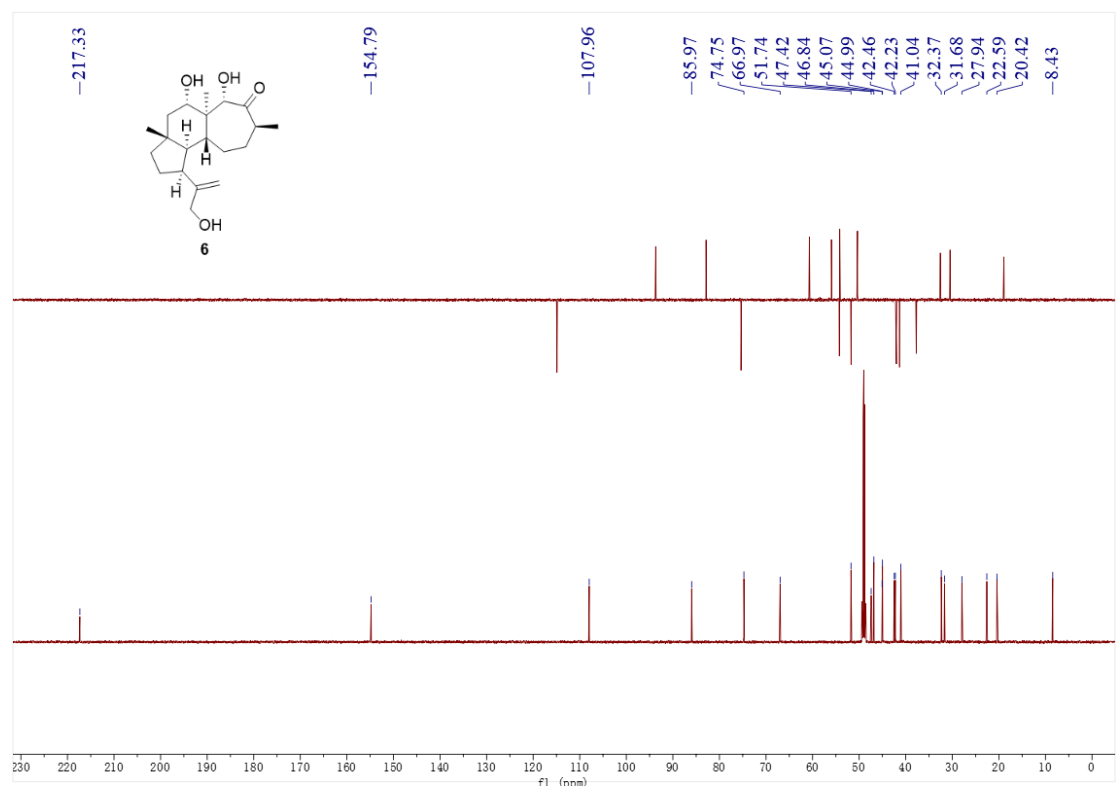

**Figure S48.** The  $^1\text{H}$ - $^1\text{H}$  COSY spectrum of **6** in  $\text{CD}_3\text{OD}$ .

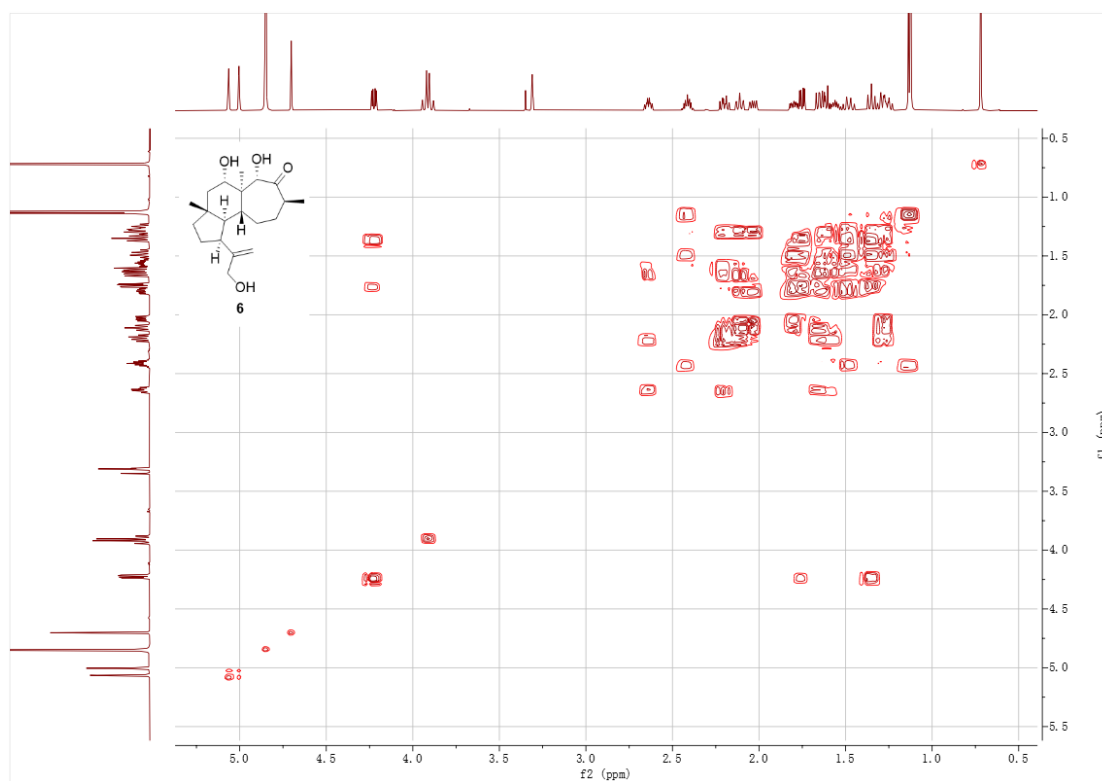

**Figure S49.** The HSQC spectrum of **6** in  $\text{CD}_3\text{OD}$ .

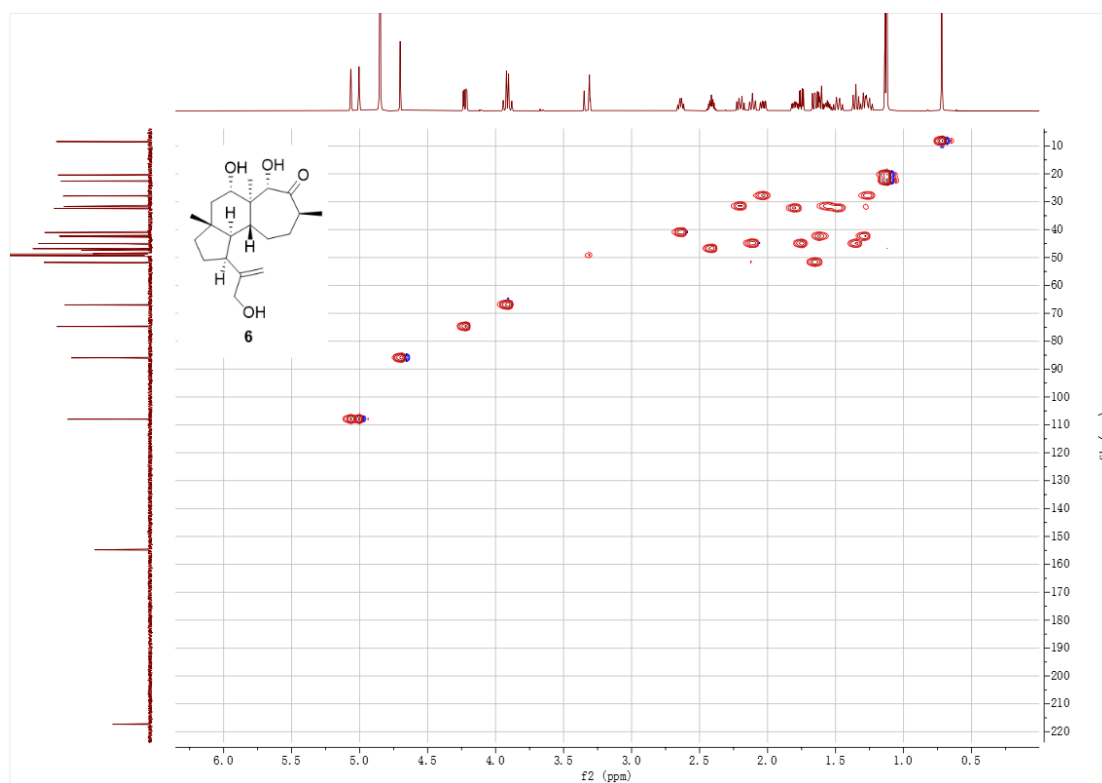

**Figure S50.** The HMBC spectrum of **6** in CD<sub>3</sub>OD.

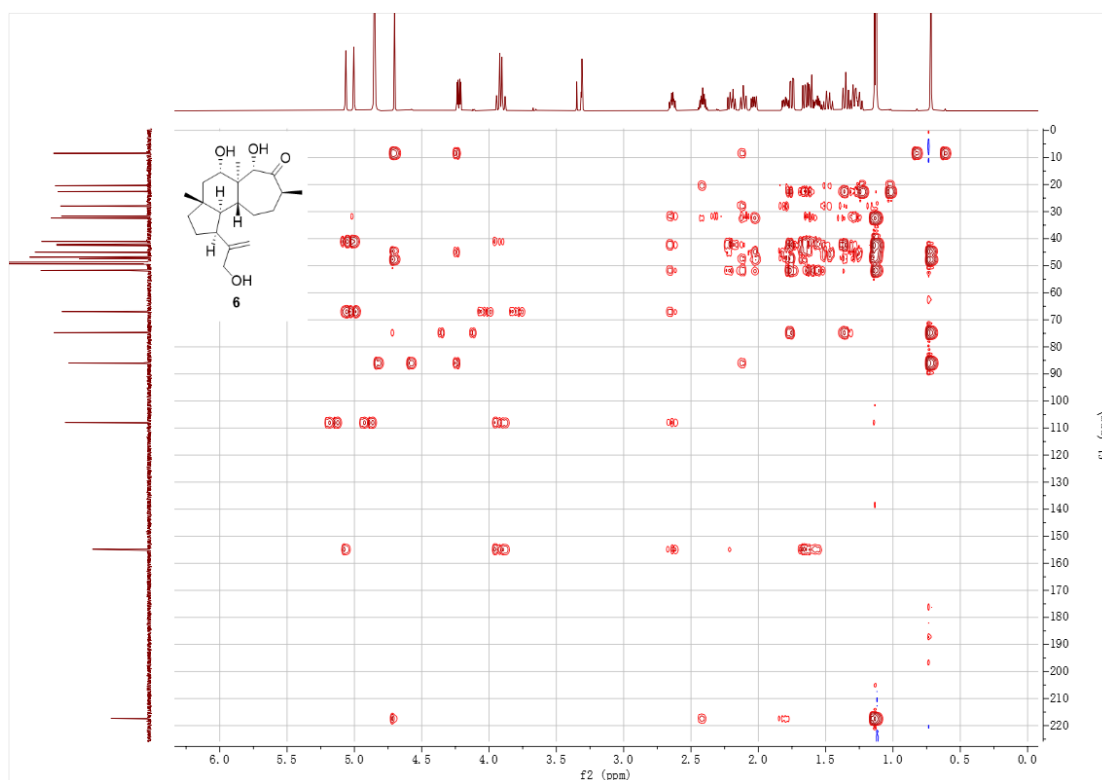

**Figure S51.** The NOESY spectrum of **6** in CD<sub>3</sub>OD.

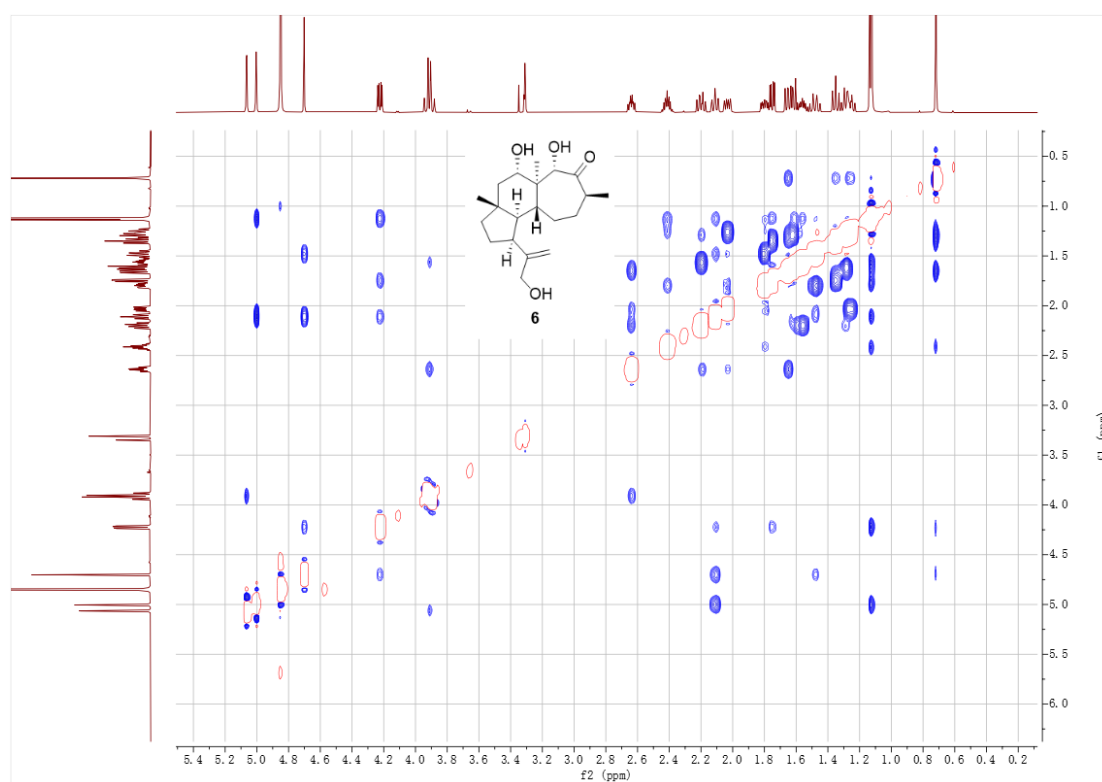

**Figure S52.** The (+)-HRESIMS spectrum of **6**.

Spectrum from XYZW-43.wiff2 (sample 1) - XYZW-43, +TOF MS (100 - 1000) from 1.406 min

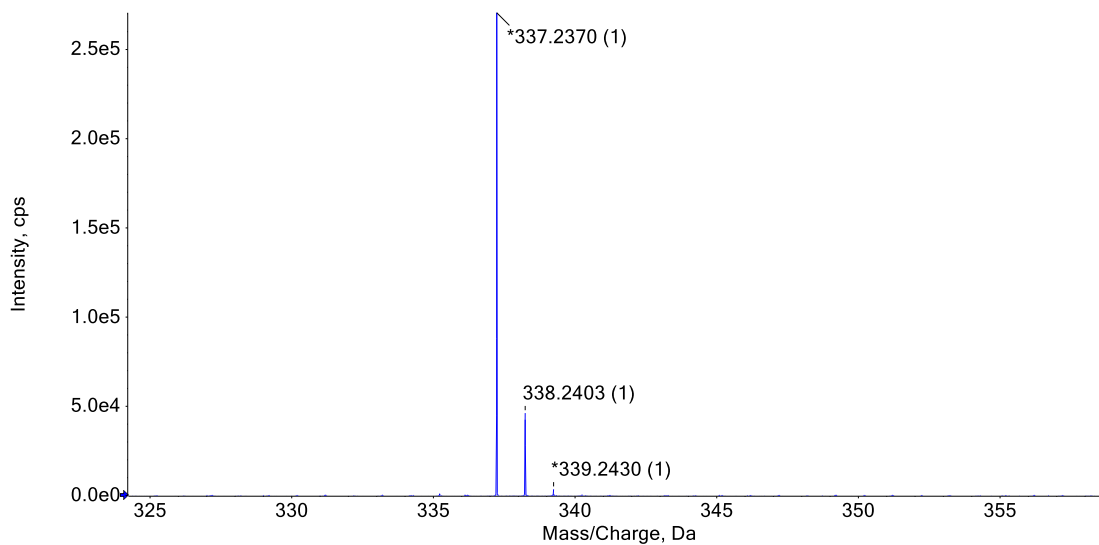

| Measured m/z | Cal m/z  | Error(mmu) | Error(ppm) | Ion Formula                                    | Ion                |
|--------------|----------|------------|------------|------------------------------------------------|--------------------|
| 337.2370     | 337.2373 | -0.3       | -0.9       | C <sub>20</sub> H <sub>33</sub> O <sub>4</sub> | [M+H] <sup>+</sup> |

**Figure S53.** The IR spectrum of **6**.

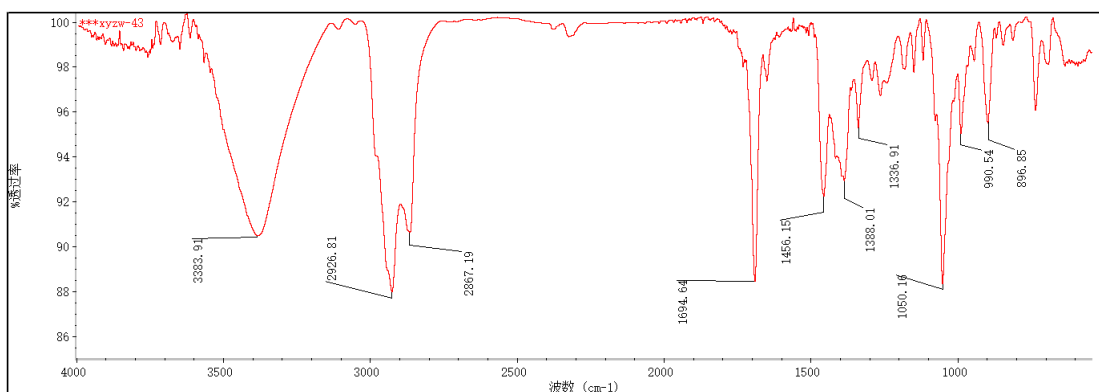



**Figure S56.** The  $^1\text{H}$ - $^1\text{H}$  COSY spectrum of **7** in  $\text{CD}_3\text{OD}$ .

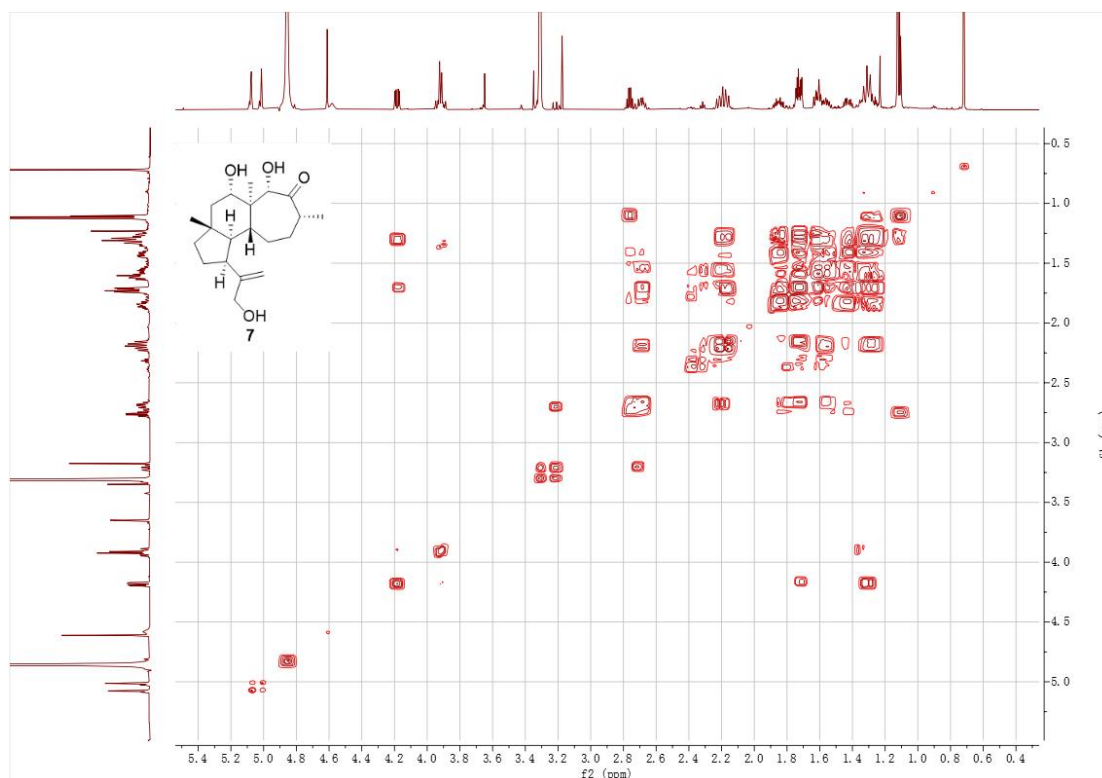

**Figure S57.** The HSQC spectrum of **7** in  $\text{CD}_3\text{OD}$ .

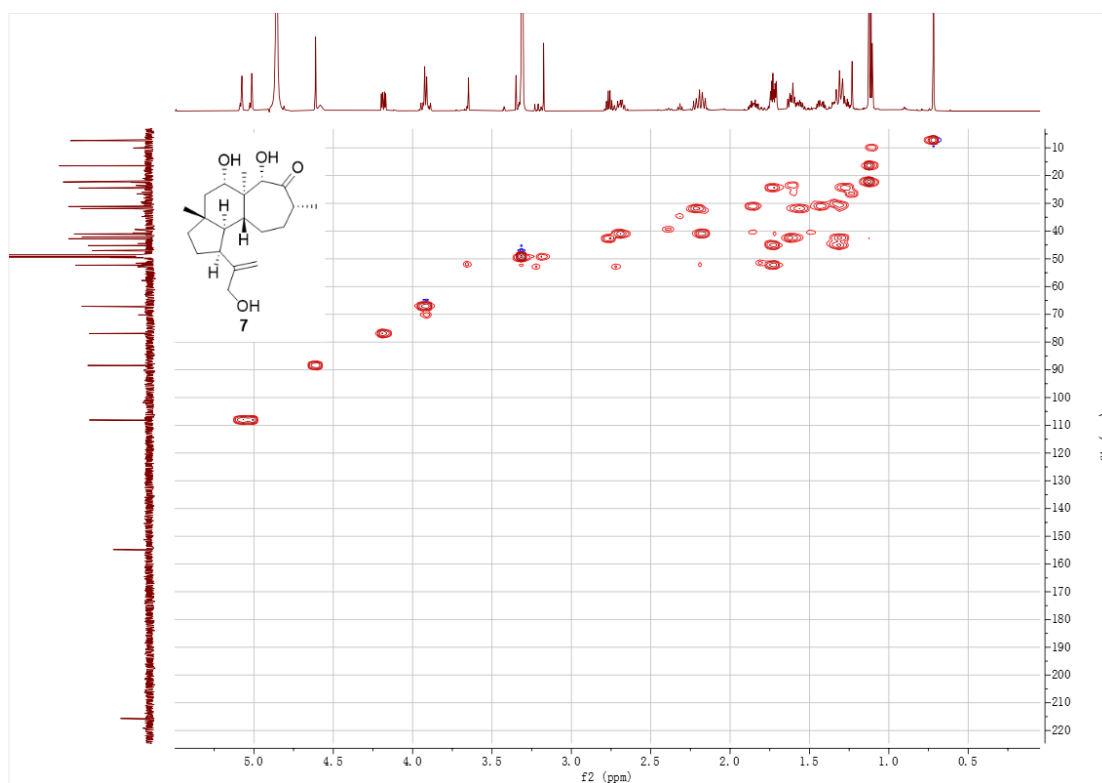

**Figure S58.** The HMBC spectrum of **7** in CD<sub>3</sub>OD.

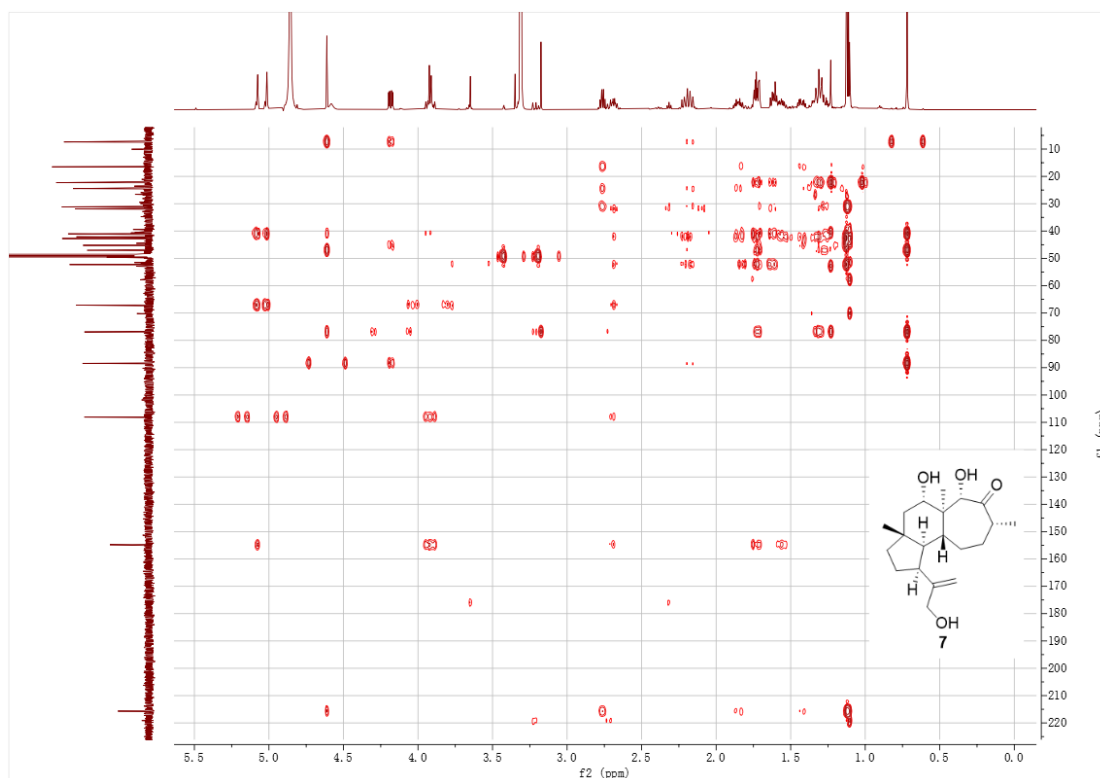

**Figure S59.** The NOESY spectrum of **7** in CD<sub>3</sub>OD.

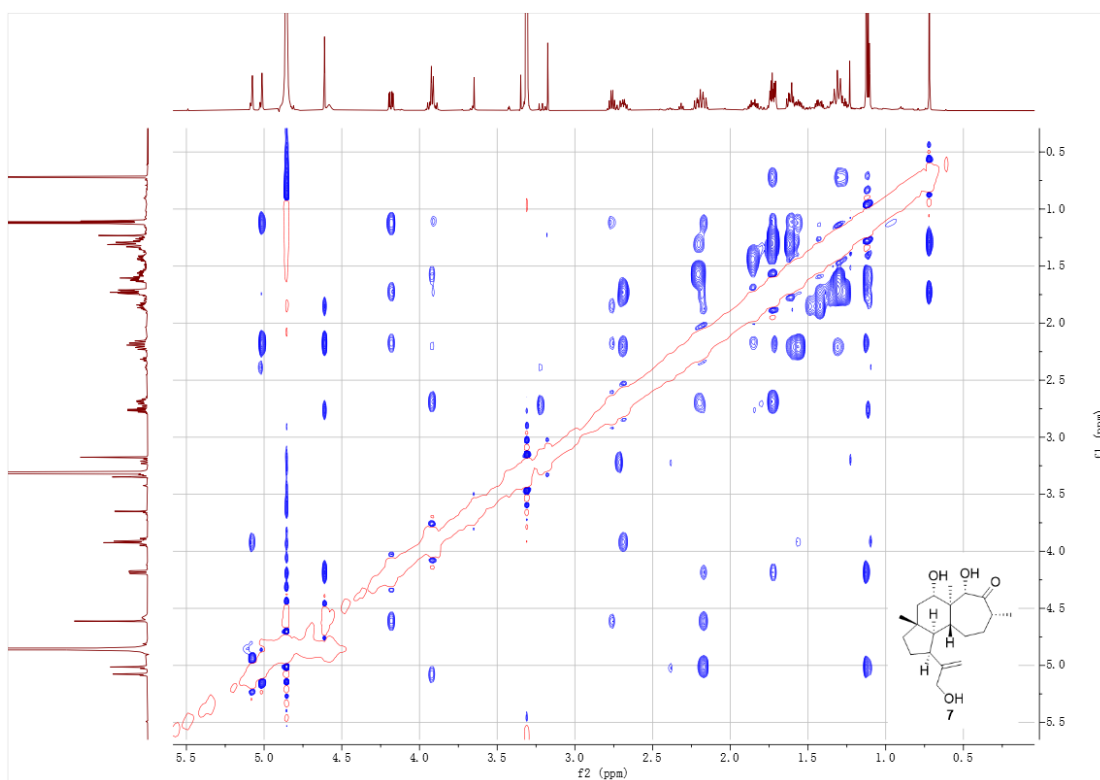

**Figure S60.** The (+)-HRESIMS spectrum of **7**.

Spectrum from XYZW-42.wiff2 (sample 1) - XYZW-42, +TOF MS (100 - 1000) from 1.394 min

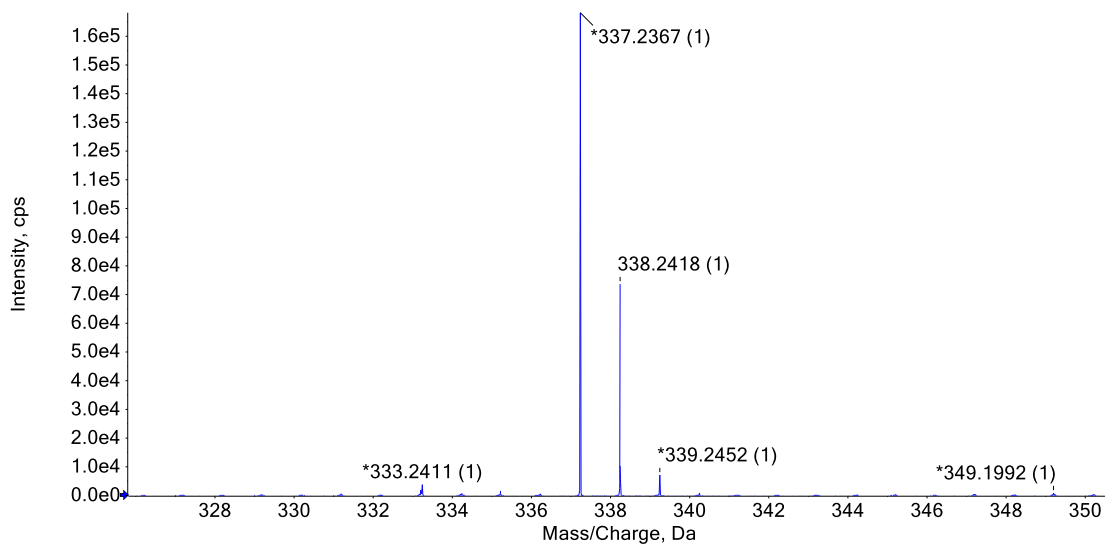

| Measured m/z | Cal m/z  | Error(mmu) | Error(ppm) | Ion Formula                                    | Ion                |
|--------------|----------|------------|------------|------------------------------------------------|--------------------|
| 337.2367     | 337.2373 | -0.6       | -1.8       | C <sub>20</sub> H <sub>33</sub> O <sub>4</sub> | [M+H] <sup>+</sup> |

**Figure S61.** The IR spectrum of **7**.

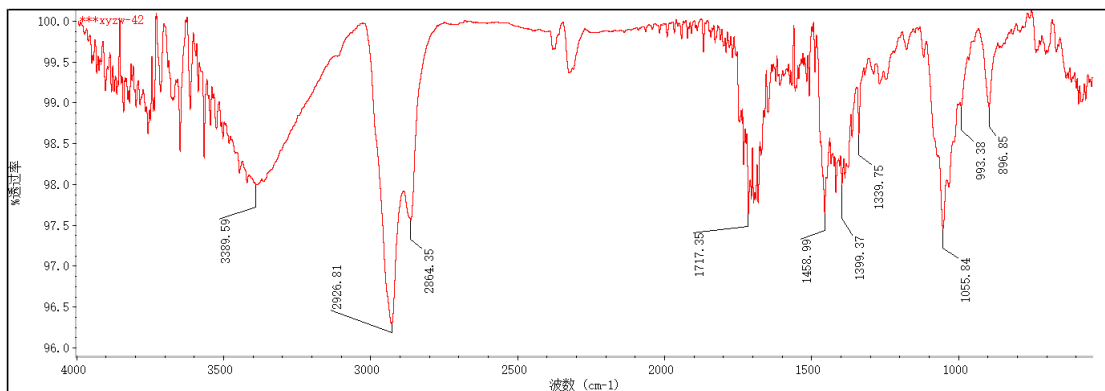



**Figure S64.** The  $^1\text{H}$ - $^1\text{H}$  COSY spectrum of **8** in  $\text{CD}_3\text{OD}$ .

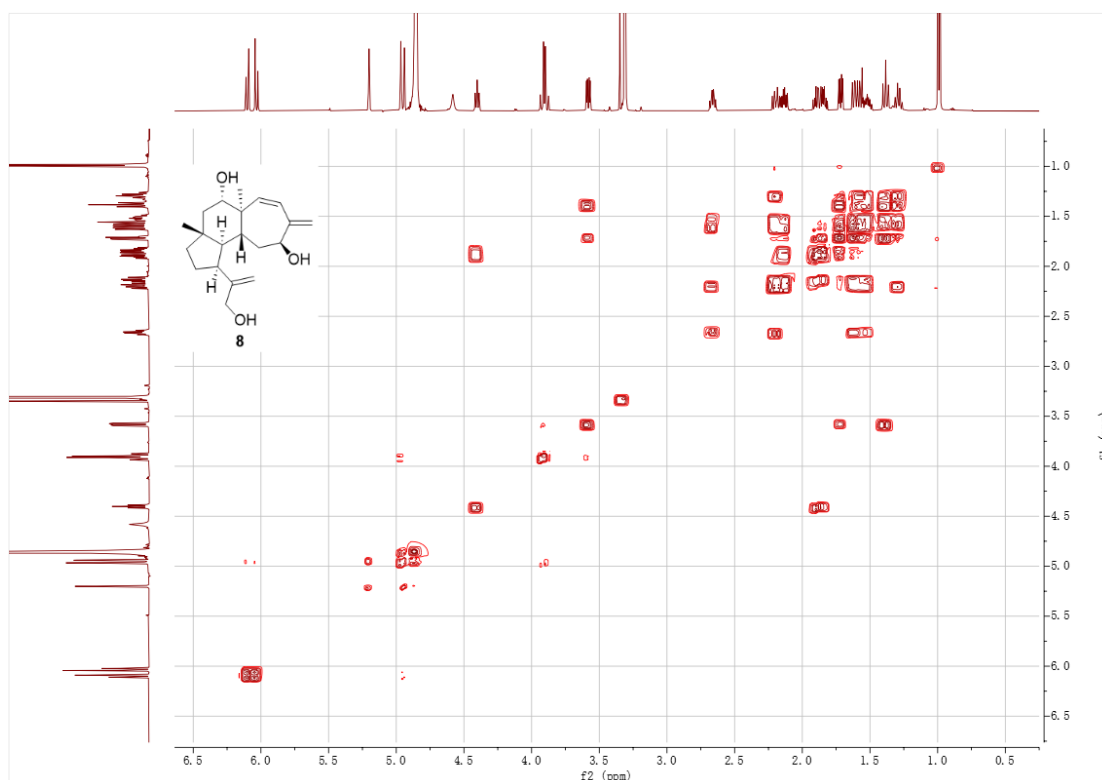

**Figure S65.** The HSQC spectrum of **8** in  $\text{CD}_3\text{OD}$ .

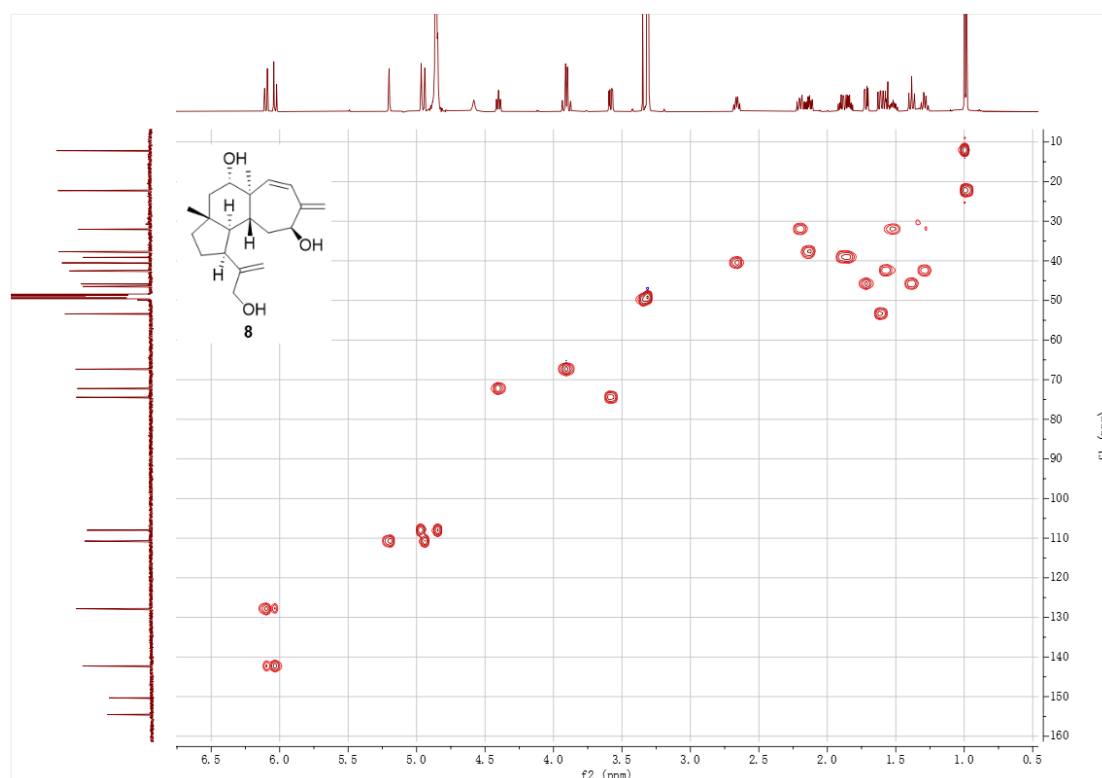

**Figure S66.** The HMBC spectrum of **8** in CD<sub>3</sub>OD.

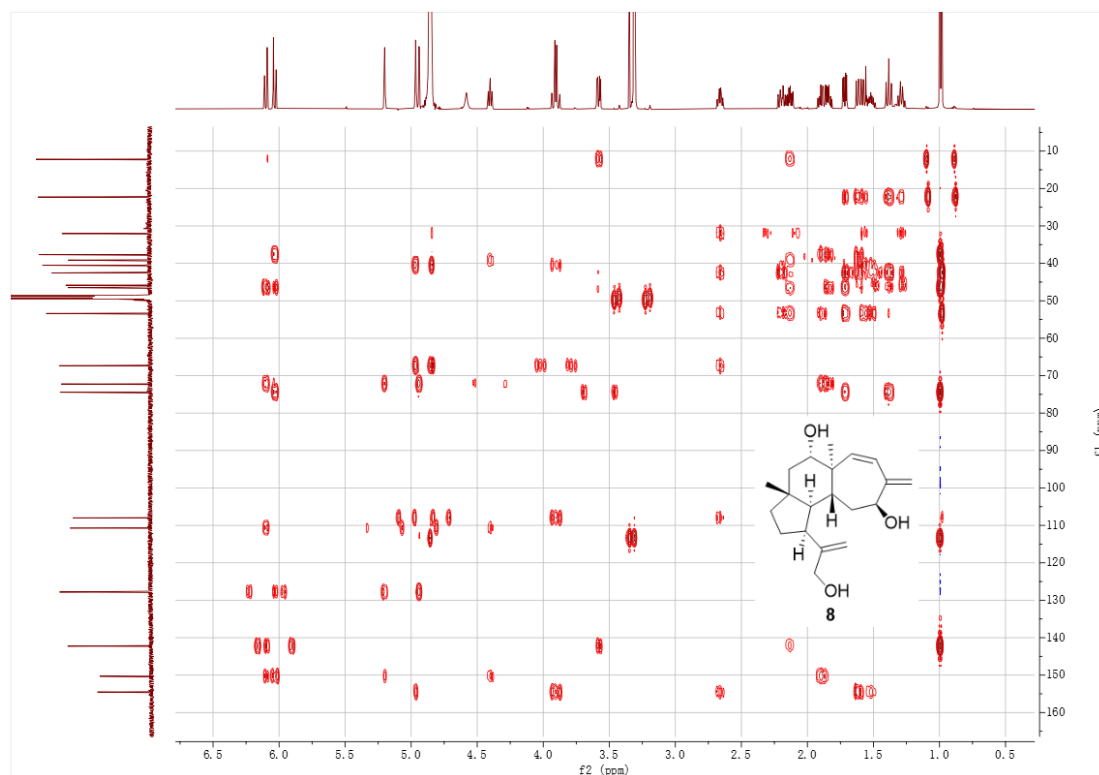

**Figure S67.** The NOESY spectrum of **8** in CD<sub>3</sub>OD.

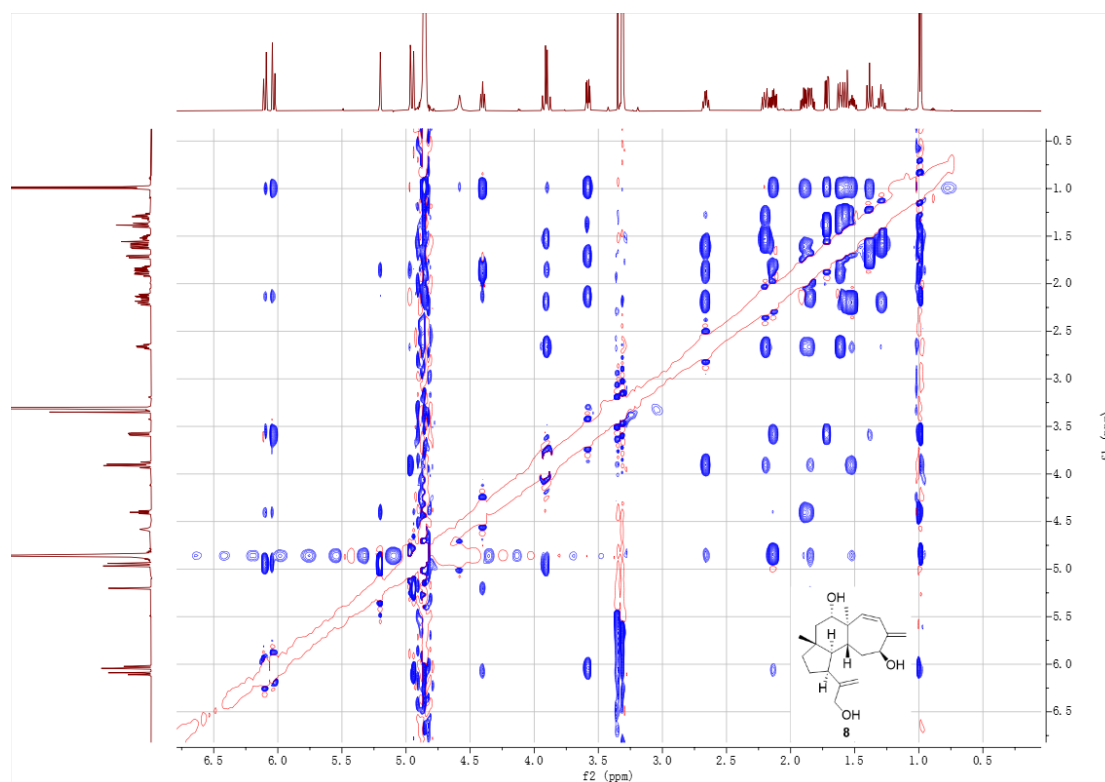

**Figure S68.** The (+)-HRESIMS spectrum of **8**.

Spectrum from XYZW-19.wiff2 (sample 1) - XYZW-19, +TOF MS (100 - 1000) from 1.370 min

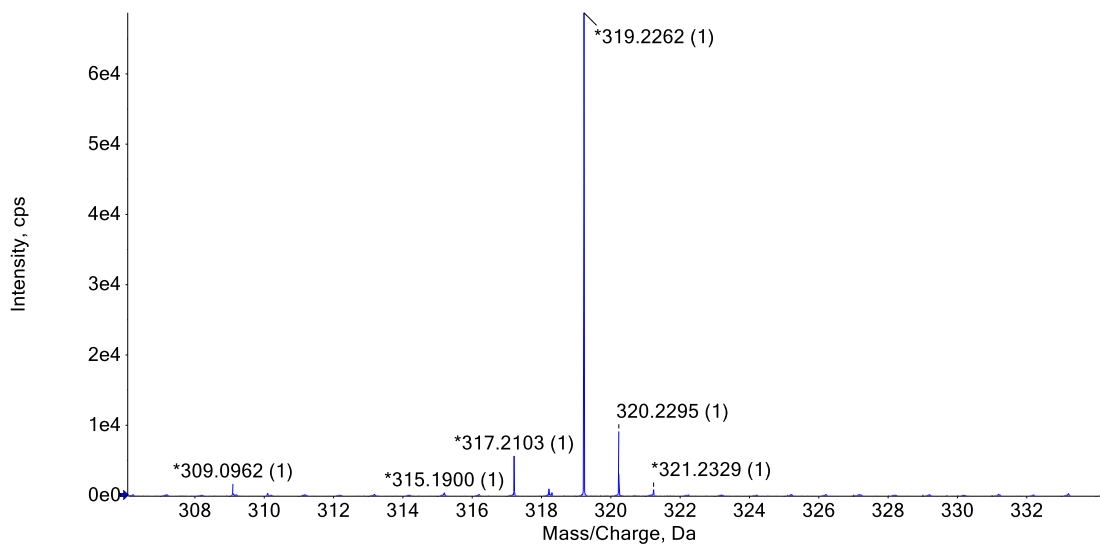

| Measured m/z | Cal m/z  | Error(mmu) | Error(ppm) | Ion Formula                                    | Ion                |
|--------------|----------|------------|------------|------------------------------------------------|--------------------|
| 319.2262     | 319.2267 | -0.5       | -1.7       | C <sub>20</sub> H <sub>31</sub> O <sub>3</sub> | [M+H] <sup>+</sup> |

**Figure S69.** The IR spectrum of **8**.

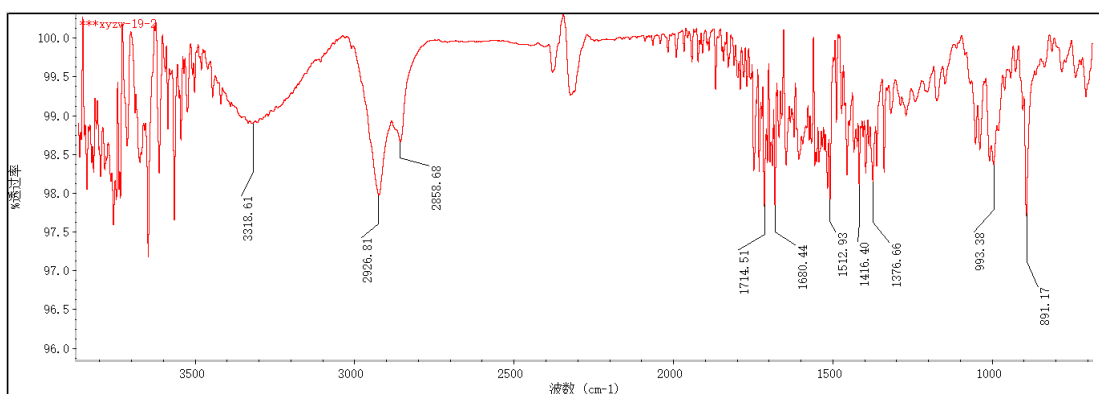

**Figure S70.** The  $^1\text{H}$  NMR spectrum of **9** in  $\text{CD}_3\text{OD}$ .

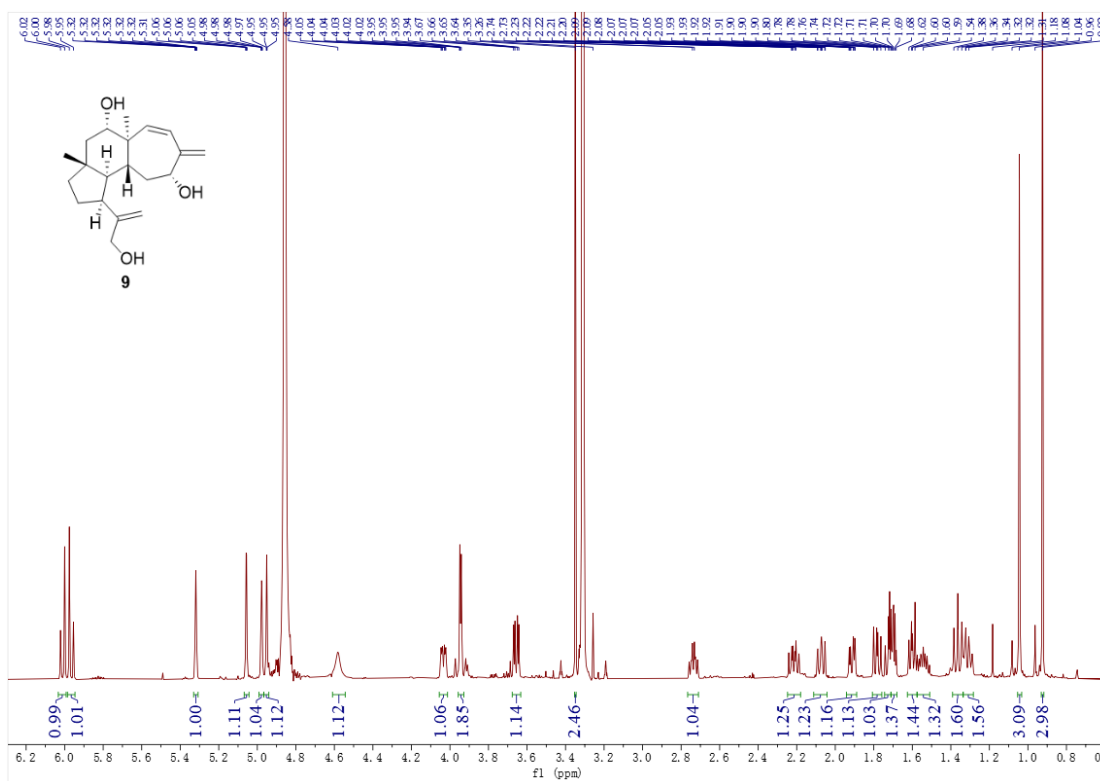

**Figure S71.** The  $^{13}\text{C}$  NMR and DEPT spectrum of **9** in  $\text{CD}_3\text{OD}$ .

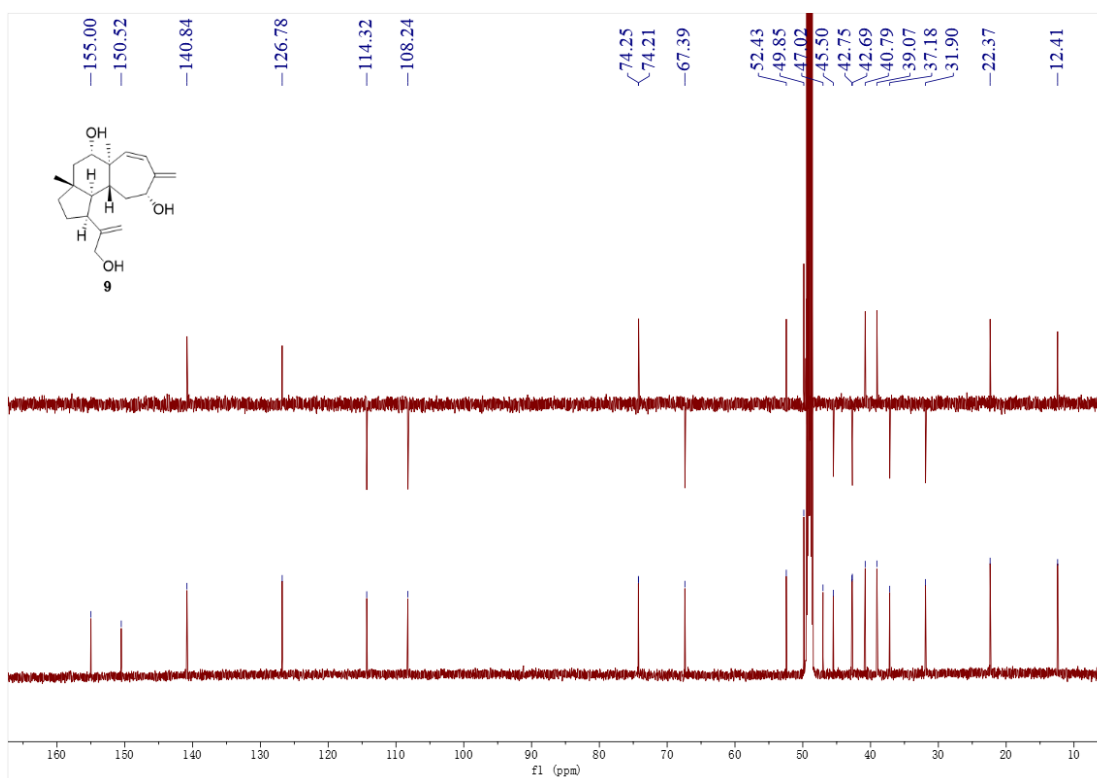

**Figure S72.** The  $^1\text{H}$ - $^1\text{H}$  COSY spectrum of **9** in  $\text{CD}_3\text{OD}$ .

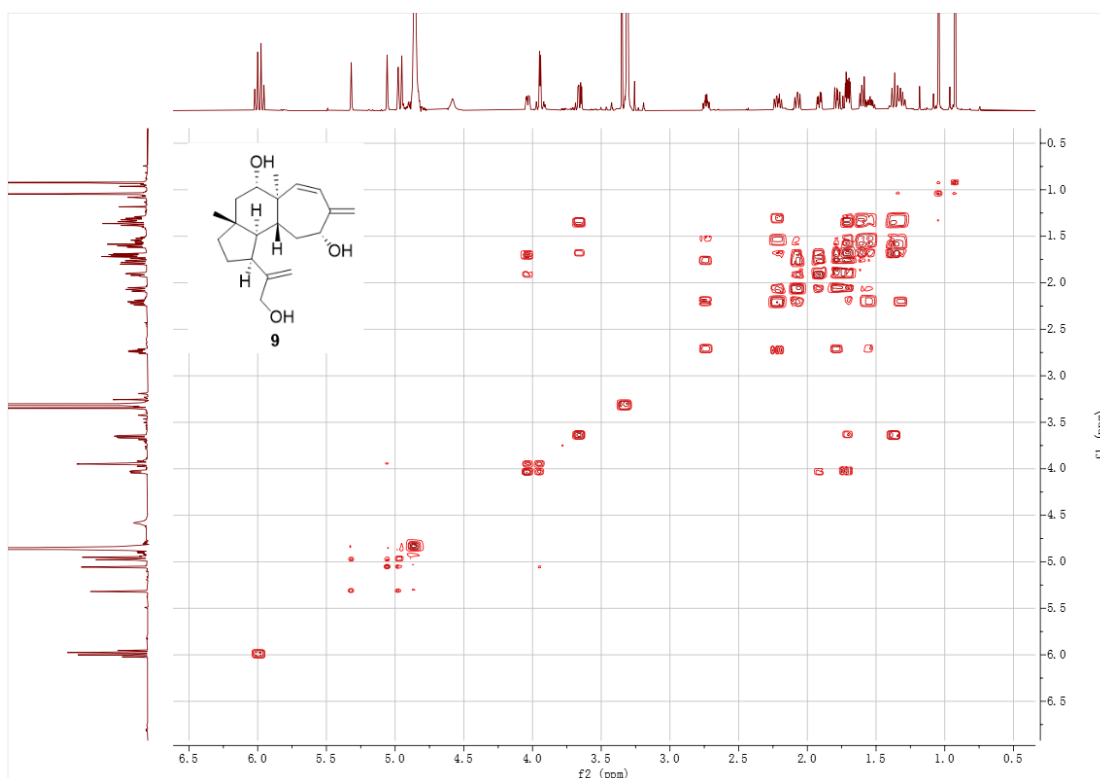

**Figure S73.** The HSQC spectrum of **9** in  $\text{CD}_3\text{OD}$ .

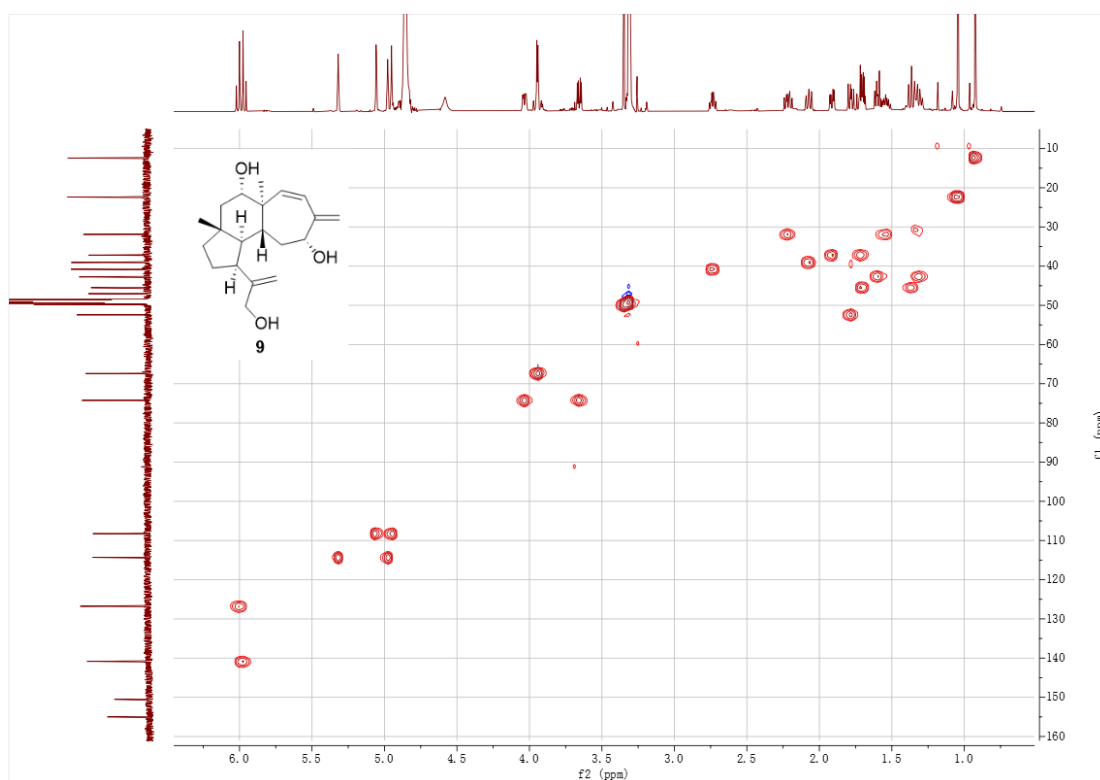

**Figure S74.** The HMBC spectrum of **9** in CD<sub>3</sub>OD.

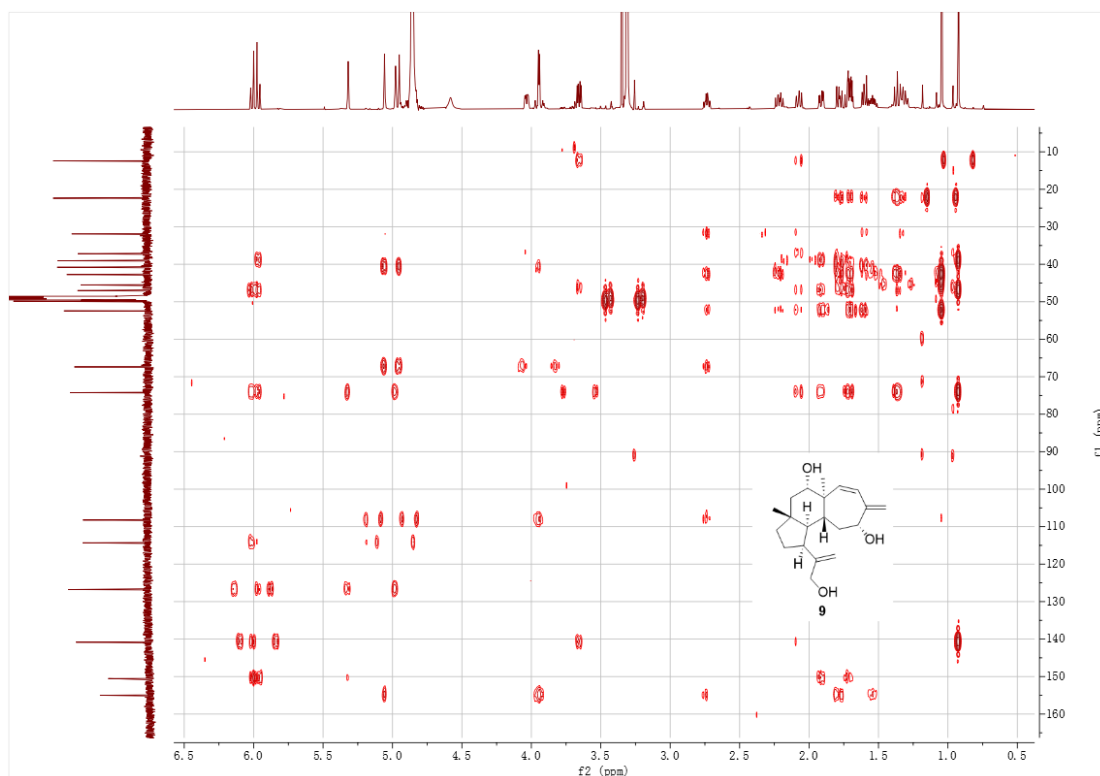

**Figure S75.** The NOESY spectrum of **9** in CD<sub>3</sub>OD.

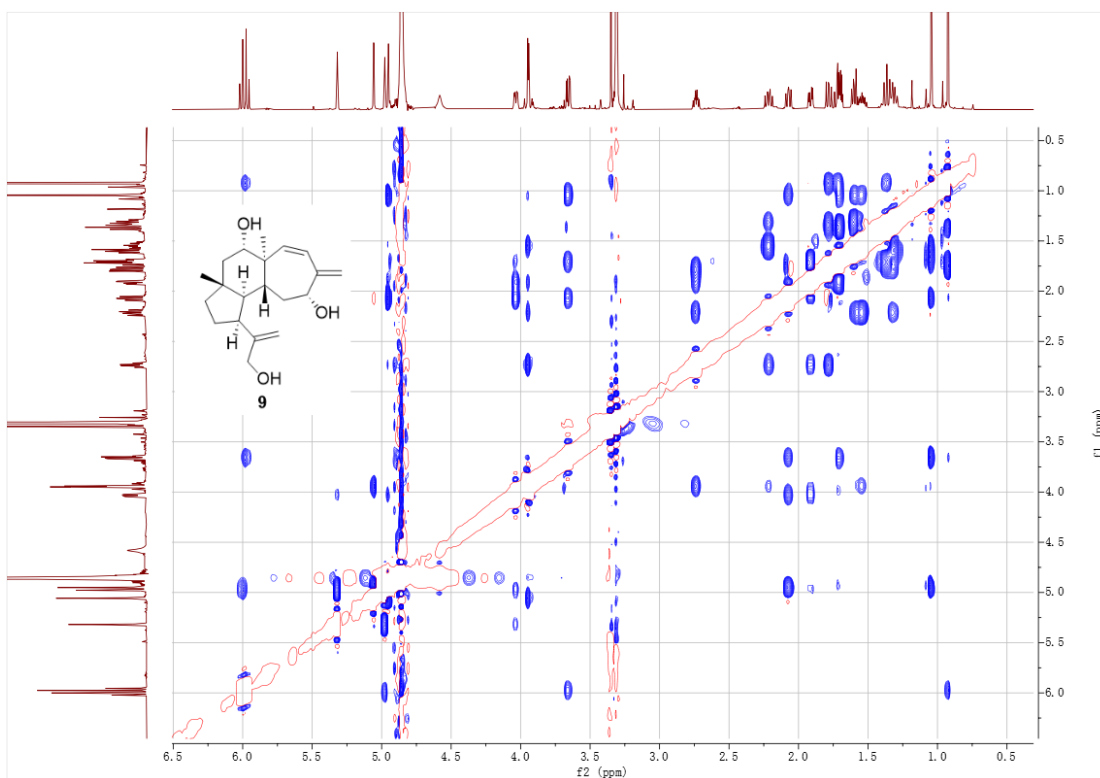

**Figure S76.** The (+)-HRESIMS spectrum of **9**.

Spectrum from XYZW-18.wiff2 (sample 1) - XYZW-18, +TOF MS (100 - 1000) from 1.358 min

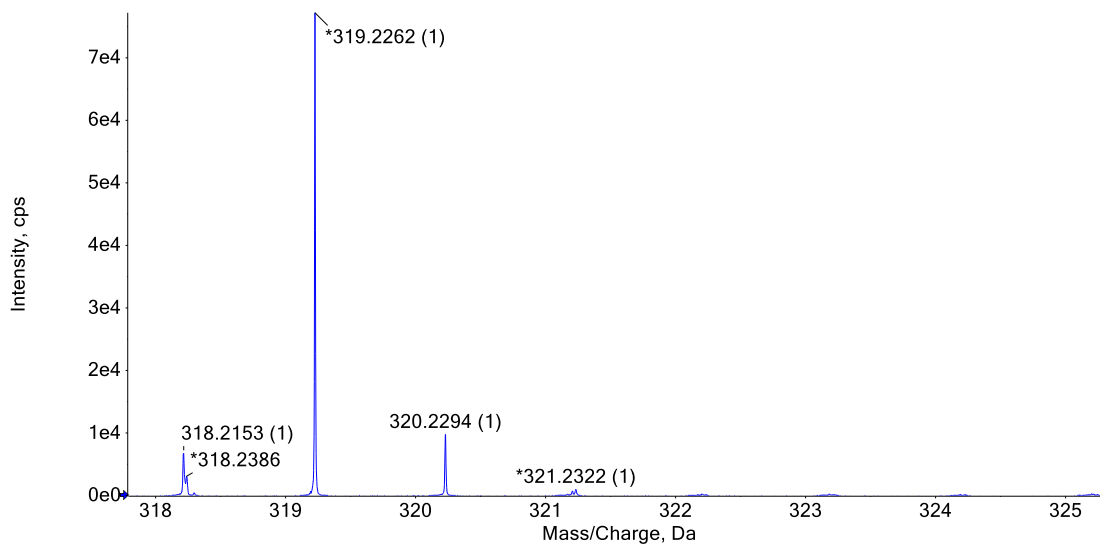

| Measured m/z | Cal m/z  | Error(mmu) | Error(ppm) | Ion Formula                                    | Ion                |
|--------------|----------|------------|------------|------------------------------------------------|--------------------|
| 319.2262     | 319.2267 | -0.5       | -1.6       | C <sub>20</sub> H <sub>31</sub> O <sub>3</sub> | [M+H] <sup>+</sup> |

**Figure S77.** The IR spectrum of **9**.

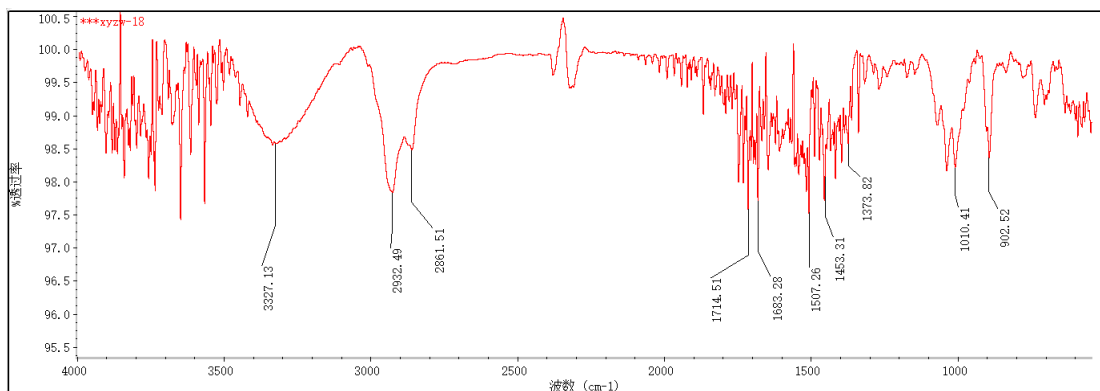

**Figure S78.** The  $^1\text{H}$  NMR spectrum of **10** in  $\text{CD}_3\text{OD}$ .

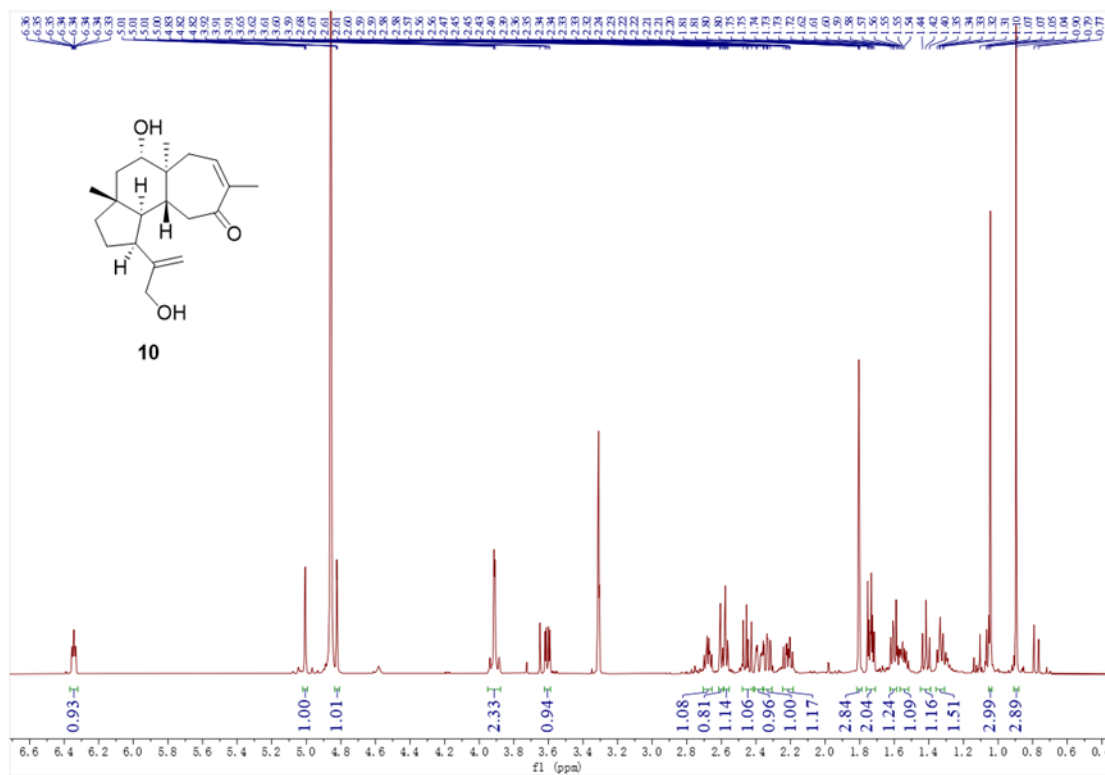

**Figure S79.** The  $^{13}\text{C}$  NMR and DEPT spectrum of **10** in  $\text{CD}_3\text{OD}$ .

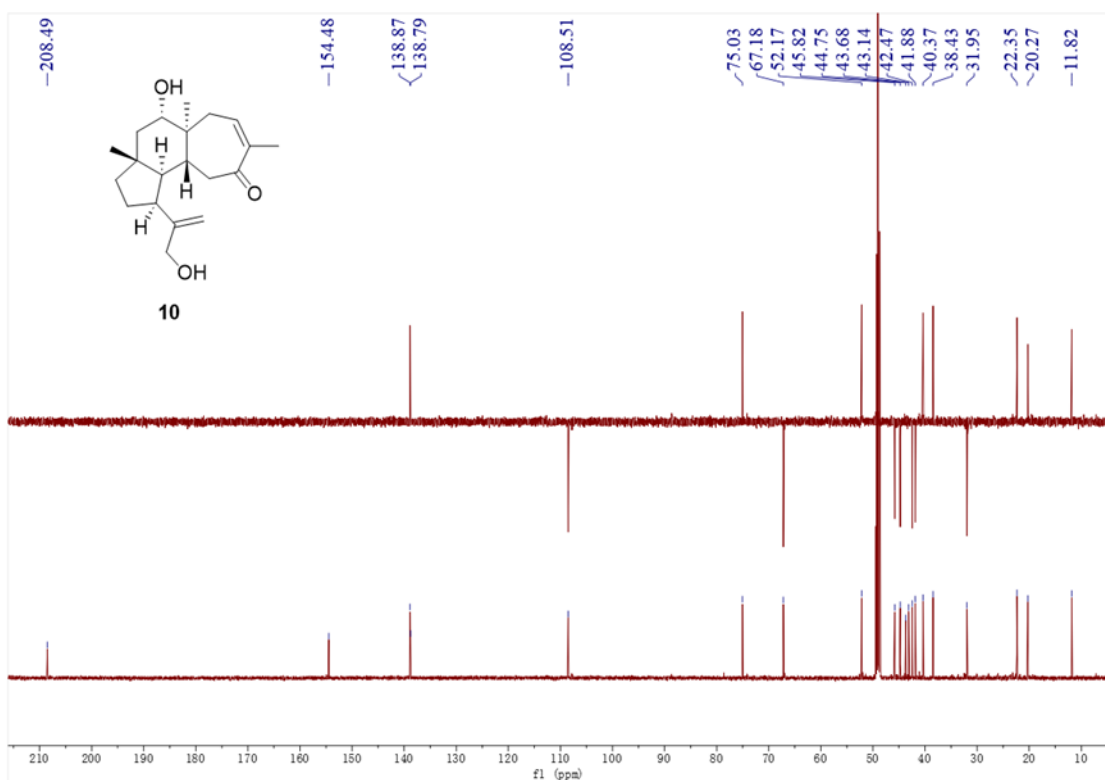

**Figure S80.** The  $^1\text{H}$ - $^1\text{H}$  COSY spectrum of **10** in  $\text{CD}_3\text{OD}$ .

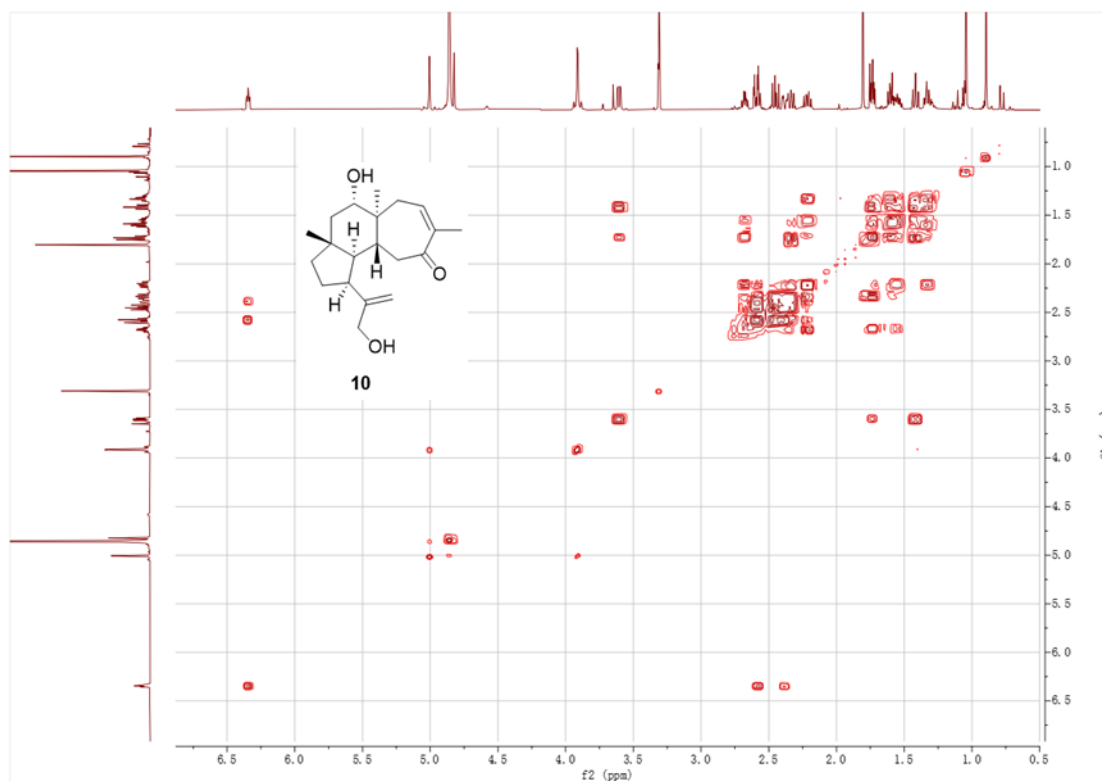

**Figure S81.** The HSQC spectrum of **10** in  $\text{CD}_3\text{OD}$ .

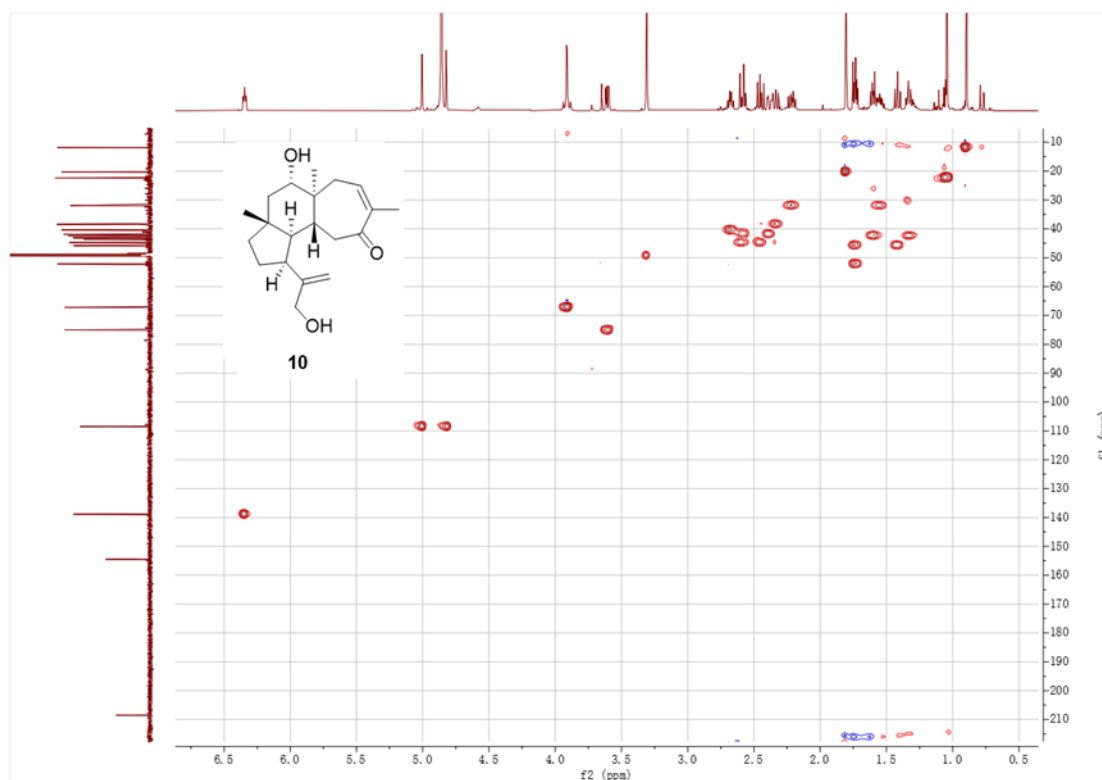

**Figure S82.** The HMBC spectrum of **10** in CD<sub>3</sub>OD.

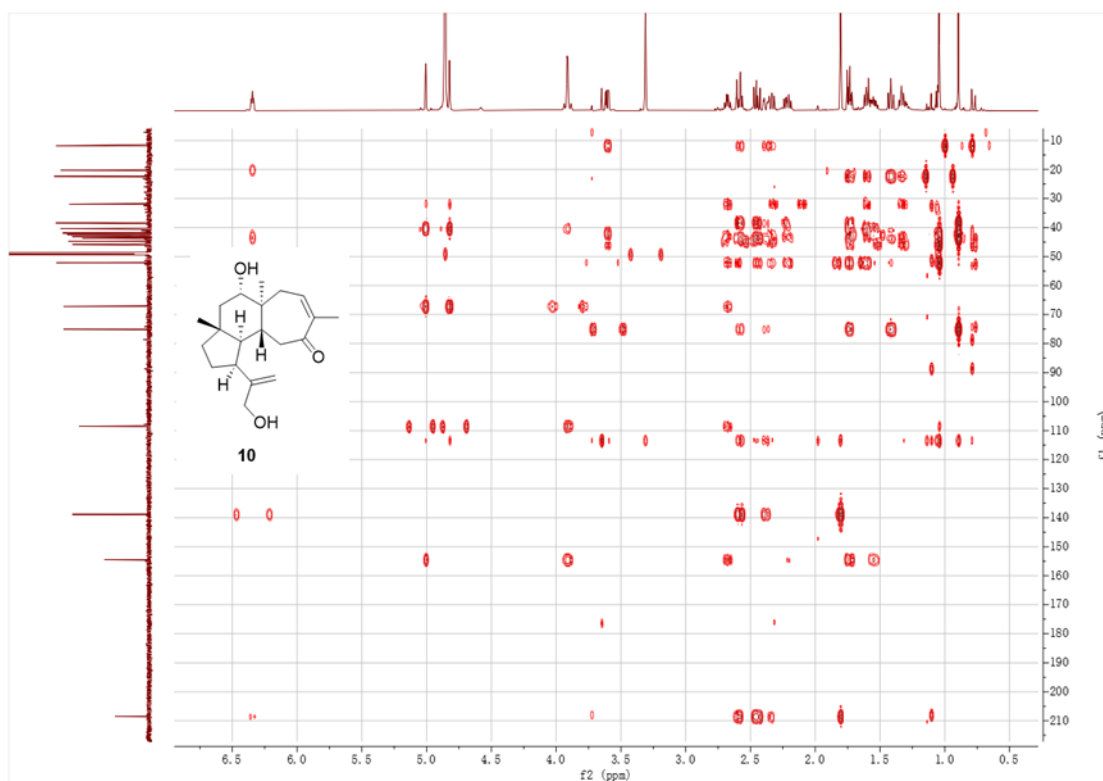

**Figure S83.** The NOESY spectrum of **10** in CD<sub>3</sub>OD.

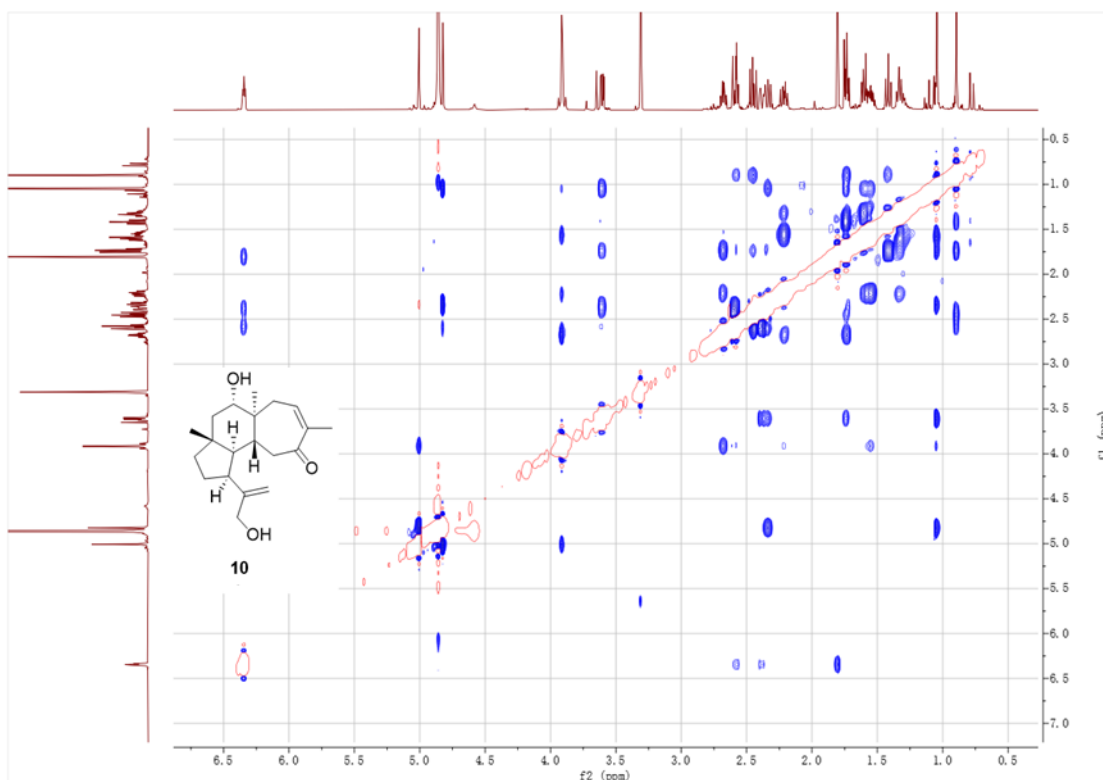

**Figure S84.** The (+)-HRESIMS spectrum of **10**.

Spectrum from XYZW-30.wiff2 (sample 1) - XYZW-30, +TOF MS (100 - 1000) from 1.358 min

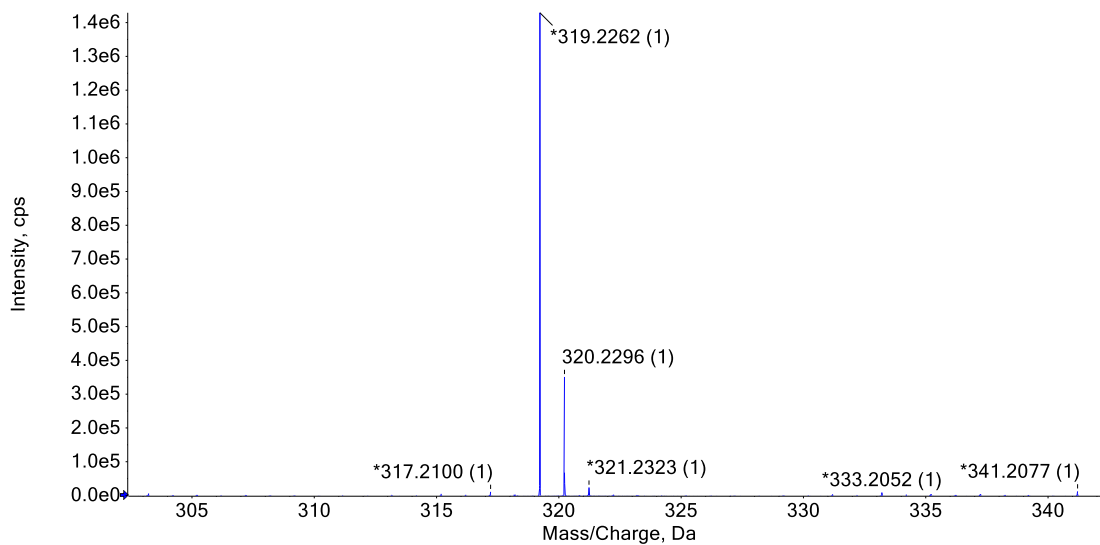

| Measured m/z | Cal m/z  | Error(mmu) | Error(ppm) | Ion Formula                                    | Ion                |
|--------------|----------|------------|------------|------------------------------------------------|--------------------|
| 319.2262     | 319.2267 | -0.5       | -1.8       | C <sub>20</sub> H <sub>31</sub> O <sub>3</sub> | [M+H] <sup>+</sup> |

**Figure S85.** The IR spectrum of **10**.

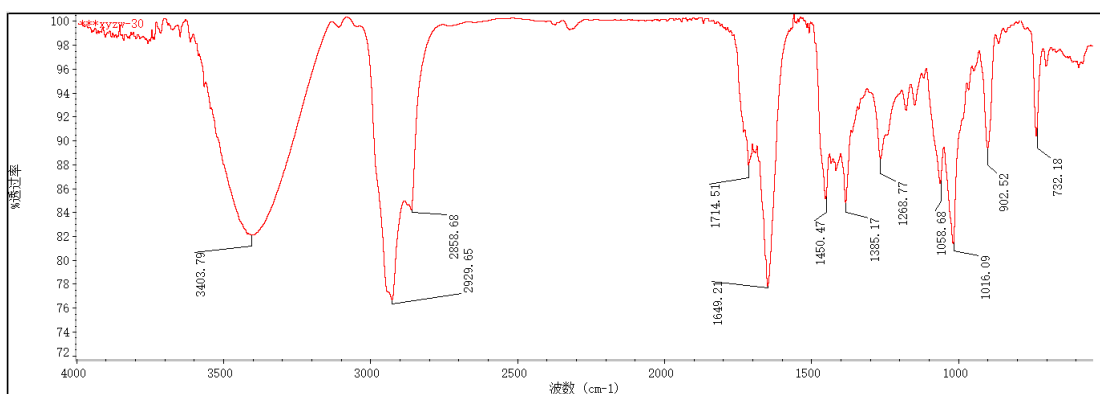

Figure S86. DP4+ detailed results of 7.

| Functional<br>mPW1PW91 |      | Solvent?<br>PCM |            | Basis Set<br>6-31+G(d,p) |          |
|------------------------|------|-----------------|------------|--------------------------|----------|
|                        |      | DP4+            | 0.00%      | 100.00%                  | -        |
| Nuclei                 | sp2? | Experiments     | Isomer 1   | Isomer 2                 | Isomer 3 |
| C                      |      | 45.2            | 45.8       | 45.5                     |          |
| C                      |      | 42.1            | 45.0       | 44.9                     |          |
| C                      |      | 52.3            | 55.7       | 54.3                     |          |
| C                      |      | 41              | 38.7       | 37.5                     |          |
| C                      |      | 47              | 50.4       | 49.8                     |          |
| C                      |      | 76.9            | 76.1       | 79.4                     |          |
| C                      |      | 24.5            | 30.5       | 27.4                     |          |
| C                      |      | 31.2            | 29.6       | 34.4                     |          |
| C                      |      | 42.7            | 50.9       | 45.8                     |          |
| C                      | x    | 215.7           | 218.0      | 218.7                    |          |
| C                      |      | 88.4            | 88.4       | 91.3                     |          |
| C                      |      | 42.6            | 43.88      | 44.08                    |          |
| C                      |      | 31.9            | 34.08      | 36.25                    |          |
| C                      |      | 41.1            | 41.39      | 43.39                    |          |
| C                      |      | 7.4             | 9.41       | 7.57                     |          |
| C                      |      | 22.3            | 24.24      | 23.80                    |          |
| C                      | x    | 154.8           | 158.78     | 159.45                   |          |
| C                      |      | 67.1            | 71.85      | 69.14                    |          |
| C                      | x    | 108.1           | 109.08     | 103.23                   |          |
| C                      |      | 16.5            | 18.85      | 18.18                    |          |
| H                      |      | 1.73            | 1.71       | 1.65                     |          |
| H                      |      | 1.33            | 1.25       | 1.11                     |          |
| H                      |      | 1.73            | 1.52       | 1.76                     |          |
| H                      |      | 2.17            | 2.37       | 2.18                     |          |
| H                      |      | 4.18            | 4.33802462 | 4.23284495               |          |
| H                      |      | 1.26            | 2.01930891 | 1.04988099               |          |
| H                      |      | 1.73            | 1.25777024 | 1.15341173               |          |
| H                      |      | 1.43            | 1.59865451 | 1.05175728               |          |
| H                      |      | 1.85            | 1.71093915 | 1.68011971               |          |
| H                      |      | 2.76            | 2.75502117 | 3.02265443               |          |
| H                      |      | 4.61            | 4.59197747 | 4.42877673               |          |
| H                      |      | 1.63            | 1.57126245 | 1.58519638               |          |
| H                      |      | 1.31            | 1.25202199 | 1.28539516               |          |
| H                      |      | 2.21            | 2.21900762 | 2.140571                 |          |
| H                      |      | 1.56            | 1.43111004 | 1.48869761               |          |
| H                      |      | 2.69            | 3.26571894 | 2.31422671               |          |
| H                      |      | 0.72            | 0.69       | 0.69834428               |          |
| H                      |      | 1.12            | 1.06       | 1.10898156               |          |
| H                      |      | 3.92            | 3.97586356 | 4.16119126               |          |
| H                      |      | 3.92            | 4.09252068 | 3.92943446               |          |
| H                      |      | 5.08            | 5.24528967 | 5.49520245               |          |
| H                      |      | 5.01            | 5.36363782 | 5.31704247               |          |
| H                      |      | 1.12            | 1.23       | 1.00917787               |          |

**Figure S87. HPLC spectra and purities of compounds 1–15.**

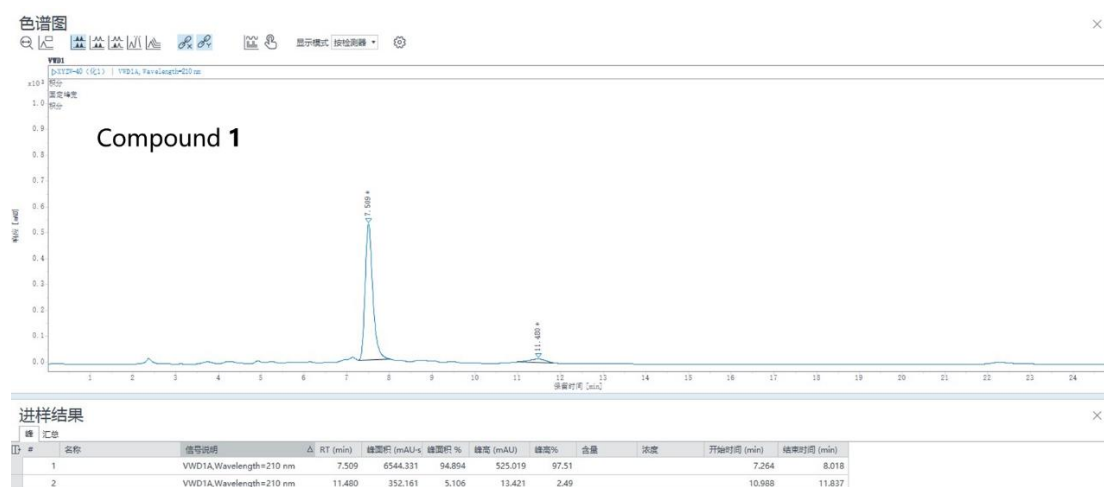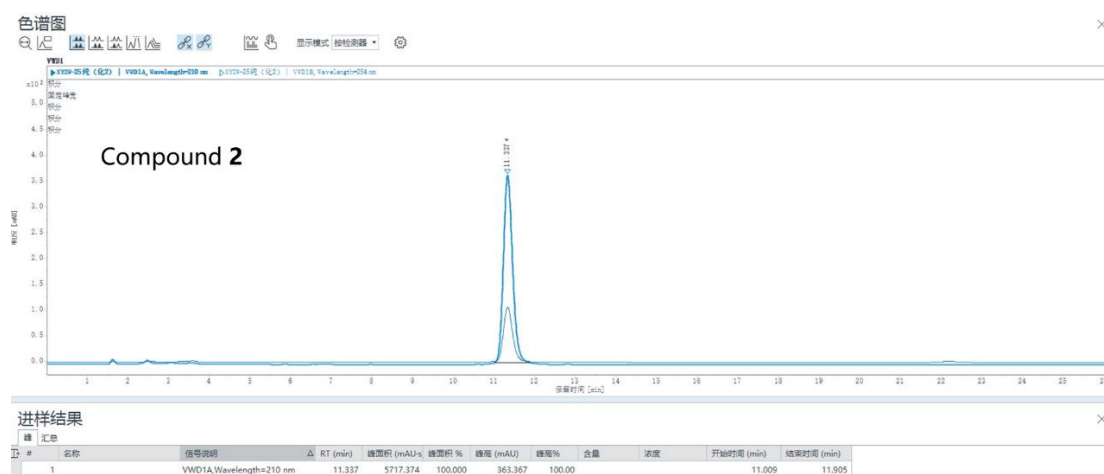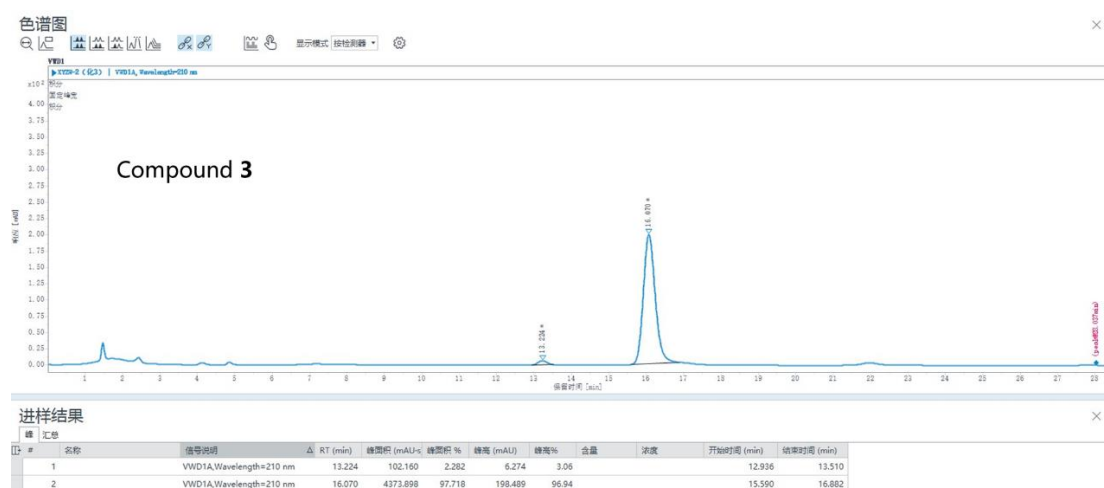

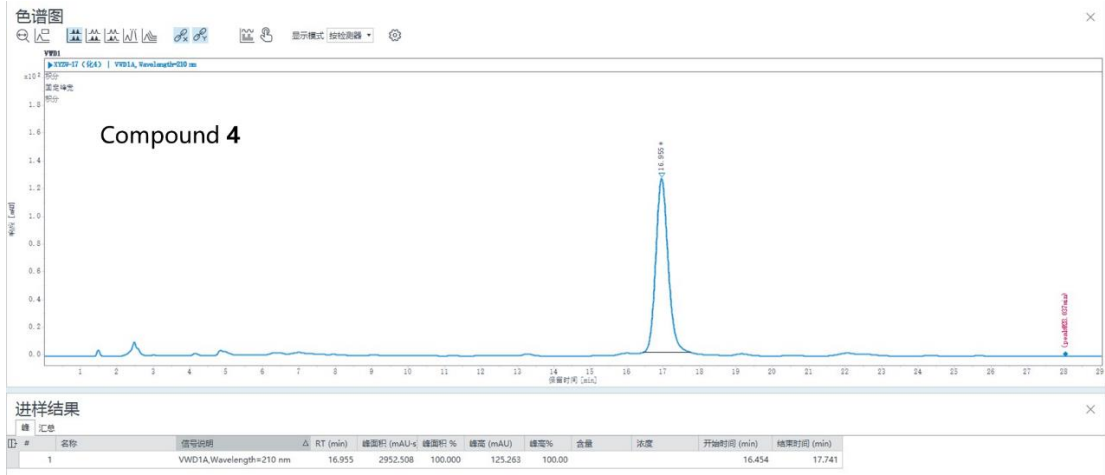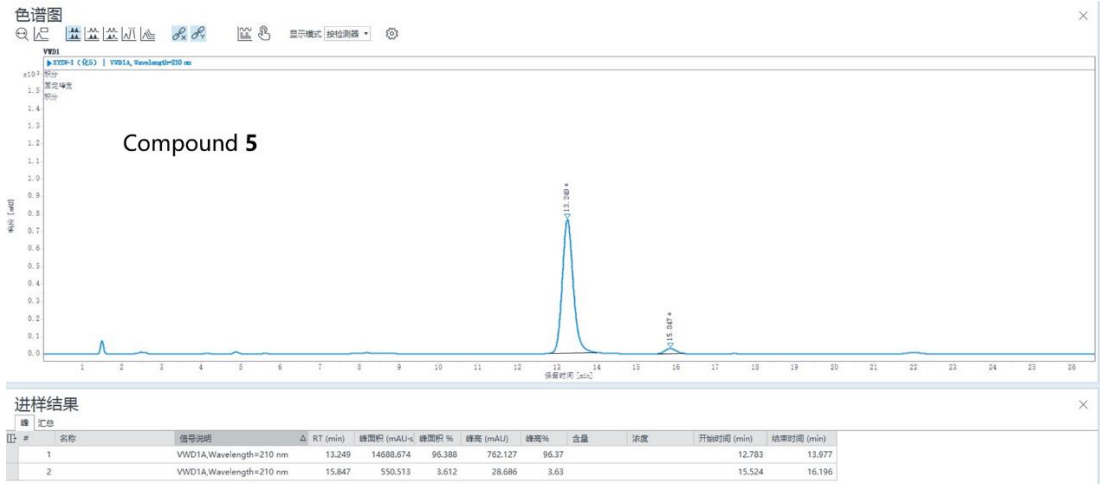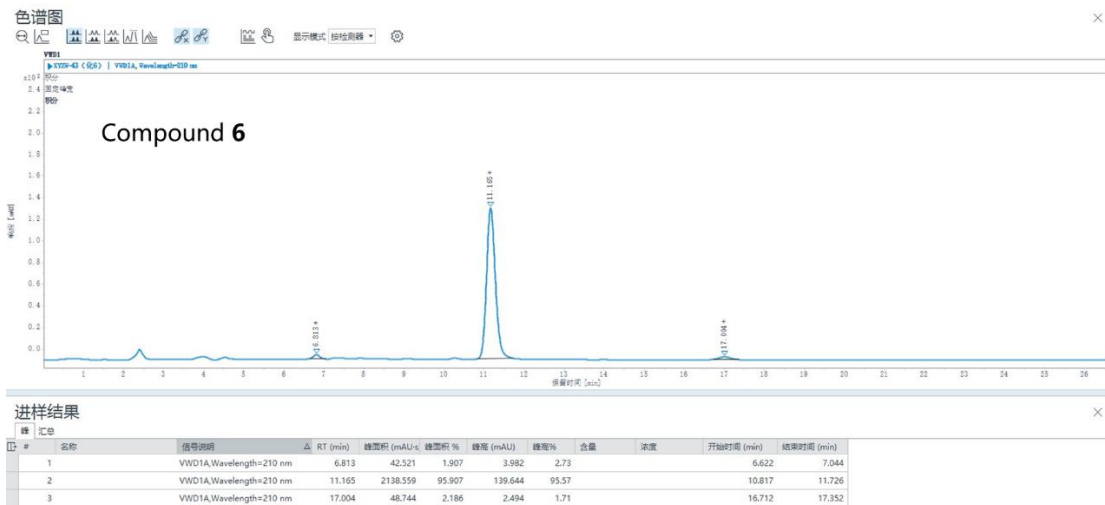

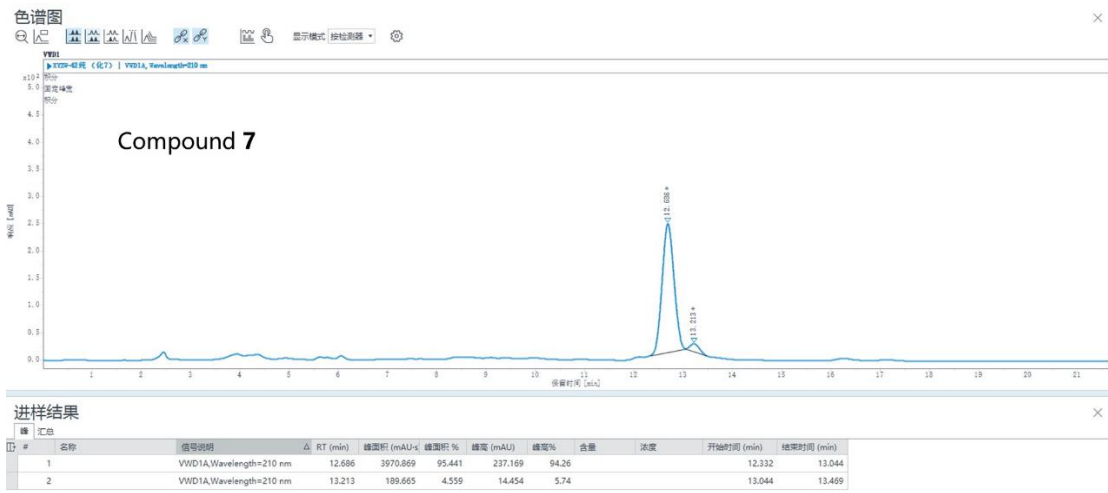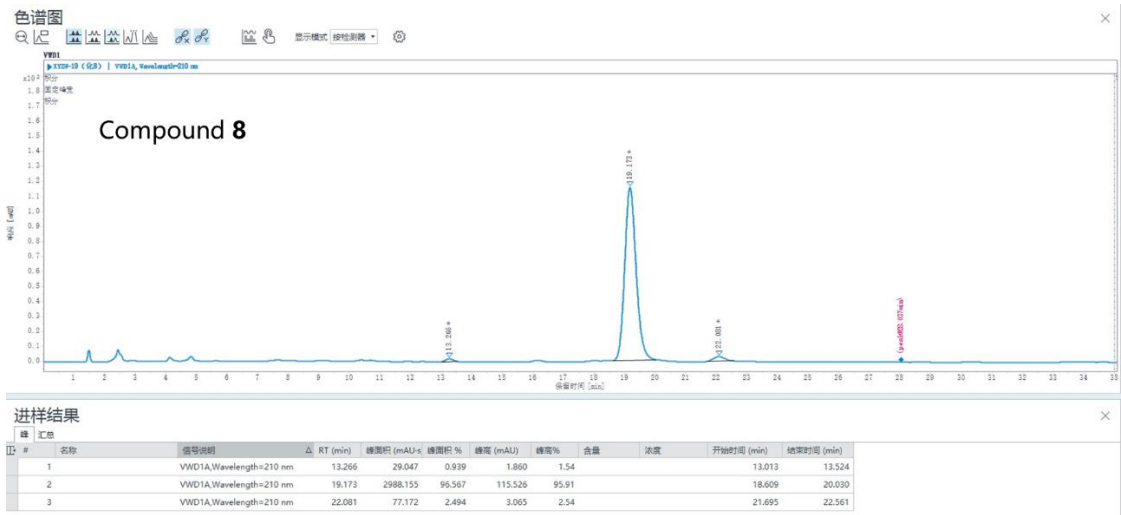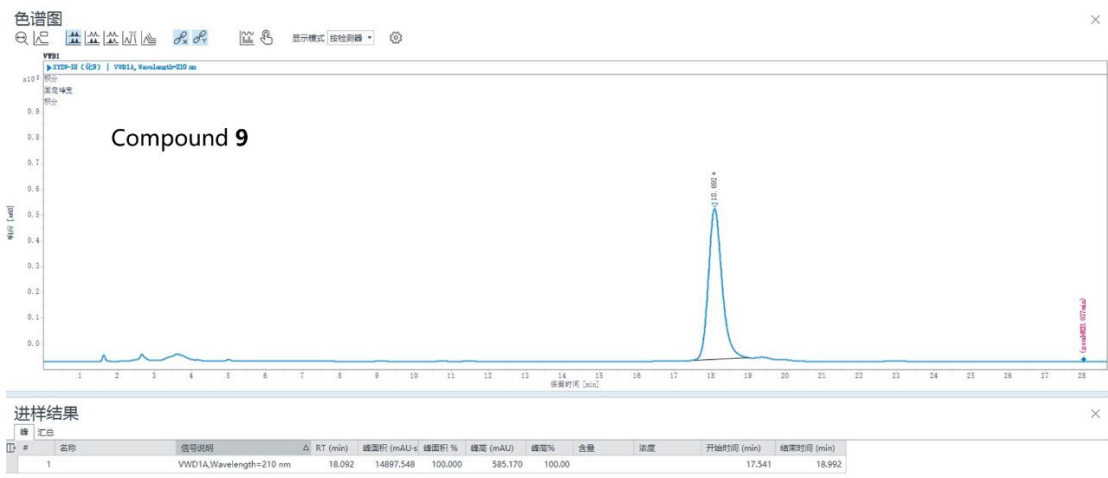



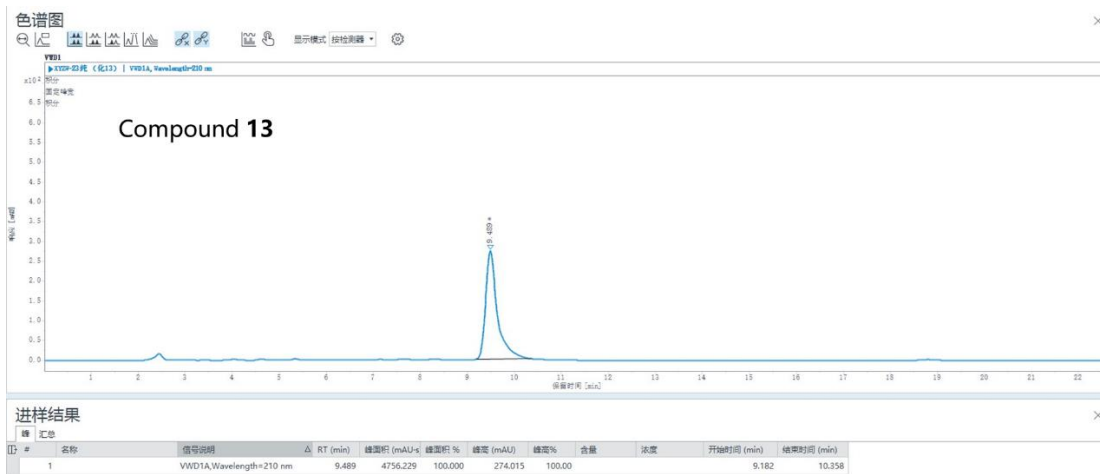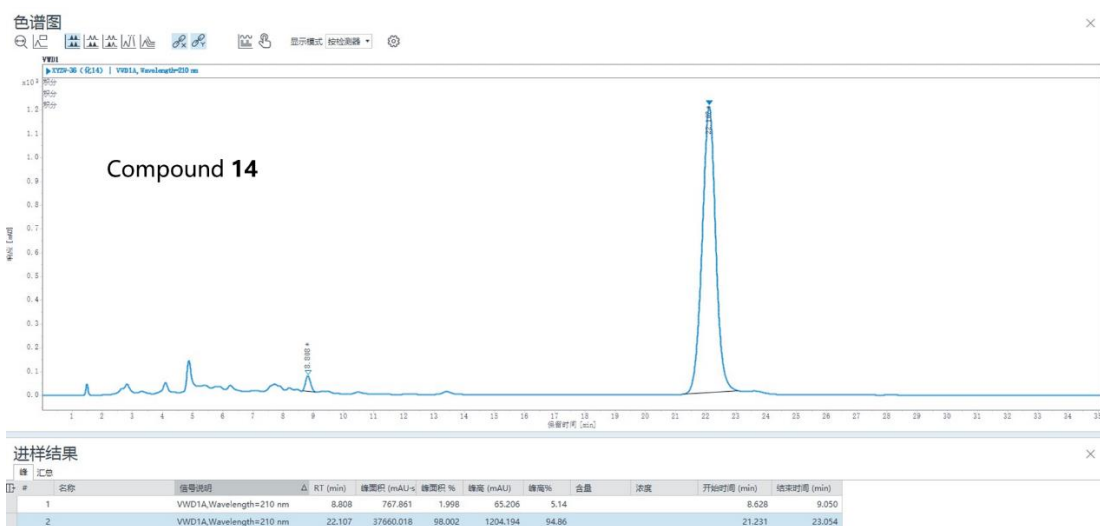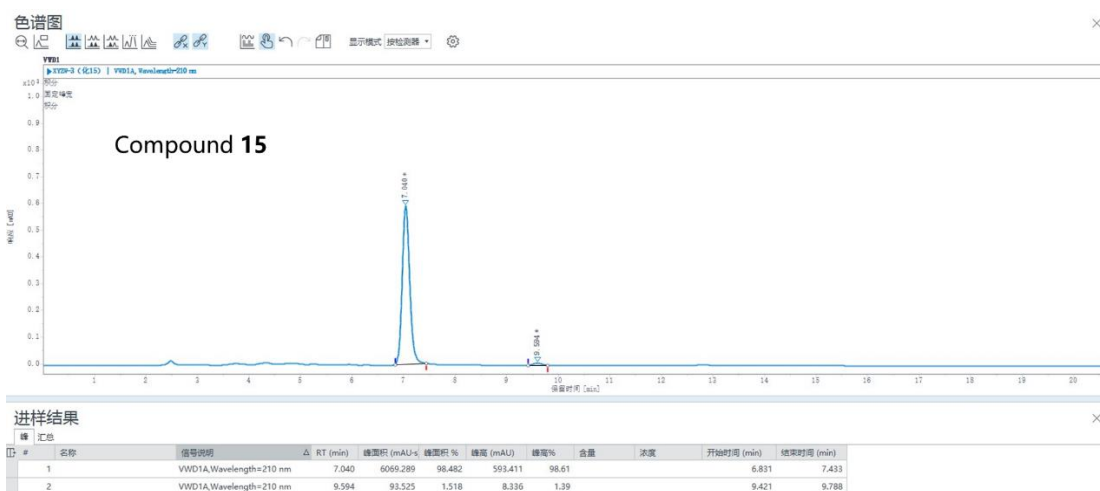

**Table S1.** Re-optimized conformers, energies and proportions for **1**.

| Number | Conformer                                                                           | Energy (hartree) | Energy (Kcal/mol) | Proportion (%) |
|--------|-------------------------------------------------------------------------------------|------------------|-------------------|----------------|
| 1      | 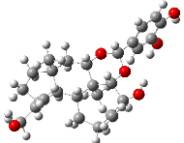   | -1501.448498     | -942173.0326      | 35.29          |
| 2      |    | -1501.448104     | -942172.7854      | 23.24          |
| 3      |    | -1501.448087     | -942172.7747      | 22.83          |
| 4      |    | -1501.447525     | -942172.422       | 12.58          |
| 5      |   | -1501.44649      | -942171.7726      | 4.20           |
| 6      |  | -1501.445022     | -942170.8514      | 0.89           |
| 7      |  | -1501.444654     | -942170.6205      | 0.60           |
| 8      |  | -1501.4442       | -942170.3356      | 0.37           |

**Table S2.** Re-optimized conformers, energies and proportions for **2**.

| Number | Conformer                                                                           | Energy (hartree) | Energy (Kcal/mol) | Proportion (%) |
|--------|-------------------------------------------------------------------------------------|------------------|-------------------|----------------|
| 1      |    | -1081.927937     | -678919.9409      | 45.11          |
| 2      |    | -1081.927326     | -678919.5574      | 23.61          |
| 3      |    | -1081.927025     | -678919.3686      | 17.16          |
| 4      |    | -1081.926398     | -678918.9751      | 8.83           |
| 5      |  | -1081.925745     | -678918.5654      | 4.42           |
| 6      |  | -1081.924041     | -678917.4961      | 0.73           |
| 7      |  | -1081.922596     | -678916.5893      | 0.16           |

**Table S3.** Re-optimized conformers, energies and proportions for **4**.

| Number | Conformer                                                                           | Energy (hartree) | Energy (Kcal/mol) | Proportion (%) |
|--------|-------------------------------------------------------------------------------------|------------------|-------------------|----------------|
| 1      | 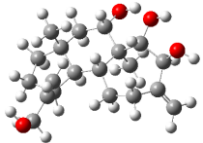   | -1081.895141     | -678899.3611      | 86.57          |
| 2      |    | -1081.892482     | -678897.6925      | 5.17           |
| 3      |    | -1081.89228      | -678897.5658      | 4.17           |
| 4      |    | -1081.892116     | -678897.4628      | 3.50           |
| 5      |   | -1081.890423     | -678896.4005      | 0.58           |
| 6      |  | -1081.886496     | -678893.9362      | 0.01           |

**Table S4.** Re-optimized conformers, energies and proportions for **6**.

| Number | Conformer                                                                           | Energy (hartree) | Energy (Kcal/mol) | Proportion (%) |
|--------|-------------------------------------------------------------------------------------|------------------|-------------------|----------------|
| 1      | 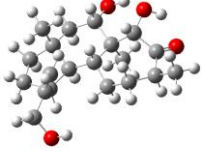   | -1081.931903     | -678922.4296      | 53.29          |
| 2      |    | -1081.931269     | -678922.0317      | 27.21          |
| 3      |    | -1081.930953     | -678921.8334      | 19.47          |
| 4      |   | -1081.924342     | -678917.685       | 0.02           |
| 5      |  | -1081.923976     | -678917.4553      | 0.01           |
| 6      |  | -1081.922774     | -678916.701       | 0              |
| 7      |  | -1081.921756     | -678916.0622      | 0              |
| 8      |  | -1081.921615     | -678915.9737      | 0              |

**Table S5.** mPW1PW91/6-31+G\*\* reoptimized of **12R\*-7**.

|                  | <i>G</i> (kcal/mol) | $\Delta G$ (kcal/mol) | Boltzmann factor | Equilibrium mole fraction | Imaginary frequency |
|------------------|---------------------|-----------------------|------------------|---------------------------|---------------------|
| <b>12R*-7-c1</b> | -678917.6686        | 0                     | 1                | 0.997549748               | 0                   |
| <b>12R*-7-c2</b> | -678913.8076        | 3.861065283           | 0.001467837      | 0.001464241               | 0                   |
| <b>12R*-7-c3</b> | -678913.5195        | 4.149092093           | 0.000902232      | 0.000900022               | 0                   |
| <b>12R*-7-c4</b> | -678911.8918        | 5.776851454           | 0.000057655      | 0.000057514               | 0                   |
| <b>12R*-7-c5</b> | -678911.4758        | 6.192890180           | 0.000028546      | 0.000028476               | 0                   |

**Table S6.** mPW1PW91/6-31+G\*\* reoptimized of **12S\*-7**.

|                  | <i>G</i> (kcal/mol) | $\Delta G$ (kcal/mol) | Boltzmann factor | Equilibrium mole fraction | Imaginary frequency |
|------------------|---------------------|-----------------------|------------------|---------------------------|---------------------|
| <b>12S*-7-c1</b> | -678915.7579        | 0                     | 1                | 0.934814500               | 0                   |
| <b>12S*-7-c2</b> | -678913.6739        | 2.083958687           | 0.029563241      | 0.027636146               | 0                   |
| <b>12S*-7-c3</b> | -678913.5628        | 2.195027850           | 0.024504588      | 0.022907245               | 0                   |
| <b>12S*-7-c4</b> | -678913.1738        | 2.584083672           | 0.012698457      | 0.011870702               | 0                   |
| <b>12S*-7-c5</b> | -678912.3128        | 3.445026557           | 0.002964660      | 0.002771407               | 0                   |
